# Supplementary material
Source: PubMed Central journal article supplement (PMC3275665)
Supplement: NIHMS335631-supplement-2.pdf [file NIHMS335631-supplement-2.pdf]

Supporting Information

© Wiley-VCH 2011

69451 Weinheim, Germany

**Lewis Acid Activated Synthesis of Highly Substituted Cyclopentanes  
by the N-Heterocyclic-Carbene-Catalyzed Addition of Homoenate  
Equivalents to Unsaturated Ketoesters\*\***

*Daniel T. Cohen, Benoit Cardinal-David, and Karl A. Scheidt\**

anie\_201005908\_sm\_miscellaneous\_information.pdf

## Supporting Information

### Table of Contents

|                                                                                         |     |
|-----------------------------------------------------------------------------------------|-----|
| Table of Contents .....                                                                 | S1  |
| General Information .....                                                               | S2  |
| General Procedure for the Synthesis of Cyclopentanol .....                              | S2  |
| Selected NMR Spectra.....                                                               | S19 |
| HPLC Traces of Racemic and Enantioenriched Compounds .....                              | S46 |
| Determination of Absolute Stereochemistry of <b>4</b> .....                             | S68 |
| Determination of Relative Stereochemistry of the Minor Diastereomer ( <b>29</b> ) ..... | S68 |

## General Information

All reactions were carried out under a nitrogen atmosphere in oven-dried glassware with magnetic stirring. THF, toluene, and DMF were purified by passage through a bed of activated alumina.<sup>1</sup> Reagents were purified prior to use unless otherwise stated following the guidelines of Perrin and Armarego.<sup>2</sup> Isopropanol (IPA) was distilled from CaH<sub>2</sub>. Purification of reaction products was carried out by flash chromatography using EM Reagent silica gel 60 (230-400 mesh). Analytical thin layer chromatography was performed on EM Reagent 0.25 mm silica gel 60-F plates. Visualization was accomplished with UV light and ceric ammonium nitrate stain or potassium permanganate stain followed by heating. Infrared spectra were recorded on a Bruker Tensor 37 FT-IR spectrometer. <sup>1</sup>H-NMR spectra were recorded on a Bruker Avance 500 (500 MHz) spectrometer and are reported in ppm using solvent as an internal standard (CDCl<sub>3</sub> at 7.26 ppm). Data are reported as (ap = apparent, s = singlet, d = doublet, t = triplet, q = quartet, m = multiplet, b = broad; coupling constant(s) in Hz; integration. Proton-decoupled <sup>13</sup>C-NMR spectra were recorded on a Bruker Avance 500 (125 MHz) spectrometer and are reported in ppm using solvent as an internal standard (CDCl<sub>3</sub> at 77.1 ppm). Mass spectra data were obtained on a Varian 1200 Quadrupole Mass Spectrometer and Micromass Quadro II Spectrometer.

Trans-cinnamaldehyde, 3-(4-Methoxy-phenyl)-propenal, and (E)-3-(2-methoxyphenyl)acrylaldehyde were used from commercial sources (Sigma Aldrich, Acros Chemical Company respectively). Other enals prepared according to Cacchi.<sup>3</sup>

*E*- $\gamma$ -aryl- $\alpha$ -oxobutenoic esters were prepared according to Dujardin<sup>4</sup>, Chen<sup>5</sup>, Srivastava<sup>6</sup>, and Meijer.<sup>7</sup>

## General Procedure for the Synthesis of Cyclopentanols

A oven dried screw-capped vial equipped with a magnetic stirbar was charged with azolium precatalyst **E** (0.2 equiv) and *E*- $\gamma$ -aryl- $\alpha$ -oxobutenoic ester (3.0 equiv). The vial was capped with a septum cap, removed from the drybox and put under positive N<sub>2</sub> pressure. Into the vial were then successively added cinnamaldehyde (32.2 mg, 0.244 mmol), THF (0.50 M), Ti(O*i*Pr)<sub>4</sub> (5.0 equiv.), *i*-PrOH (6.0 equiv) and finally DBU (0.4 equiv) by a syringe. The reaction mixture was stirred at room temperature under static nitrogen. Upon consumption of the aldehyde and transesterification (all reactions were

---

[1] A. B. Pangborn, M. A. Giardello, R. H. Grubbs, R. K. Rosen, F. J. Timmers, *Organometallics* **1996**, *15*, 1518.

[2] D. D. Perrin, W. L. Armarego, *Purification of Laboratory Chemicals*; 3rd Ed., Pergamon Press, Oxford. 1988.

[3] G. Battistuzzi, S. Cacchi, G. Fabrizi, *Org. Lett.* **2003**, *5*, 777-780.

[4] G. Dujardin, S. Leconte, A. Benard, E. Brown, *Synlett* **2001**, 147-149.

[5] Y-C. Wu, L. Liu, H-J. Li, D. Wang, Y-J. Chen, *J. Org. Chem.*, **2006**, *71*, 6592-6595.

[6] B. K. Srivastava,\* A. Joharapurkar, S. Raval, J. Z. Patel, R. Soni, P. Raval, A. Gite, A. Goswami, N. Sadhwani, N. Gandhi, H. Patel, B. Mishra, M. Solanki, B. Pandey, M. R. Jain, and P. R. Patel, *J. Med. Chem.* **2007**, *50*, 5951-5966.

[7] L. H. P. Meijer, J. C. G. Van Niel, U. K. Pandit, *Tetrahedron* **1984**, *40*, 5185-5195.

completed within 48 hours) the reaction mixture was filtered through a short plug of SiO<sub>2</sub> and washed with EtOAc. The solution was concentrated under reduced pressure and purified by flash chromatography with EtOAc/hexanes to afford the corresponding cyclopentanol.

The corresponding racemic compounds were prepared by employing the same protocol but with achiral azolium precatalyst **A** (20 mol%) and no *i*-PrOH.

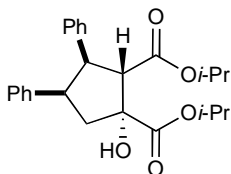

**(1R,2S,3R,4R)-diisopropyl 1-hydroxy-3,4-diphenylcyclopentane-1,2-dicarboxylate (3):** Prepared according to the general procedure using *trans*-cinnamaldehyde (31  $\mu$ L, 0.244 mmol) and (*E*)-methyl 2-oxo-4-phenylbut-3-enoate (139 mg, 0.732 mmol) and purified by flash chromatography using 9% EtOAc/hexanes to afford 78 mg (78% yield) of **3** (20:1 dr) as a yellowish oil. Analytical data for **3**: IR (film) 3502, 3058, 3030, 2981, 2920, 2851, 1737, 1679, 1604, 1498, 1455, 1375, 1321, 1263, 1241, 1182, 1107, 1067, 911, 742, 699  $\text{cm}^{-1}$ ; <sup>1</sup>H NMR (500 MHz; CDCl<sub>3</sub>):  $\delta$  7.06-6.97 (m, 6H), 6.97-6.90 (m, 4H), 5.26 (sept, *J* = 6.3 Hz, 1H), 4.97 (sept, *J* = 6.2 Hz, 1H), 4.26 (dd, *J* = 9.5, 9.5 Hz, 1H), 4.05 (ddd, *J* = 9.8, 7.3, 7.3 Hz, 1H), 3.99 (s, 1H), 3.85 (d, *J* = 9.2 Hz, 1H), 2.80 (dd, *J* = 13.4, 10.1 Hz, 1H), 2.36 (dd, *J* = 13.5, 7.2 Hz, 1H), 1.45 (d, *J* = 6.3 Hz, 3H), 1.43 (d, *J* = 6.3 Hz, 3H), 1.17 (d, *J* = 6.2 Hz, 3H), 1.10 (d, *J* = 6.3 Hz, 3H); <sup>13</sup>C NMR (125 MHz; CDCl<sub>3</sub>):  $\delta$  174.8, 170.2, 140.9, 140.7, 128.7(2C), 128.5(2C), 127.8(2C), 127.7(2C), 126.1, 126.0, 81.5, 70.7, 68.5, 59.0, 50.1, 47.9, 44.3, 22.0(2C), 21.9(2C); LRMS (ESI): Mass calcd for C<sub>25</sub>H<sub>31</sub>O<sub>5</sub> [M+H]<sup>+</sup>, 411. Found [M+H]<sup>+</sup>, 411. Enantiomeric ratio was measured by chiral phase HPLC (Chiralcel OD-H, 5% *i*-PrOH/Hexanes, 0.50 mL/min, 210 nm), Rt (major) = 13.2 min, Rt (minor) = 18.7 min; ee = 95%.

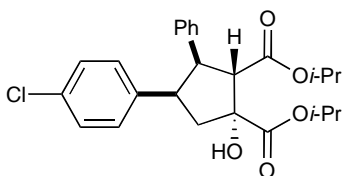

**(1R,2S,3R,4R)-diisopropyl 4-(4-chlorophenyl)-1-hydroxy-3-phenylcyclopentane-1,2-dicarboxylate (4):** Prepared according to the general procedure using *trans*-cinnamaldehyde (31  $\mu$ L, 0.244 mmol) and (*E*)-methyl 4-(4-chlorophenyl)-2-oxobut-3-enoate (164 mg, 0.732 mmol) and purified by flash chromatography using 9% EtOAc/hexanes to afford 75 mg (69% yield) of **4** (20:1 dr) as a white solid. Analytical data for **4**: IR (film) 3518, 3069, 3030, 2981, 2921, 2851, 1737, 1699, 1664, 1603, 1494, 1454, 1375, 1283, 1248, 1182, 1107, 1014, 911, 830, 738, 700  $\text{cm}^{-1}$ ; <sup>1</sup>H NMR (500 MHz; CDCl<sub>3</sub>):  $\delta$  7.08-6.99 (m, 5H), 6.91-6.90 (m, 2H), 6.85 (d, *J* = 8.4 Hz, 2H), 5.25 (sept, *J* = 6.3 Hz, 1H), 4.96 (sept, *J* = 6.3 Hz, 1H), 4.24 (dd, *J* = 9.3, 9.3 Hz, 1H), 4.01 (ddd, *J* = 9.9, 7.2, 7.2 Hz, 1H), 3.97 (s, 1H), 3.82 (d, *J* = 9.0 Hz, 1H), 2.72 (dd, *J* = 13.4, 10.3 Hz,

1H), 2.33 (dd,  $J = 13.4, 7.1$  Hz, 1H), 1.44 (d,  $J = 6.3$  Hz, 3H), 1.42 (d,  $J = 6.2$  Hz, 3H), 1.16 (d,  $J = 6.2$  Hz, 3H), 1.10 (d,  $J = 6.3$  Hz, 3H);  $^{13}\text{C}$  NMR (125 MHz;  $\text{CDCl}_3$ ):  $\delta$  174.6, 170.0, 140.5, 139.4, 131.8, 129.8(2C), 128.7(2C), 128.0(2C), 127.8(2C), 126.4, 81.3, 70.9, 68.6, 59.1, 49.9, 47.4, 44.3, 22.0, 21.9(2C), 21.8; LRMS (ESI): Mass calcd for  $\text{C}_{25}\text{H}_{30}\text{O}_5\text{Cl}$   $[\text{M}+\text{H}]^+$ , 445. Found  $[\text{M}+\text{H}]^+$ , 445. Enantiomeric ratio was measured by chiral phase HPLC (Chiralcel AD-H, 5% *i*-PrOH/Hexanes, 1.0 mL/min, 210 nm),  $R_t$  (major) = 16.0 min,  $R_t$  (minor) = 12.8 min; ee = 97%.

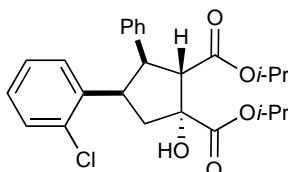

**(1R,2S,3R,4R)-diisopropyl 4-(2-chlorophenyl)-1-hydroxy-3-phenylcyclopentane-1,2-dicarboxylate (5):** Prepared according to general procedure using cinnamaldehyde (15.4  $\mu\text{L}$ , 0.12 mmol) and (*E*)-methyl 4-(2-chlorophenyl)-2-oxobut-3-enoate (82 mg, 0.37 mmol) and purified by flash chromatography using 5% EtOAc/hexanes to 15% EtOAc/hexanes to afford 39 mg (72% yield) of **5** (13:1 dr) as a yellowish oil. Analytical data for **5**: IR (film) 3499, 2981, 2937, 1737, 1375, 1244, 1196, 1182, 1107, 1055, 911, 754, 702  $\text{cm}^{-1}$ ;  $^1\text{H}$  NMR (500 MHz,  $\text{CDCl}_3$ )  $\delta$  7.12 (dd,  $J = 1.3, 7.5$  Hz, 1H), 7.05-6.91 (m, 8H), 5.25 (sept,  $J = 6.3$  Hz, 1H), 4.99 (sept,  $J = 6.3$  Hz, 1H), 4.53-4.45 (m, 2H), 3.94 (s, 1H), 3.82 (d,  $J = 6.9$  Hz, 1H), 2.86-2.77 (m, 1H), 2.23-2.17 (m, 1H), 1.45 (d,  $J = 6.3$  Hz, 3H), 1.41 (d,  $J = 6.2$  Hz, 3H), 1.19 (d,  $J = 6.2$  Hz, 3H), 1.13 (d,  $J = 6.3$  Hz, 3H);  $^{13}\text{C}$  NMR (125 MHz,  $\text{CDCl}_3$ )  $\delta$  174.5, 169.9, 141.2, 138.1, 134.7, 129.0, 128.5(2C), 128.0, 127.6(2C), 127.3, 126.1, 125.8, 81.0, 70.6, 68.5, 60.5, 47.3, 44.7, 43.0, 21.9, 21.8(2C), 21.7; LRMS (ESI): Mass calcd for  $\text{C}_{25}\text{H}_{29}\text{NaClO}_5$   $[\text{M}+\text{Na}]^+$ , 467. Found  $[\text{M}+\text{Na}]^+$ , 467; Enantiomeric ratio was measured by chiral phase HPLC (Chiralcel OD-H, 3% *i*-PrOH/Hexanes, 0.5 mL/min, 210 nm),  $R_t$  (major) = 12.7 min,  $R_t$  (minor) = 18.1 min; ee = 95%.

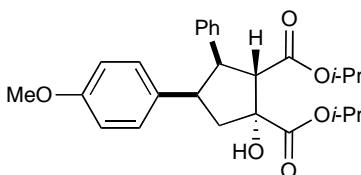

**(1R,2S,3R,4R)-diisopropyl 1-hydroxy-4-(4-methoxyphenyl)-3-phenylcyclopentane-1,2-dicarboxylate (6):** Prepared according to the general procedure using *trans*-cinnamaldehyde (31  $\mu\text{L}$ , 0.244 mmol) and (*E*)-methyl 4-(4-methoxyphenyl)-2-oxobut-3-enoate (164 mg, 0.732 mmol) and purified by flash chromatography using 9% EtOAc/hexanes to afford 88 mg (82% yield) of **6** (20:1 dr) as an orange oil. Analytical data for **6**: IR (film) 3502, 3062, 3031, 2981, 2932, 2852, 1735, 1612, 1584, 1514, 1455, 1375, 1250, 1180, 1107, 1038, 971, 910, 830, 738, 701  $\text{cm}^{-1}$ ;  $^1\text{H}$  NMR (500 MHz;  $\text{CDCl}_3$ ):  $\delta$  7.06-6.99 (m, 3H), 6.92-6.90 (m, 2H), 6.84 (m, 2H), 6.59-6.58 (m, 2H), 5.25 (sept,  $J = 6.3$  Hz, 1H), 4.96 (sept,  $J = 6.3$  Hz, 1H), 4.20 (dd,  $J = 9.4, 9.4$  Hz, 1H), 4.01-

3.96 (m, 2H), 3.83 (d,  $J = 9.2$  Hz, 1H), 3.68 (s, 3H), 2.73 (dd,  $J = 13.5, 10.0$  Hz, 1H), 2.33 (dd,  $J = 13.5, 7.2$  Hz, 1H), 1.44 (d,  $J = 6.3$  Hz, 3H), 1.43 (d,  $J = 6.2$  Hz, 3H), 1.16 (d,  $J = 6.2$  Hz, 3H), 1.09 (d,  $J = 6.3$  Hz, 3H);  $^{13}\text{C}$  NMR (125 MHz;  $\text{CDCl}_3$ ):  $\delta$  174.8, 170.3, 157.8, 140.8, 133.0, 129.4(2C), 128.8(2C), 127.9(2C), 126.1, 113.1(2C), 81.4, 70.7, 68.5, 58.9, 55.2, 50.1, 47.2, 44.6, 22.0(2C), 21.9(2C); LRMS (ESI): Mass calcd for  $\text{C}_{26}\text{H}_{33}\text{O}_6$   $[\text{M}+\text{H}]^+$ , 441. Found  $[\text{M}+\text{H}]^+$ , 441. Enantiomeric ratio was measured by chiral phase HPLC (Chiralcel AD-H, 5% *i*-PrOH/Hexanes, 0.75 mL/min, 210 nm),  $R_t$  (major) = 27.0 min,  $R_t$  (minor) = 22.1 min; ee = 96%.

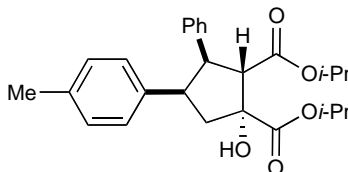

**(1R,2S,3R,4R)-diisopropyl 1-hydroxy-3-phenyl-4-*p*-tolylcyclopentane-1,2-dicarboxylate (7):** Prepared according to general procedure using cinnamaldehyde (29.7  $\mu\text{L}$ , 0.236 mmol) and (*E*)-methyl 2-oxo-4-*p*-tolylbut-3-enoate (145 mg, 0.708 mmol) and purified by flash chromatography using 7.5% EtOAc/hexanes to 20% EtOAc/hexanes to afford 82 mg (82% yield) of **7** (20:1 dr) as a yellowish oil. Analytical data for **7**: IR (film) 3498, 2980, 2935, 1737, 1375, 1241, 1226, 1181, 1108, 700  $\text{cm}^{-1}$ ;  $^1\text{H}$  NMR (500 MHz,  $\text{CDCl}_3$ )  $\delta$  7.07-6.97 (m, 3H), 6.93-6.89 (m, 2H), 6.85 (d,  $J = 8.0$  Hz, 2H), 6.81 (d,  $J = 8.1$  Hz, 2H), 5.24 (sept,  $J = 6.3$  Hz, 1H), 4.95 (sept,  $J = 6.3$  Hz, 1H), 4.22 (d,  $J = 9.4, 9.4$  Hz, 1H), 4.00 (ddd,  $J = 7.8, 9.7, 9.7$  Hz, 1H), 3.97 (s, 1H), 3.83 (d,  $J = 9.2$  Hz, 1H), 2.76 (dd,  $J = 10.1, 13.3$  Hz, 1H), 2.34 (dd,  $J = 7.2, 13.5$  Hz, 1H), 2.18 (s, 3H), 1.44 (d,  $J = 6.3$  Hz, 3H), 1.42 (d,  $J = 6.2$  Hz, 3H), 1.15 (d,  $J = 6.2$  Hz, 3H), 1.09 (d,  $J = 6.3$  Hz, 3H);  $^{13}\text{C}$  NMR (125 MHz,  $\text{CDCl}_3$ )  $\delta$  174.8, 170.2, 140.8, 137.7, 135.4, 128.7(2C), 128.33(2C), 128.31(2C), 127.7(2C), 126.0, 81.3, 70.6, 68.4, 58.9, 50.0, 47.5, 44.4, 21.9, 21.8(3C), 21.0; LRMS (ESI): Mass calcd for  $\text{C}_{26}\text{H}_{32}\text{NaO}_5$   $[\text{M}+\text{Na}]^+$ , 447. Found  $[\text{M}+\text{Na}]^+$ , 447; Enantiomeric ratio was measured by chiral phase HPLC (Chiralcel OD-H, 3% *i*-PrOH/Hexanes, 0.5 mL/min, 210 nm),  $R_t$  (major) = 11.7 min,  $R_t$  (minor) = 13.9 min; ee = 97%.

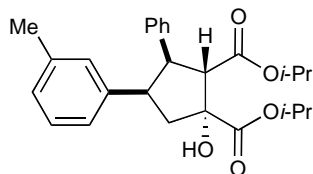

**(1R,2S,3R,4R)-diisopropyl 1-hydroxy-3-phenyl-4-*m*-tolylcyclopentane-1,2-dicarboxylate (8):** Prepared according to general procedure using cinnamaldehyde (29.7  $\mu\text{L}$ , 0.236 mmol) and (*E*)-methyl 2-oxo-4-*m*-tolylbut-3-enoate (145 mg, 0.708 mmol) and purified by flash chromatography using 7.5% EtOAc/hexanes to 20% EtOAc/hexanes to afford 68 mg (68% yield) of **8** (20:1 dr) as a yellowish oil. Analytical data for **8**:  $^1\text{H}$  NMR (500 MHz,  $\text{CDCl}_3$ )  $\delta$  7.06-6.96 (m, 3H), 6.94-6.88 (m, 3H), 6.81 (d,  $J = 7.6$  Hz, 1H), 6.73-6.70 (m, 2H), 5.25 (sept,  $J = 6.3$  Hz, 1H), 4.96 (sept,  $J = 6.3$  Hz, 1H), 4.23 (dd,  $J =$

9.6, 9.6 Hz, 1H), 3.99 (ddd,  $J = 7.6, 9.7, 9.7$  Hz, 1H), 3.98 (s, 1H), 3.84 (d,  $J = 9.3$  Hz, 1H), 2.77 (dd,  $J = 9.9, 13.4$  Hz, 1H), 2.34 (dd,  $J = 7.2, 13.5$  Hz, 1H), 2.15 (s, 3H), 1.45 (d,  $J = 6.3$  Hz, 3H), 1.43 (d,  $J = 6.2$  Hz, 3H), 1.15 (d,  $J = 6.2$  Hz, 3H), 1.09 (d,  $J = 6.3$  Hz, 3H);  $^{13}\text{C}$  NMR (125 MHz,  $\text{CDCl}_3$ )  $\delta$  174.7, 170.1, 140.7, 140.6, 137.0, 129.3, 128.6(2C), 127.5(2C), 127.4, 126.6, 126.0, 125.4, 81.4, 70.6, 68.4, 58.7, 50.0, 47.7, 44.2, 21.9, 21.7(3C), 21.3; IR (film) 3501, 2981, 2937, 1736, 1375, 1235, 1182, 1107, 701  $\text{cm}^{-1}$ ; LRMS (ESI): Mass calcd for  $\text{C}_{26}\text{H}_{32}\text{NaO}_5$   $[\text{M}+\text{Na}]^+$ , 447. Found  $[\text{M}+\text{Na}]^+$ : 447; Enantiomeric ratio was measured by chiral phase HPLC (Chiralcel OD-H, 5% *i*-PrOH/Hexanes, 0.5 mL/min, 210 nm),  $R_t$  (major) = 11.5 min,  $R_t$  (minor) = 15.7 min; ee = 97%.

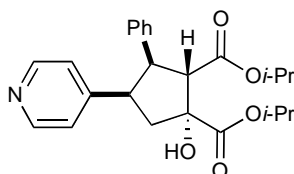

**(1R,2S,3R,4R)-diisopropyl 1-hydroxy-3-phenyl-4-(pyridin-4-yl)cyclopentane-1,2-dicarboxylate (9)**: Prepared according to general procedure using cinnamaldehyde (12.6  $\mu\text{L}$ , 0.10 mmol) and (*E*)-methyl 2-oxo-4-(pyridin-4-yl)but-3-enoate (57 mg, 0.30 mmol) and purified by flash chromatography using 30% EtOAc/hexanes to 70% EtOAc/hexanes to afford 21 mg (51% yield) of **9** (12:1 dr) as a yellowish oil. Analytical data for **9**:  $^1\text{H}$  NMR (500 MHz,  $\text{CDCl}_3$ )  $\delta$  8.25 (s broad, 2H), 7.08-6.99 (m, 3H), 6.93-6.90 (m, 2H), 6.88-6.82 (m, 2H), 5.26 (sept,  $J = 6.3$  Hz, 1H), 4.97 (sept,  $J = 6.3$  Hz, 1H), 4.31 (dd,  $J = 9.5, 9.5$  Hz, 1H), 4.01 (ddd,  $J = 7.1, 10.0$  Hz, 1H), 3.98 (s, 1H), 3.81 (d,  $J = 9.0$  Hz, 1H), 2.76 (dd,  $J = 10.3, 13.3$  Hz, 1H), 2.35 (dd,  $J = 7.0, 13.4$  Hz, 1H), 1.45 (d,  $J = 6.3$  Hz, 3H), 1.43 (d,  $J = 6.2$  Hz, 3H), 1.17 (d,  $J = 6.2$  Hz, 3H), 1.11 (d,  $J = 6.3$  Hz, 3H);  $^{13}\text{C}$  NMR (125 MHz,  $\text{CDCl}_3$ )  $\delta$  174.2, 169.6, 150.0, 149.0(2C), 139.9, 128.4(2C), 128.0(2C), 126.5(2C), 123.7, 81.2, 70.9, 68.6, 59.1, 49.5, 47.1, 43.3, 21.9, 21.73, 21.71, 21.70; IR (film) 3495, 2981, 2930, 1738, 1375, 1231, 1182, 1108, 702  $\text{cm}^{-1}$ ; LRMS (ESI): Mass calcd for  $\text{C}_{24}\text{H}_{30}\text{O}_5$   $[\text{M}+\text{H}]^+$ , 412. Found  $[\text{M}+\text{H}]^+$ , 412; Enantiomeric ratio was measured by chiral phase HPLC (Chiralcel AD-H, 12% *i*-PrOH/Hexanes, 1 mL/min, 210 nm),  $R_t$  (major) = 25.6 min,  $R_t$  (minor) = 14.4 min; ee = 97%.

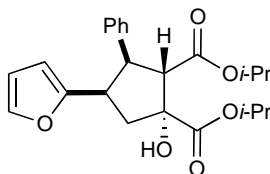

**(1R,2S,3R,4R)-diisopropyl 4-(furan-2-yl)-1-hydroxy-3-phenylcyclopentane-1,2-dicarboxylate (10)**: Prepared according to general procedure using cinnamaldehyde (30.2  $\mu\text{L}$ , 0.24 mmol) and (*E*)-methyl 4-(furan-2-yl)-2-oxobut-3-enoate (135 mg, 0.72 mmol) and purified by flash chromatography using 7.5% EtOAc/hexanes to 30% EtOAc/hexanes to afford 77 mg (77% yield) of **10** (20:1 dr) as a yellowish oil. Analytical data for **10**: IR (film) 3495, 2982, 1735, 1375, 1233, 1182, 1107, 737, 700  $\text{cm}^{-1}$ ;  $^1\text{H}$  NMR (500 MHz,  $\text{CDCl}_3$ )  $\delta$  7.14-7.08 (m, 3H), 7.06-7.04 (m, 1H), 7.02-6.98 (m, 2H), 6.07 (dd,

$J = 1.9, 2.9$  Hz, 1H), 5.89 (d,  $J = 3.1$  Hz, 1H), 5.21 (sept,  $J = 6.3$  Hz, 1H), 4.92 (sept,  $J = 6.3$  Hz, 1H), 4.14 (dd,  $J = 10.2, 10.2$  Hz, 1H), 4.02 (s, 1H), 3.96 (dd,  $J = 8.5, 17.6$  Hz, 1H), 3.80 (d,  $J = 10.9$  Hz, 1H), 2.72 (dd,  $J = 8.4, 13.8$  Hz, 1H), 2.38 (dd,  $J = 8.1, 13.8$  Hz, 1H), 1.41 (d,  $J = 6.3$  Hz, 3H), 1.40 (d,  $J = 6.2$  Hz, 3H), 1.12 (d,  $J = 6.2$  Hz, 3H), 1.04 (d,  $J = 6.3$  Hz, 3H);  $^{13}\text{C}$  NMR (125 MHz,  $\text{CDCl}_3$ )  $\delta$  174.2, 170.1, 155.1, 141.1, 139.7(2C), 128.2(2C), 127.7, 126.3, 109.8, 106.6, 81.2, 70.4, 68.3, 57.9, 49.6, 43.0, 41.4, 21.8, 21.7, 21.6(2C); LRMS (ESI): Mass calcd for  $\text{C}_{23}\text{H}_{28}\text{O}_6\text{Na}$   $[\text{M}+\text{Na}]^+$ , 423. Found  $[\text{M}+\text{Na}]^+$ , 423; Enantiomeric ratio was measured by chiral phase HPLC (Chiralcel OD-H, 5% *i*-PrOH/Hexanes, 0.5 mL/min, 210 nm), Rt (major) = 11.8 min, Rt (minor) = 14.8 min; ee = 97%.

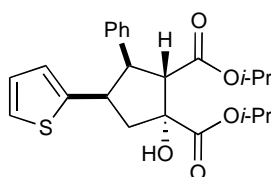

**(1R,2S,3S,4R)-diisopropyl 1-hydroxy-3-phenyl-4-(thiophen-2-yl)cyclopentane-1,2-dicarboxylate (11):** Prepared according to general procedure using cinnamaldehyde (31.5  $\mu\text{L}$ , 0.25 mmol) and (*E*)-methyl 2-oxo-4-(thiophen-2-yl)but-3-enoate (141 mg, 0.75 mmol) and purified by flash chromatography using 7.5% EtOAc/hexanes to 20% EtOAc/hexanes to afford 85 mg (85% yield) of **11** (20:1 dr) as a yellowish oil. Analytical data for **11**: IR (film) 3501, 2981, 2936, 1738, 1375, 1233, 1182, 1107, 697  $\text{cm}^{-1}$ ;  $^1\text{H}$  NMR (500 MHz,  $\text{CDCl}_3$ )  $\delta$  7.14-7.05 (m, 3H), 7.02-6.98 (m, 2H), 6.95-6.93 (m, 1H), 6.72 (dd,  $J = 3.7, 4.9$  Hz, 1H), 6.60 (d,  $J = 3.4$  Hz, 1H), 5.24 (sept,  $J = 6.3$  Hz, 1H), 4.95 (sept,  $J = 6.2$  Hz, 1H), 4.25-4.15 (m, 2H), 3.98 (s, 1H), 3.86 (d,  $J = 6.9$  Hz, 1H), 2.77-2.71 (m, 1H), 2.51-2.46 (m, 1H), 1.44 (d,  $J = 6.5$  Hz, 3H), 1.43 (d,  $J = 6.4$  Hz, 3H), 1.15 (d,  $J = 6.2$  Hz, 3H), 1.09 (d,  $J = 6.3$  Hz, 3H);  $^{13}\text{C}$  NMR (125 MHz,  $\text{CDCl}_3$ )  $\delta$  174.4, 169.9, 144.9, 140.1, 128.6(2C), 127.8(2C), 126.4, 126.2(2C), 124.9, 123.7, 81.1, 70.7, 68.5, 58.4, 50.2, 46.3, 43.3, 21.9, 21.8(2C), 21.7; LRMS (ESI): Mass calcd for  $\text{C}_{23}\text{H}_{29}\text{O}_5\text{S}$   $[\text{M}+\text{H}]^+$ , 417. Found  $[\text{M}+\text{H}]^+$ , 417; Enantiomeric ratio was measured by chiral phase HPLC (Chiralcel OJ, 10% *i*-PrOH/Hexanes, 1 mL/min, 210 nm), Rt (major) = 5.3 min, Rt (minor) = 7.6 min; ee = 97%.

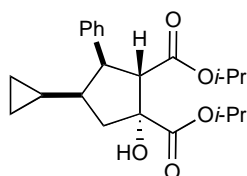

**(1R,2S,3R,4S)-diisopropyl 4-cyclopropyl-1-hydroxy-3-phenylcyclopentane-1,2-dicarboxylate (12):** Prepared according to general procedure using cinnamaldehyde (12.6  $\mu\text{L}$ , 0.10 mmol) and (*E*)-methyl 4-cyclopropyl-2-oxobut-3-enoate (46 mg, 0.30 mmol) and purified by flash chromatography using 5% EtOAc/hexanes to 20% EtOAc/hexanes to afford 23 mg (61% yield) of **12** (20:1 dr) as a yellowish oil. Analytical data for **12**: IR (film) 3505, 2981, 2936, 1738, 1375, 1230, 1181, 1108, 750, 702  $\text{cm}^{-1}$ ;  $^1\text{H}$



NMR (500 MHz, CDCl<sub>3</sub>)  $\delta$  7.32-7.27 (m, 4H), 7.24-7.18 (m, 1H), 5.18 (sept,  $J$  = 6.2 Hz, 1H), 4.93 (sept,  $J$  = 6.2 Hz, 1H), 3.95 (dd,  $J$  = 9.3, 9.3 Hz, 1H), 3.80 (s, 1H), 3.76 (d,  $J$  = 9.1 Hz, 1H), 2.20 (dd,  $J$  = 10.5, 13.0 Hz, 1H), 2.10 (dd,  $J$  = 6.8, 13.2 Hz, 1H), 1.92 (dddd,  $J$  = 7.1, 9.8, 9.8, 9.8 Hz, 1H), 1.38 (d,  $J$  = 6.0 Hz, 3H), 1.37 (d,  $J$  = 5.7 Hz, 3H), 1.14 (d,  $J$  = 6.2 Hz, 3H), 1.09 (d,  $J$  = 6.2 Hz, 3H), 0.30-0.16 (m, 2H), 0.04- -0.03 (m, 2H), -0.11- -0.17 (m, 1H); <sup>13</sup>C NMR (125 MHz, CDCl<sub>3</sub>)  $\delta$  174.7, 170.3, 142.0, 128.8(2C), 127.9(2C), 126.1, 81.3, 70.2, 68.2, 59.4, 48.0(2C), 45.1, 21.8, 21.73, 21.70, 21.66, 12.8, 4.6, 3.8, ; LRMS (ESI): Mass calcd for C<sub>22</sub>H<sub>31</sub>O<sub>5</sub> [M+H]<sup>+</sup>, 375. Found [M+H]<sup>+</sup>, 375; Enantiomeric ratio was measured by chiral phase HPLC (Chiralcel AD-H, 5% *i*-PrOH/Hexanes, 0.5 mL/min, 210 nm), Rt (major) = 18.8 min, Rt (minor) = 15.7 min; ee = 99%.

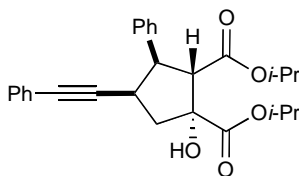

**(1R,2S,3R,4R)-diisopropyl 1-hydroxy-3-phenyl-4-(phenylethynyl)cyclopentane-1,2-dicarboxylate (13):** Prepared according to general procedure using cinnamaldehyde (12.6  $\mu$ L, 0.10 mmol) and (*E*)-methyl 2-oxo-6-phenylhex-3-en-5-ynoate (64 mg, 0.30 mmol) and purified by flash chromatography using 5% EtOAc/hexanes to 15% EtOAc/hexanes to afford 27 mg (62% yield) of **13** (20:1 dr) as a yellowish oil. Analytical data for **13**: IR (film) 3496, 2981, 2935, 1734, 1375, 1233, 1181, 757, 694 cm<sup>-1</sup>; <sup>1</sup>H NMR (500 MHz, CDCl<sub>3</sub>)  $\delta$  7.39-7.33 (m, 4H), 7.29-7.26 (m, 1H), 7.22-7.16 (m, 3H), 7.05-7.01 (m, 2H), 5.18 (sept,  $J$  = 6.3 Hz, 1H), 4.94 (sept,  $J$  = 6.3 Hz, 1H), 4.09 (dd,  $J$  = 9.9, 9.9 Hz, 1H), 3.90 (s, 1H), 3.78 (d,  $J$  = 10.4 Hz, 1H), 3.75 (ddd,  $J$  = 7.9, 8.6, 8.6 Hz, 1H), 2.56 (dd,  $J$  = 8.7, 13.4 Hz, 1H), 2.42 (dd,  $J$  = 7.6, 13.4 Hz, 1H), 1.35 (d,  $J$  = 6.3 Hz, 3H), 1.35 (d,  $J$  = 6.4 Hz, 3H), 1.14 (d,  $J$  = 6.2 Hz, 3H), 1.09 (d,  $J$  = 6.3 Hz, 3H); <sup>13</sup>C NMR (125 MHz, CDCl<sub>3</sub>)  $\delta$  173.9, 169.6, 140.5, 131.2(2C), 128.8(2C), 128.0(2C), 127.9(2C), 127.6, 126.8, 123.4, 90.3, 85.0, 81.1, 70.5, 68.5, 58.7, 48.5, 46.2, 35.0, 21.74, 21.71, 21.66, 21.63; LRMS (ESI): Mass calcd for C<sub>27</sub>H<sub>30</sub>NaO<sub>5</sub> [M+Na]<sup>+</sup>, 457. Found [M+Na]<sup>+</sup>, 457.4; Enantiomeric ratio was measured by chiral phase HPLC (Chiralcel AD-H, 5% *i*-PrOH/Hexanes, 0.5 mL/min, 210 nm), Rt (major) = 23.9 min, Rt (minor) = 18.3 min; ee = 94%.

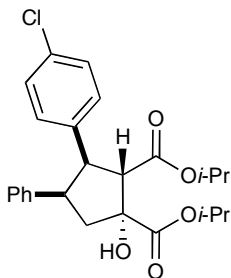

**(1R,2S,3R,4R)-diisopropyl 3-(4-chlorophenyl)-1-hydroxy-4-phenylcyclopentane-1,2-dicarboxylate (14):** Prepared according to the general procedure using (*E*)-3-(4-Chlorophenyl)-propanal (40.6 mg, 0.244 mmol) and (*E*)-methyl 2-oxo-4-phenylbut-3-enoate

(139 mg, 0.732 mmol) and purified by flash chromatography using 9% EtOAc/hexanes to afford 81 mg (74% yield) of **14** (20:1 dr) as a yellow oil. Analytical data for **14**: IR (film) 3488, 3068, 3030, 2983, 2938, 1734, 1699, 1664, 1623, 1602, 1494, 1454, 1366, 1266, 1229, 1182, 1106, 1014, 910, 827, 739, 702, 640  $\text{cm}^{-1}$ ;  $^1\text{H}$  NMR (500 MHz;  $\text{CDCl}_3$ ):  $\delta$  7.06 (m, 3H), 7.00 (d,  $J = 8.4$  Hz, 2H), 6.94 (d,  $J = 7.2$  Hz, 2H), 6.82 (d,  $J = 8.4$  Hz, 2H), 5.26 (sep,  $J = 6.3$  Hz, 1H), 4.96 (sep,  $J = 6.2$  Hz, 1H), 4.23 (dd,  $J = 9.7, 9.7$  Hz, 1H), 4.01 (ap q,  $J = 8.7$  Hz, 1H), 3.97 (s, 1H), 3.77 (d,  $J = 9.8$  Hz, 1H), 2.77 (dd,  $J = 13.7, 9.3$  Hz, 1H), 2.40 (dd,  $J = 13.7, 7.5$  Hz, 1H), 1.44 (d,  $J = 6.7$  Hz, 3H), 1.45 (d,  $J = 6.8$  Hz, 3H), 1.16 (d,  $J = 6.2$  Hz, 3H), 1.10 (d,  $J = 6.3$  Hz, 3H);  $^{13}\text{C}$  NMR (125 MHz;  $\text{CDCl}_3$ ):  $\delta$  174.6, 169.9, 140.8, 139.1, 131.9, 130.0(2C), 128.5(2C), 128.0(2C), 127.9(2C), 126.3, 81.4, 70.9, 68.7, 58.8, 49.6, 47.6, 44.4, 22.0, 21.9(2C), 21.8; LRMS (ESI): Mass calcd for  $\text{C}_{25}\text{H}_{30}\text{O}_5\text{Cl}$   $[\text{M}+\text{H}]^+$ , 445. Found  $[\text{M}+\text{H}]^+$ , 445. Enantiomeric ratio was measured by chiral phase HPLC (Chiralcel AD-H, 5% *i*-PrOH/Hexanes, 0.75 mL/min, 210 nm),  $R_t$  (major) = 20.3 min,  $R_t$  (minor) = 12.0 min; ee = 97%.

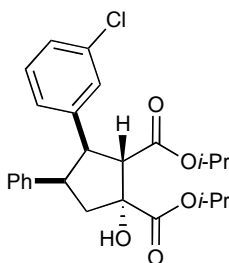

**(1R,2S,3R,4R)-diisopropyl 3-(3-chlorophenyl)-1-hydroxy-4-phenylcyclopentane-1,2-dicarboxylate (15)**: Prepared according to the general procedure using (*E*)-3-(3-Chlorophenyl)-propenal (40.6 mg, 0.244 mmol) and (*E*)-methyl 2-oxo-4-phenylbut-3-enoate (139 mg, 0.732 mmol) and purified by flash chromatography using 9% EtOAc/hexanes to afford 80 mg (73% yield) of **15** (20:1 dr) as a clear oil. Analytical data for **15**: IR (film) 3500, 3066, 3029, 2981, 2938, 2877, 1736, 1598, 1573, 1496, 1467, 1454, 1434, 1375, 1318, 1239, 1194, 1106, 1035, 912, 828, 786, 747, 700  $\text{cm}^{-1}$ ;  $^1\text{H}$  NMR (500 MHz;  $\text{CDCl}_3$ ):  $\delta$  7.06 (m, 3H), 6.96-6.93 (m, 5H), 6.73 (d,  $J = 7.4$  Hz, 1H), 5.26 (sep,  $J = 6.3$  Hz, 1H), 4.97 (sep,  $J = 6.2$  Hz, 1H), 4.22 (dd,  $J = 9.5, 9.5$  Hz, 1H), 4.02 (ddd,  $J = 9.8, 7.5, 7.5$  Hz, 1H), 3.97 (s, 1H), 3.79 (d,  $J = 9.3$  Hz, 1H), 2.77 (dd,  $J = 13.5, 9.8$  Hz, 1H), 2.37 (dd,  $J = 13.6, 7.3$  Hz, 1H), 1.46 (d,  $J = 6.4$  Hz, 3H), 1.45 (d,  $J = 6.4$  Hz, 3H), 1.17 (d,  $J = 6.2$  Hz, 3H), 1.12 (d,  $J = 6.3$  Hz, 3H);  $^{13}\text{C}$  NMR (125 MHz;  $\text{CDCl}_3$ ):  $\delta$  174.6, 169.9, 142.8, 140.5, 133.6, 129.0, 128.6(2C), 128.4(2C), 127.9, 127.2, 126.4, 126.3, 81.4, 71.0, 68.7, 58.6, 49.9, 47.9, 44.2, 22.0, 21.88(2C), 21.86; LRMS (ESI): Mass calcd for  $\text{C}_{25}\text{H}_{30}\text{O}_5\text{Cl}$   $[\text{M}+\text{H}]^+$ , 445. Found  $[\text{M}+\text{H}]^+$ , 445. Enantiomeric ratio was measured by chiral phase HPLC (Chiralcel AD-H, 5% *i*-PrOH/Hexanes, 1.0 mL/min, 210 nm),  $R_t$  (major) = 12.7 min,  $R_t$  (minor) = 10.2 min; ee = 97%.

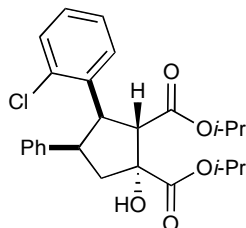

**(1R,2S,3R,4R)-diisopropyl 3-(2-chlorophenyl)-1-hydroxy-4-phenylcyclopentane-1,2-dicarboxylate (16):** Prepared according to the general procedure using (*E*)-3-(2-Chlorophenyl)-propenal (40.6 mg, 0.244 mmol) and (*E*)-methyl 2-oxo-4-phenylbut-3-enoate (139 mg, 0.732 mmol) and purified by flash chromatography using 9% EtOAc/hexanes to afford 81 mg (74% yield) of **16** (10:1 dr) as a light yellow solid. Analytical data for **16**: IR (film) 3502, 3063, 3029, 2981, 2936, 2876, 1738, 1603, 1496, 1477, 1455, 1444, 1375, 1321, 1238, 1183, 1106, 1034, 970, 910, 828, 786, 749, 727, 702 cm<sup>-1</sup>; <sup>1</sup>H NMR (500 MHz; CDCl<sub>3</sub>): δ 7.17 (dd, *J* = 7.8, 0.8 Hz, 1H), 7.03 (m, 4H), 7.01-6.96 (m, 1H), 6.91 (td, *J* = 7.6, 1.6 Hz, 1H), 6.86 (t, *J* = 7.2 Hz, 1H), 6.73 (d, *J* = 7.4 Hz, 1H), 5.26 (sep, *J* = 6.3 Hz, 1H), 4.94 (sep, *J* = 6.2 Hz, 1H), 4.73 (dd, *J* = 11.6, 10.0 Hz, 1H), 4.16 (ap q, *J* = 8.5 Hz, 1H), 4.00 (s, 1H), 3.89 (d, *J* = 11.9 Hz, 1H), 2.77 (dd, *J* = 14.2, 7.2 Hz, 1H), 2.53 (dd, *J* = 14.3, 8.5 Hz, 1H), 1.46 (d, *J* = 6.1 Hz, 3H), 1.45 (d, *J* = 6.2 Hz, 3H), 1.12 (d, *J* = 6.2 Hz, 3H), 1.10 (d, *J* = 6.3 Hz, 3H); <sup>13</sup>C NMR (125 MHz; CDCl<sub>3</sub>): δ 174.6, 169.9, 141.8, 137.6, 134.7, 129.2, 128.3(2C), 128.1, 127.7(2C), 127.3, 126.2, 125.9, 81.5, 70.8, 68.6, 56.7, 47.0, 45.2, 45.1, 21.2, 21.9, 21.83, 21.77; LRMS (ESI): Mass calcd for C<sub>25</sub>H<sub>30</sub>O<sub>5</sub>Cl [M+H]<sup>+</sup>, 445. Found [M+H]<sup>+</sup>, 445. Enantiomeric ratio was measured by chiral phase HPLC (Regis-Pirkle Welk-01, 3% *i*-PrOH/Hexanes, 0.50 mL/min, 210 nm), Rt (major) = 45.3 min, Rt (minor) = 41.2 min; ee = 98%.

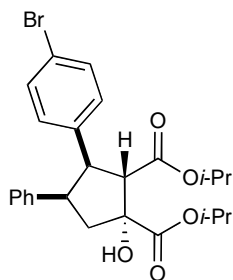

**(1R,2S,3R,4R)-diisopropyl 3-(4-bromophenyl)-1-hydroxy-4-phenylcyclopentane-1,2-dicarboxylate (17):** Prepared according to the general procedure using (*E*)-3-(4-bromophenyl)-propenal (51.5 mg, 0.244 mmol) and (*E*)-methyl 2-oxo-4-phenylbut-3-enoate (139 mg, 0.732 mmol) and purified by flash chromatography using 9% EtOAc/hexanes to afford 81 mg (74% yield) of **17** (20:1 dr) as a yellow oil. Analytical data for **17**: IR (film) 3502, 3062, 3029, 2981, 2936, 2873, 1786, 1733, 1603, 1491, 1454, 1386, 1237, 1183, 1107, 1010, 910, 825, 777, 749, 700 cm<sup>-1</sup>; <sup>1</sup>H NMR (500 MHz; CDCl<sub>3</sub>): δ 7.16-7.13 (m, 2H), 7.10-7.02 (m, 3H), 6.95-6.93 (m, 2H), 6.77-6.74 (m, 2H), 5.25 (sep, *J* = 6.3 Hz, 1H), 4.95 (sep, *J* = 6.3 Hz, 1H), 4.21 (dd, *J* = 9.7, 9.7 Hz, 1H), 4.00 (ddd, *J* = 9.6, 7.4, 7.4 Hz, 1H), 3.96 (s, 1H), 3.75 (d, *J* = 9.8 Hz, 1H), 2.76 (dd, *J* = 13.7, 9.3 Hz, 1H), 2.39 (dd, *J* = 13.7, 7.5 Hz, 1H), 1.44 (d, *J* = 6.3 Hz, 3H), 1.43 (d, *J* = 6.3 Hz, 3H), 1.16 (d, *J* = 6.2 Hz, 3H), 1.10 (d, *J* = 6.3 Hz, 3H); <sup>13</sup>C NMR (125 MHz; CDCl<sub>3</sub>): δ 174.6, 169.9, 140.7, 139.7,

130.8(2C), 130.4(2C), 128.5(2C), 128.0(2C), 126.4, 120.0, 81.4, 70.9, 68.7, 58.8, 49.7, 47.6, 44.4, 22.0, 21.9(2C), 21.8; LRMS (ESI): Mass calcd for C<sub>25</sub>H<sub>30</sub>O<sub>5</sub>Br [M+H]<sup>+</sup>, 489. Found [M+H]<sup>+</sup>, 489. Enantiomeric ratio was measured by chiral phase HPLC (Regis-Pirkle Welk-01, 30% *i*-PrOH/Hexanes, 0.50 mL/min, 210 nm), Rt (major) = 19.5 min, Rt (minor) = 4.6 min; ee = 96%.

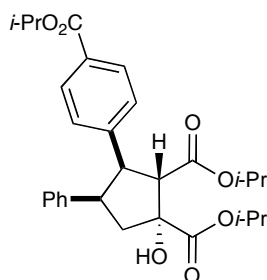

**(1R,2S,3R,4R)-diisopropyl 1-hydroxy-3-(4-(isopropoxycarbonyl)phenyl)-4-phenylcyclopentane-1,2-dicarboxylate (18):** Prepared according to the general procedure (except 6.0 eq of Ti(O*i*-Pr)<sub>4</sub> was used and the reaction mixture was stirred for 96 hrs to facilitate complete transesterification of all 3 esters) using (*E*)-methyl 4-(3-oxoprop-1-enyl)benzoate (46.4 mg, 0.244 mmol) and (*E*)-methyl 2-oxo-4-phenylbut-3-enoate (139 mg, 0.732 mmol) and purified by flash chromatography using 9% EtOAc/hexanes to afford 74 mg (61% yield) of **18** (18:1 dr) as a yellow oil. Analytical data for **18**: IR (film) 3499, 3062, 3030, 2981, 2937, 2876, 1738, 1714, 1611, 1497, 1467, 1454, 1374, 1277, 1242, 1181, 1104, 913, 829, 747, 701 cm<sup>-1</sup>; <sup>1</sup>H NMR (500 MHz; CDCl<sub>3</sub>): δ 7.71-7.69 (m, 2H), 7.07-7.00 (m, 3H), 6.97-6.94 (m, 4H), 5.25 (sep, *J* = 6.3 Hz, 1H), 5.16 (sep, *J* = 6.3 Hz, 1H), 4.95 (sep, *J* = 6.3 Hz, 1H), 4.31 (dd, *J* = 9.7, 9.7 Hz, 1H), 4.06 (ddd, *J* = 9.4, 7.6, 7.6 Hz, 1H), 3.96 (s, 1H), 3.83 (d, *J* = 9.7 Hz, 1H), 2.79 (dd, *J* = 13.6, 9.5 Hz, 1H), 2.40 (dd, *J* = 13.6, 7.4 Hz, 1H), 1.45 (d, *J* = 6.3 Hz, 3H), 1.43 (d, *J* = 6.2 Hz, 3H), 1.31 (d, *J* = 6.3 Hz, 6H), 1.15 (d, *J* = 6.2 Hz, 3H), 1.10 (d, *J* = 6.3 Hz, 3H); <sup>13</sup>C NMR (125 MHz; CDCl<sub>3</sub>): δ 174.6, 169.8, 166.2, 146.1, 140.6, 129.1(2C), 128.7, 128.6(2C), 128.4(2C), 128.0(2C), 126.4, 81.5, 70.9, 68.7, 68.3, 58.9, 50.1, 47.7, 44.5, 22.1(2C), 22.0, 21.9(2C), 21.8; LRMS (ESI): Mass calcd for C<sub>29</sub>H<sub>37</sub>O<sub>7</sub> [M+H]<sup>+</sup>, 497. Found [M+H]<sup>+</sup>, 497. Enantiomeric ratio was measured by chiral phase HPLC (Chiralcel OD-H, 5% *i*-PrOH/Hexanes, 0.50 mL/min, 210 nm), Rt (major) = 18.7 min, Rt (minor) = 23.5 min; ee = 91%.

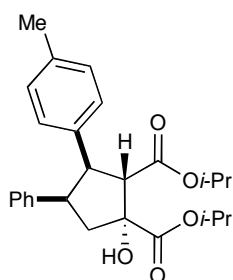

**(1R,2S,3R,4R)-diisopropyl 1-hydroxy-4-phenyl-3-*p*-tolylcyclopentane-1,2-dicarboxylate (19):** Prepared according to the general procedure using (*E*)-3-*p*-

tolylacrylaldehyde (35.7 mg, 0.244 mmol) and (*E*)-methyl 2-oxo-4-phenylbut-3-enoate (139 mg, 0.732 mmol) and purified by flash chromatography using 9% EtOAc/hexanes to afford 66 mg (63% yield) of **19** (20:1 dr) as a white solid. Analytical data for **19**: IR (film) 3505, 3058, 3028, 2981, 2937, 2876, 1734, 1603, 1515, 1497, 1454, 1375, 1323, 1241, 1183, 1107, 1035, 971, 911, 820, 750, 700, 641  $\text{cm}^{-1}$ ;  $^1\text{H}$  NMR (500 MHz;  $\text{CDCl}_3$ ):  $\delta$  7.07-6.99 (m, 3H), 6.95 (d,  $J = 7.1$  Hz, 2H), 6.84 (d,  $J = 8.0$  Hz, 2H), 6.79 (d,  $J = 8.1$  Hz, 2H), 5.25 (sep,  $J = 6.3$  Hz, 1H), 4.96 (sep,  $J = 6.3$  Hz, 1H), 4.22 (dd,  $J = 9.4, 9.4$  Hz, 1H), 4.02 (ddd,  $J = 9.7, 7.3, 7.3$  Hz, 1H), 3.97 (s, 1H), 3.81 (d,  $J = 9.1$  Hz, 1H), 2.79 (dd,  $J = 13.4, 10.1$  Hz, 1H), 2.35 (dd,  $J = 13.4, 7.1$  Hz, 1H), 2.17 (s, 3H), 1.45 (d,  $J = 6.3$  Hz, 3H), 1.42 (d,  $J = 6.2$  Hz, 3H), 1.17 (d,  $J = 6.2$  Hz, 3H), 1.10 (d,  $J = 6.3$  Hz, 3H);  $^{13}\text{C}$  NMR (125 MHz;  $\text{CDCl}_3$ ):  $\delta$  174.9, 170.2, 141.1, 137.7, 135.5, 128.61(2C), 128.56(2C), 128.5(2C), 127.7(2C), 126.0, 81.4, 70.7, 68.5, 59.3, 49.7, 47.8, 44.3, 22.0, 21.89(2C), 21.86, 21.1; LRMS (ESI): Mass calcd for  $\text{C}_{26}\text{H}_{33}\text{O}_5$   $[\text{M}+\text{H}]^+$ , 425. Found  $[\text{M}+\text{H}]^+$ , 425. Enantiomeric ratio was measured by chiral phase HPLC (Chiralcel OD-H, 5% *i*-PrOH/Hexanes, 0.50 mL/min, 210 nm),  $R_t$  (major) = 12.9 min,  $R_t$  (minor) = 16.9 min; ee = 97%.

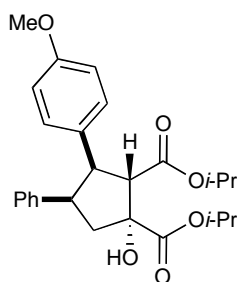

**(1R,2S,3R,4R)-diisopropyl 1-hydroxy-3-(4-methoxyphenyl)-4-phenylcyclopentane-1,2-dicarboxylate (20)**: Prepared according to the general procedure using (*E*)-3-(4-methoxyphenyl)acrylaldehyde (39.6 mg, 0.244 mmol) and (*E*)-methyl 2-oxo-4-phenylbut-3-enoate (139 mg, 0.732 mmol) and purified by flash chromatography using 9% EtOAc/hexanes to afford 60 mg (56% yield) of **20** (17:1 dr) as a yellow oil. Analytical data for **20**: IR (film) 3498, 3271, 3062, 3029, 2980, 2934, 2854, 1785, 1729, 1676, 1612, 1514, 1454, 1386, 1250, 1181, 1108, 1036, 971, 910, 829, 749, 702  $\text{cm}^{-1}$ ;  $^1\text{H}$  NMR (500 MHz;  $\text{CDCl}_3$ ):  $\delta$  7.04 (m, 3H), 6.94 (d,  $J = 7.1$  Hz, 2H), 6.80 (d,  $J = 8.6$  Hz, 2H), 6.57 (d,  $J = 8.7$  Hz, 2H), 5.24 (sep,  $J = 6.2$  Hz, 1H), 4.96 (sep,  $J = 6.2$  Hz, 1H), 4.20 (dd,  $J = 9.5, 9.5$  Hz, 1H), 3.99 (m, 2H), 3.77 (d,  $J = 9.4$  Hz, 1H), 3.68 (s, 3H), 2.77 (dd,  $J = 13.4, 9.9$  Hz, 1H), 2.35 (dd,  $J = 13.5, 7.2$  Hz, 1H), 1.44 (d,  $J = 6.3$  Hz, 3H), 1.42 (d,  $J = 6.2$  Hz, 3H), 1.16 (d,  $J = 6.2$  Hz, 3H), 1.09 (d,  $J = 6.3$  Hz, 3H);  $^{13}\text{C}$  NMR (125 MHz;  $\text{CDCl}_3$ ):  $\delta$  174.8, 170.3, 157.9, 141.1, 132.8, 129.7(2C), 128.6(2C), 127.8(2C), 126.1, 113.2(2C), 81.4, 70.7, 68.5, 59.1, 55.2, 49.5, 47.8, 44.3, 22.0, 21.89(2C), 21.86; LRMS (ESI): Mass calcd for  $\text{C}_{26}\text{H}_{33}\text{O}_6$   $[\text{M}+\text{H}]^+$ , 441. Found  $[\text{M}+\text{H}]^+$ , 441. Enantiomeric ratio was measured by chiral phase HPLC (Chiralcel AD-H, 5% *i*-PrOH/Hexanes, 0.75 mL/min, 210 nm),  $R_t$  (major) = 28.2 min,  $R_t$  (minor) = 16.7 min; ee = 96%.

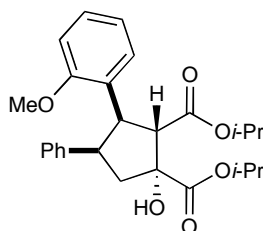

**(1R,2S,3R,4R)-diisopropyl 1-hydroxy-3-(2-methoxyphenyl)-4-phenylcyclopentane-1,2-dicarboxylate (21):** Prepared according to the general procedure using (*E*)-3-(2-methoxyphenyl)acrylaldehyde (39.6 mg, 0.244 mmol) and (*E*)-methyl 2-oxo-4-phenylbut-3-enoate (139 mg, 0.732 mmol) and purified by flash chromatography using 9% EtOAc/hexanes to afford 66 mg (62% yield) of **21** (5:1 dr) as a yellow oil. Analytical data for **21**: IR (film) 3484, 3068, 3030, 2981, 2935, 1784, 1665, 1602, 1495, 1466, 1454, 1387, 1366, 1293, 1266, 1108, 1032, 911, 830, 747, 701, 648  $\text{cm}^{-1}$ ;  $^1\text{H}$  NMR (500 MHz;  $\text{CDCl}_3$ ):  $\delta$  7.10-6.93 (m, 7H), 6.67 (t,  $J = 7.3$  Hz, 1H), 6.51 (d,  $J = 8.1$  Hz, 1H), 5.23 (sep,  $J = 6.2$  Hz, 1H), 4.97 (sep,  $J = 6.3$  Hz, 1H), 4.56-4.50 (m, 1H), 4.12 (ap q,  $J = 8.9$  Hz, 1H), 4.00-3.89 (m, 2H), 3.63 (s, 3H), 2.81-2.75 (m, 1H), 2.36 (dd,  $J = 13.0, 7.3$  Hz, 1H), 1.42 (d,  $J = 6.3$  Hz, 6H), 1.17 (d,  $J = 6.2$  Hz, 3H), 1.12 (d,  $J = 6.3$  Hz, 3H);  $^{13}\text{C}$  NMR (125 MHz;  $\text{CDCl}_3$ ):  $\delta$  174.9, 170.7, 157.0, 141.7, 128.8, 128.3(2C), 127.4, 127.2(2C), 125.7, 119.8, 109.7(2C), 81.8, 70.4, 68.4, 56.4, 54.7, 45.9, 44.6(2C), 22.0, 21.91, 21.90(2C); LRMS (ESI): Mass calcd for  $\text{C}_{26}\text{H}_{33}\text{O}_6$   $[\text{M}+\text{H}]^+$ , 441. Found  $[\text{M}+\text{H}]^+$ , 441. Enantiomeric ratio was measured by chiral phase HPLC (Regis-Pirkle Welk-01, 5% *i*-PrOH/Hexanes, 1.5 mL/min, 210 nm),  $R_t$  (major) = 25.8 min,  $R_t$  (minor) = 16.4 min; ee = 97%.

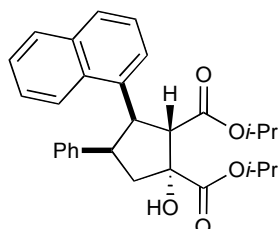

**(1R,2S,3R,4R)-diisopropyl 1-hydroxy-3-(naphthalen-1-yl)-4-phenylcyclopentane-1,2-dicarboxylate (22):** Prepared according to the general procedure using (*E*)-3-(naphthalen-1-yl)acrylaldehyde (44.5 mg, 0.244 mmol) and (*E*)-methyl 2-oxo-4-phenylbut-3-enoate (139 mg, 0.732 mmol) and purified by flash chromatography using 9% EtOAc/hexanes to afford 87 mg (78% yield) of **22** (12:1 dr) as a clear foam. Analytical data for **22**: IR (film) 3493, 3030, 2981, 2936, 2874, 1732, 1600, 1512, 1496, 1455, 1374, 1312, 1258, 1236, 1179, 1107, 911, 830, 777, 746, 700  $\text{cm}^{-1}$ ;  $^1\text{H}$  NMR (500 MHz;  $\text{CDCl}_3$ ):  $\delta$  8.26 (d,  $J = 8.5$  Hz, 1H), 7.71 (d,  $J = 8.0$  Hz, 1H), 7.54-7.49 (m, 2H), 7.42 (ddd,  $J = 8.1, 6.8, 1.0$  Hz, 1H), 7.09 (t,  $J = 7.7$  Hz, 1H), 6.90 (d,  $J = 7.2$  Hz, 1H), 6.83-6.81 (m, 3H), 6.79-6.77 (m, 2H), 5.28 (sep,  $J = 6.3$  Hz, 1H), 5.10 (dd,  $J = 11.6, 9.7$  Hz, 1H), 4.93 (sep,  $J = 6.2$  Hz, 1H), 4.21 (ddd,  $J = 9.2, 7.1, 7.1$  Hz, 1H), 4.10 (s, 1H), 4.08 (d,  $J = 11.8$  Hz, 1H), 2.85 (dd,  $J = 14.4, 7.0$  Hz, 1H), 2.62 (dd,  $J = 14.4, 8.5$  Hz, 1H), 1.49 (d,  $J = 6.2$  Hz, 3H), 1.47 (d,  $J = 6.3$  Hz, 3H), 1.12 (d,  $J = 6.2$  Hz, 3H), 1.07 (d,  $J = 6.3$  Hz, 3H);  $^{13}\text{C}$  NMR (125 MHz;  $\text{CDCl}_3$ ):  $\delta$  174.7, 170.2, 141.9, 135.7, 133.6, 132.4,

128.6, 128.2(2C), 127.4(2C), 126.8, 126.0, 125.8, 125.3, 124.6, 124.0, 123.9, 81.6, 70.8, 68.6, 56.8, 46.7, 45.8, 45.7, 22.03, 21.96, 21.9, 21.8; LRMS (ESI): Mass calcd for  $C_{29}H_{33}O_5$   $[M+H]^+$ , 461. Found  $[M+H]^+$ , 461. Enantiomeric ratio was measured by chiral phase HPLC (Chiralcel AD-H, 5% *i*-PrOH/Hexanes, 1.0 mL/min, 210 nm), Rt (major) = 24.4 min, Rt (minor) = 18.4 min; ee = 97%.

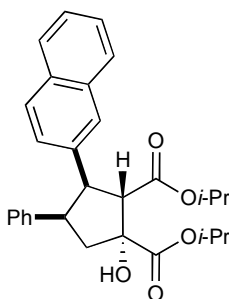

**(1R,2S,3R,4R)-diisopropyl 1-hydroxy-3-(naphthalen-1-yl)-4-phenylcyclopentane-1,2-dicarboxylate (23):** Prepared according to the general procedure using (*E*)-3-(naphthalen-1-yl)acrylaldehyde (44.5 mg, 0.244 mmol) and (*E*)-methyl 2-oxo-4-phenylbut-3-enoate (139 mg, 0.732 mmol) and purified by flash chromatography using 9% EtOAc/hexanes to afford 86 mg (77% yield) of **23** (16:1 dr) as a yellow oil. Analytical data for **23**: IR (film) 3504, 3058, 3028, 2980, 2936, 2877, 1734, 1602, 1508, 1454, 1375, 1242, 1221, 1182, 1107, 1035, 911, 747, 699  $cm^{-1}$ ;  $^1H$  NMR (500 MHz;  $CDCl_3$ ):  $\delta$  7.65 (dd,  $J = 7.6, 1.7$  Hz, 2H), 7.48-7.46 (m, 2H), 7.39-7.33 (m, 2H), 6.98-6.97 (m, 4H), 6.96-6.91 (m, 2H), 5.29 (sep,  $J = 6.3$  Hz, 1H), 4.96 (sep,  $J = 6.3$  Hz, 1H), 4.44 (dd,  $J = 9.5, 9.5$  Hz, 1H), 4.14 (ddd,  $J = 9.8, 7.2, 7.2$  Hz, 1H), 4.04 (s, 1H), 3.95 (d,  $J = 9.3$  Hz, 1H), 2.88 (dd,  $J = 13.5, 9.9$  Hz, 1H), 2.43 (dd,  $J = 13.5, 7.2$  Hz, 1H), 1.49 (d,  $J = 6.3$  Hz, 3H), 1.46 (d,  $J = 6.2$  Hz, 3H), 1.16 (d,  $J = 6.2$  Hz, 3H), 1.07 (d,  $J = 6.3$  Hz, 3H);  $^{13}C$  NMR (125 MHz;  $CDCl_3$ ):  $\delta$  174.8, 170.2, 140.8, 138.4, 133.2, 132.0, 128.5(2C), 127.8(2C), 127.7, 127.5, 127.3, 127.25, 127.21, 126.1, 125.7, 125.3, 81.5, 70.8, 68.6, 59.1, 50.2, 47.8, 44.5, 22.0, 21.9, 21.87, 21.86; LRMS (ESI): Mass calcd for  $C_{29}H_{33}O_5$   $[M+H]^+$ , 461. Found  $[M+H]^+$ , 461. Enantiomeric ratio was measured by chiral phase HPLC (Chiralcel AD-H, 5% *i*-PrOH/Hexanes, 1.0 mL/min, 210 nm), Rt (major) = 18.5 min, Rt (minor) = 14.6 min; ee = 96%.

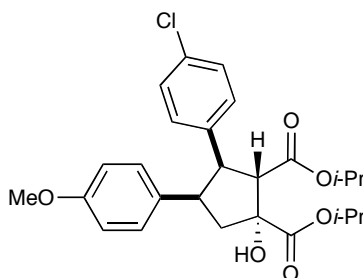

**(1R,2S,3R,4R)-diisopropyl 3-(4-chlorophenyl)-1-hydroxy-4-(4-methoxyphenyl)cyclopentane-1,2-dicarboxylate (24):** Prepared according to the general procedure using (*E*)-3-(4-Chloro-phenyl)-propenal (40.6 mg, 0.244 mmol) and (*E*)-methyl 2-oxo-4-

phenylbut-3-enoate (139 mg, 0.732 mmol) and purified by flash chromatography using 9% EtOAc/hexanes to afford 91 mg (78% yield) of **24** (20:1 dr) as an orange oil. Analytical data for **24**: IR (film) 3500, 3061, 3032, 2981, 2936, 2837, 1735, 1612, 1514, 1494, 1466, 1454, 1375, 1251, 1180, 1107, 1037, 1015, 971, 910, 830, 746, 704  $\text{cm}^{-1}$ ;  $^1\text{H}$  NMR (500 MHz;  $\text{CDCl}_3$ ):  $\delta$  7.03-7.00 (m, 2H), 6.86-6.80 (m, 4H), 6.63-6.60 (m, 2H), 5.24 (sep,  $J = 6.3$  Hz, 1H), 4.95 (sep,  $J = 6.3$  Hz, 1H), 4.17 (dd,  $J = 9.7, 9.7$  Hz, 1H), 3.97-3.91 (m, 2H), 3.74 (d,  $J = 9.8$  Hz, 1H), 3.71 (s, 3H), 2.71 (dd,  $J = 13.7, 9.3$  Hz, 1H), 2.37 (dd,  $J = 13.7, 7.5$  Hz, 1H), 1.44 (d,  $J = 6.7$  Hz, 3H), 1.42 (d,  $J = 6.7$  Hz, 3H), 1.15 (d,  $J = 6.2$  Hz, 3H), 1.09 (d,  $J = 6.3$  Hz, 3H);  $^{13}\text{C}$  NMR (125 MHz;  $\text{CDCl}_3$ ):  $\delta$  174.7, 170.0, 157.9, 139.3, 132.8, 131.8, 130.0(2C), 129.4(2C), 127.9(2C), 113.3(2C), 81.3, 70.8, 68.6, 58.7, 55.3, 49.7, 46.9, 44.7, 22.0, 21.9(2C), 21.8; LRMS (ESI): Mass calcd for  $\text{C}_{26}\text{H}_{32}\text{O}_6\text{Cl}$   $[\text{M}+\text{H}]^+$ , 475. Found  $[\text{M}+\text{H}]^+$ , 475. Enantiomeric ratio was measured by chiral phase HPLC (Chiralcel OD-H, 5% *i*-PrOH/Hexanes, 0.50 mL/min, 210 nm),  $R_t$  (major) = 22.7 min,  $R_t$  (minor) = 17.3 min; ee = 97%.

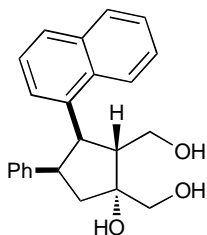

**(1R,2R,3R,4R)-1-hydroxy-3,4-diphenylcyclopentane-1,2-diyl)dimethanol (25)**: Into a flame-dried 50 mL round bottom flask equipped with a magnetic stirbar was weighed bis-ester **22** (>20:1 dr), (430 mg, 0.935 mmol). The flask was purged with  $\text{N}_2$  and THF (19 mL, 0.05M) was added under positive  $\text{N}_2$  pressure. The mixture was cooled at 0  $^\circ\text{C}$  and  $\text{LiAlH}_4$  (355 mg, 9.35 mmol) was added in small portions. The reaction mixture was stirred at 0  $^\circ\text{C}$  for 30 min and at 25  $^\circ\text{C}$  for 16h. The mixture was then slowly quenched with the addition of water until gas evolution ceased. The mixture was transferred into an extraction funnel containing 100 mL of 1M HCl solution. The aqueous phase was extracted with EtOAc (3x), and the combined organic extracts were dried over  $\text{Na}_2\text{SO}_4$ , filtered and concentrated under reduced pressure. The crude mixture was purified by flash chromatography using 80% EtOAc/hexanes to 100% EtOAc to afford 245 mg (75% yield) of **25** as a white solid. Analytical data for **25**: IR (film) 3324 (broad), 3060, 3029, 2939, 2907, 1736 (weak), 1455, 1263, 1030, 778, 701  $\text{cm}^{-1}$ ;  $^1\text{H}$  NMR (500 MHz;  $\text{CDCl}_3$ ):  $\delta$  8.17 (d,  $J = 8.5$  Hz, 1H), 7.73-7.70 (m, 1H), 7.54-7.47 (m, 2H), 7.42 (ddd,  $J = 1.0, 6.8, 8.0$  Hz, 1H), 7.10 (t,  $J = 7.7$  Hz, 1H), 6.88 (d,  $J = 7.2$  Hz, 1H), 6.82-6.78 (m, 3H), 6.64-6.60 (m, 2H), 4.43 (dd,  $J = 9.8, 12.5$  Hz, 1H), 4.12 (s broad, 1H), 4.05 (ddd,  $J = 6.8, 9.3$  Hz, 1H), 4.00 (d,  $J = 11.3$  Hz, 1H), 3.84 (d,  $J = 11.2$  Hz, 1H), 3.77 (ddd,  $J = 9.3, 10.9, 10.9$  Hz, 1H), 3.73 (dd,  $J = 3.2, 10.9$  Hz, 1H), 3.33 (d,  $J = 1.0$  Hz, 1H), 2.75 (ddd,  $J = 3.2, 8.9, 12.3$  Hz, 1H), 2.48 (dd,  $J = 8.9, 14.8$  Hz, 1H), 2.44 (s broad, 1H), 2.25 (d,  $J = 6.7, 15.2$  Hz, 1H);  $^{13}\text{C}$  NMR (125 MHz;  $\text{CDCl}_3$ ):  $\delta$  142.5, 135.6, 133.4, 132.5, 128.6, 128.1(2C), 127.2(2C), 126.5, 125.7, 125.6, 125.2, 124.7, 124.0, 123.6, 80.7, 68.5, 60.3, 52.9, 45.6, 45.4, 44.0; LRMS (ESI): Mass calcd for  $\text{C}_{23}\text{H}_{24}\text{O}_3\text{Na}$   $[\text{M}+\text{Na}]^+$ , 371. Found  $[\text{M}+\text{H}]^+$ , 371.



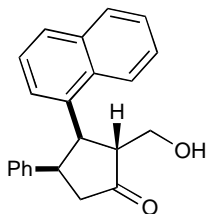

**(2R,3R,4R)-2-(hydroxymethyl)-3-(naphthalen-1-yl)-4-phenylcyclopentanone (26):**

Into a flame-dried 10 mL round bottom flask equipped with a magnetic stirbar was weighed triol **25** (90 mg, 0.258 mmol). The flask was purged with N<sub>2</sub> and CH<sub>2</sub>Cl<sub>2</sub> (4 mL) was added under positive N<sub>2</sub> pressure. NaIO<sub>4</sub> adsorbed onto silica gel (520 mg of a 1 mmol NaIO<sub>4</sub>/g SiO<sub>2</sub>, 4 equiv.)<sup>8</sup> was added to the solution and stirring was maintained at 25 °C until TLC analysis indicated complete conversion of the triol (5-16h). The mixture was then filtered over a short plug of SiO<sub>2</sub>, washed with EtOAc and concentrated under reduced pressure. The crude mixture was purified by flash chromatography using 20% EtOAc/hexanes to 40% EtOAc/hexanes to afford 57 mg (69% yield) of **26** as a colorless gum. Analytical data for **26**: IR (film) 3447 (broad), 3060, 3031, 2930, 2881, 1736, 779, 733, 700 cm<sup>-1</sup>; <sup>1</sup>H NMR (500 MHz; CDCl<sub>3</sub>): δ 8.30 (d, *J* = 8.5 Hz, 1H), 7.90 (d, *J* = 8.0 Hz, 1H), 7.66 (d, *J* = 8.2 Hz, 1H), 7.64 (ddd, *J* = 1.3, 6.9, 8.4 Hz, 1H), 7.55 (ddd, *J* = 0.9, 6.8, 7.9 Hz, 1H), 7.08 (t, *J* = 7.7 Hz, 1H), 7.05-7.00 (m, 1H), 6.97-6.92 (m, 2H), 6.52 (d, *J* = 7.2 Hz, 1H), 6.43-6.39 (m, 2H), 4.58 (dd, *J* = 6.7, 13.3 Hz, 1H), 4.13 (dt, *J* = 2.9, 6.6 Hz, 1H), 3.96 (ddd, *J* = 3.8, 7.7, 11.4 Hz, 1H), 3.70-3.65 (m, 1H), 3.11 (ddd, *J* = 4.2, 5.6, 13.2 Hz, 1H), 3.03-3.00 (m, 2H), 2.49-2.42 (m, 1H); <sup>13</sup>C NMR (125 MHz; CDCl<sub>3</sub>): δ 220.6, 139.8, 133.8, 133.3, 132.1, 129.2, 127.7(2C), 127.5(2C), 127.4, 126.5, 126.4, 125.6, 124.9, 123.3, 122.7, 60.2, 50.6, 45.1, 44.3, 43.4; LRMS (ESI): Mass calcd for C<sub>22</sub>H<sub>21</sub>O<sub>2</sub> [M+H]<sup>+</sup>, 317. Found [M+H]<sup>+</sup>, 317.

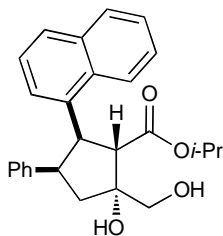

**(1S,2R,4R,5R)-isopropyl 2-hydroxy-2-(hydroxymethyl)-5-(naphthalen-1-yl)-4-phenylcyclopentanecarboxylate (27):**

Into an oven-dried vial equipped with a magnetic stirbar was weighed bis-ester **22** (>20:1 dr), (50 mg, 0.11 mmol). The vial was purged with N<sub>2</sub> and THF (1.2 mL) and MeOH (0.6 mL) were added under positive N<sub>2</sub> pressure. The solution was cooled to 0 °C and NaBH<sub>4</sub> (62 mg, 1.62 mmol) was added in one portion. The mixture was stirred at 0 °C for 1hr before an additional 5 equiv. of NaBH<sub>4</sub> (21 mg, 0.54 mmol) was added. The mixture was stirred an additional 30 min at 0 °C, after which time TLC analysis indicated complete conversion of the bis-ester. The reaction mixture was slowly quenched with 1M HCl, and the aqueous phase was extracted with EtOAc (3x). The combined organic layers were dried over Na<sub>2</sub>SO<sub>4</sub>, filtered and concentrated under reduced pressure. <sup>1</sup>H NMR analysis of the crude indicated

8) Zhong, Y.-L.; Shing, T. K. M. *J. Org. Chem.* **1997**, *62*, 2622-2624.

regioselective reduction (>20:1) and a 4:1 ratio (diol **27**:triol **25**). The crude mixture was purified by flash chromatography using 30% EtOAc/hexanes to 50% EtOAc/hexanes to afford 31 mg (71% yield) of **27** as a colorless gum. Analytical data for **27**: IR (film) 3437 (broad), 3060, 3029, 2937, 2874, 1703, 1384, 1106, 699  $\text{cm}^{-1}$ ;  $^1\text{H}$  NMR (500 MHz;  $\text{CDCl}_3$ ):  $\delta$  8.21 (d,  $J = 8.5$  Hz, 1H), 7.71 (d,  $J = 8.0$  Hz, 1H), 7.54 (ddd,  $J = 1.3, 6.8, 8.4$  Hz, 1H), 7.49 (d,  $J = 8.2$  Hz, 1H), 7.43 (ddd,  $J = 1.0, 6.8, 7.9$  Hz, 1H), 7.07 (t,  $J = 7.7$  Hz, 1H), 6.96 (d,  $J = 7.2$  Hz, 1H), 6.84-6.79 (m, 3H), 6.66-6.63 (m, 2H), 5.04 (dd,  $J = 9.6, 12.6$  Hz, 1H), 4.92 (sep,  $J = 6.3$  Hz, 1H), 4.51 (d,  $J = 1.0$  Hz, 1H), 4.19 (ddd,  $J = 6.3, 9.2$  Hz, 1H), 3.93 (dd,  $J = 6.2, 11.3$  Hz, 1H), 3.89 (dd,  $J = 6.3, 11.3$  Hz, 1H), 3.58 (d,  $J = 12.6$  Hz, 1H), 2.58 (dd,  $J = 8.9, 14.7$  Hz, 1H), 2.39 (t,  $J = 6.3$  Hz, 1H), 2.29 (ddd,  $J = 0.9, 6.3, 14.8$  Hz, 1H), 1.14 (d,  $J = 6.2$  Hz, 3H), 0.97 (d,  $J = 6.3$  Hz, 3H);  $^{13}\text{C}$  NMR (125 MHz;  $\text{CDCl}_3$ ):  $\delta$  174.5, 142.1, 134.4, 133.3, 132.2, 128.5, 128.0(2C), 127.3(2C), 126.8, 125.8, 125.7, 125.2, 124.4(2C), 123.7, 81.9, 68.9, 68.8, 53.0, 48.3, 46.1, 43.3, 21.5(2C); LRMS (ESI): Mass calcd for  $\text{C}_{26}\text{H}_{29}\text{O}_4$   $[\text{M}+\text{H}]^+$ , 405. Found  $[\text{M}+\text{H}]^+$ , 405.

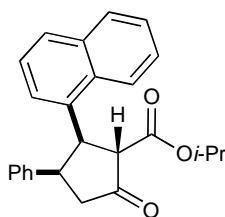

**(2R,3R)-isopropyl 2-(naphthalen-1-yl)-5-oxo-3-phenylcyclopentanecarboxylate (30)**:  $\beta$ -ketoester **30** was prepared from diol **27** (14.6 mg, 0.036 mmol) by the same procedure described for compound **26**. The crude reaction mixture was purified by flash chromatography using 5% EtOAc/hexanes to 7.5% EtOAc/hexanes to afford 13.5 mg (74% yield) of **30** as a colorless gum and 12:1 (keto:enol).  $^1\text{H}$  NMR (500 MHz;  $\text{CDCl}_3$ ): **keto**:  $\delta$  8.30 (d,  $J = 8.5$  Hz, 1H), 7.87 (d,  $J = 8.1$  Hz, 1H), 7.67-7.60 (m, 2H), 7.56-7.52 (m, 1H), 7.09 (t,  $J = 7.7$  Hz, 1H), 7.04-7.00 (m, 1H), 6.96-6.91 (m, 2H), 6.57 (d,  $J = 7.2$  Hz, 1H), 6.42-6.39 (m, 2H), 5.06 (dd,  $J = 6.6, 12.9$  Hz, 1H), 4.97 (sep,  $J = 6.2$  Hz, 1H), 4.21 (ddd,  $J = 1.1, 6.5, 7.9$  Hz, 1H), 3.95 (d,  $J = 12.8$  Hz, 1H), 3.15 (dd,  $J = 8.2, 19.0$  Hz, 1H), 3.02 (td,  $J = 0.9, 19.0$  Hz, 1H), 1.20 (d,  $J = 6.2$  Hz, 3H), 1.11 (d,  $J = 6.3$  Hz, 3H); **enol (key signals)**: 11.00 (s broad, 1H), 7.79 (d,  $J = 8.6$  Hz, 1H), 7.30-7.27 (m, 1H), 7.19 (ddd,  $J = 1.3, 6.9, 8.2$  Hz, 1H), 7.14 (d,  $J = 7.0$  Hz, 1H), 6.75-6.69 (m, 3H), 6.68-6.65 (m, 2H), 5.23 (d,  $J = 8.7$  Hz, 1H), 3.06 (ddd,  $J = 1.2, 10.9, 17.8$  Hz, 1H), 2.91 (dd,  $J = 8.6, 17.7$  Hz, 1H), 1.05 (d,  $J = 6.2$  Hz, 3H).

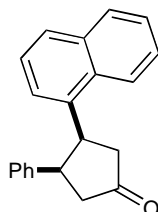

**(3S,4R)-3-(naphthalen-1-yl)-4-phenylcyclopentanone (28)**: Into a tube equipped with a magnetic stirbar was weighed  $\beta$ -ketoester **30** (19 mg, 0.051 mmol). The tube was purged

with N<sub>2</sub> and DMSO (1.0 mL) and H<sub>2</sub>O (0.25 mL) were added under positive N<sub>2</sub> pressure. The solution was heated to 130 °C for 3 hours, after which time TLC analysis indicated complete conversion. The mixture was transferred into an extraction funnel containing brine. The aqueous phase was extracted with EtOAc (3x) and the combined organic layers were dried over Na<sub>2</sub>SO<sub>4</sub>, filtered and concentrated under reduced pressure. The crude mixture was purified by flash chromatography using 5% EtOAc/hexanes to 10% EtOAc/hexanes to afford 14 mg (96% yield) of **28** as a colorless gum. Analytical data for **27**: IR (film) 3059, 3048, 2959, 2850, 1740, 1261, 798, 702 cm<sup>-1</sup>; <sup>1</sup>H NMR (500 MHz; CDCl<sub>3</sub>): δ 8.12-8.08 (m, 1H), 7.86-7.82 (m, 1H), 7.66 (d, *J* = 8.2 Hz, 1H), 7.52-7.45 (m, 2H), 7.17 (t, *J* = 7.7 Hz, 1H), 7.00-6.96 (m, 1H), 6.93-6.88 (m, 2H), 6.71 (d, *J* = 7.2 Hz, 1H), 6.47-6.44 (m, 2H), 4.71 (ddd, *J* = 7.0, 7.0, 10.6 Hz, 1H), 4.16 (ddd, *J* = 6.4, 6.4, 6.4 Hz, 1H), 2.97 (dd, *J* = 10.6, 18.3 Hz, 1H), 2.92 (d, *J* = 1.8 Hz, 1H), 2.91 (s, 1H), 2.65 (dd, *J* = 7.3, 18.3 Hz, 1H); <sup>13</sup>C NMR (125 MHz; CDCl<sub>3</sub>): δ 218.3, 139.4, 134.8, 133.6, 132.0, 128.9, 127.62(2C), 127.56(2C), 127.3, 126.5, 126.0, 125.4, 124.8, 123.5, 123.0, 45.7, 44.8, 42.5, 41.6; LRMS (EI): Mass calcd for C<sub>21</sub>H<sub>18</sub>O [M]<sup>+</sup>, 286. Found [M]<sup>+</sup>, 286.

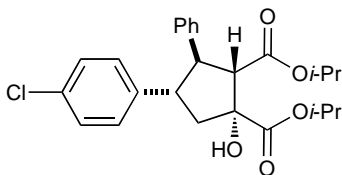

**(1R,2S,3R,4S)-diisopropyl 4-(4-chlorophenyl)-1-hydroxy-3-phenylcyclopentane-1,2-dicarboxylate (29)**: A screw-capped vial equipped with a magnetic stirbar was charged with azolium precatalyst **E** (42 mg, 0.098 mmol, 0.2 equiv.) and *E*-methyl 4-(4-chlorophenyl)-2-oxobut-3-enoate (330 mg, 1.47 mmol, 3.0 equiv.). The vial was capped with a septum cap, removed from the drybox and put under positive N<sub>2</sub> pressure. Into the vial were then successively added cinnamaldehyde (61.5 μL, 0.489 mmol, 1.0 equiv.), THF (1.0 mL, 0.50 M), Ti(O*i*Pr)<sub>4</sub> (297 μL, 0.978 mmol, 2.0 equiv.) and finally DBU (29 μL, 0.195 mmol, 0.4 equiv.) via a syringe. Upon consumption of the aldehyde (24 hours), 3 equiv. of Ti(O*i*Pr)<sub>4</sub> (350 μL) were added and stirring was maintained for an additional 48 hours to allow for complete transesterification. The reaction mixture was filtered through a short plug of SiO<sub>2</sub> and washed with EtOAc. The solution was concentrated under reduced pressure and analysis of the <sup>1</sup>H NMR of the crude indicated 9:1 dr (**4:29**). The crude reaction mixture was purified by flash chromatography using 93% EtOAc/hexanes to afford a 1:10 mixture (**4:29**) of diastereoisomers. This mixture was further purified by flash chromatography using 5% Et<sub>2</sub>O/hexanes to 20% Et<sub>2</sub>O/hexanes affording 5.8 mg of **29** as a white solid. An X-ray of a crystal was obtained for compound **29** (see below) after recrystallization from hexanes. Analytical data for **29**: <sup>1</sup>H NMR (500 MHz; CDCl<sub>3</sub>): δ 7.25-7.20 (m, 2H), 7.19-7.15 (m, 3H), 7.15-7.11 (m, 4H), 5.20 (sep, *J* = 6.3 Hz, 1H), 4.90 (sep, *J* = 6.1 Hz, 1H), 4.09 (s, 1H), 3.71 (dd, *J* = 11.7, 11.7 Hz, 1H), 3.52 (d, *J* = 12.4 Hz, 1H), 3.34 (ddd, *J* = 8.2, 10.6, 10.6 Hz, 1H), 2.87 (dd, *J* = 10.5, 14.4 Hz, 1H), 2.15 (dd, *J* = 7.5, 14.5 Hz, 1H), 1.38 (d, *J* = 6.4 Hz, 3H), 1.37 (d, *J* = 6.2 Hz, 3H), 1.11 (d, *J* = 6.2 Hz, 3H), 1.03 (d, *J* = 6.1 Hz, 3H).

## Selected NMR Spectra

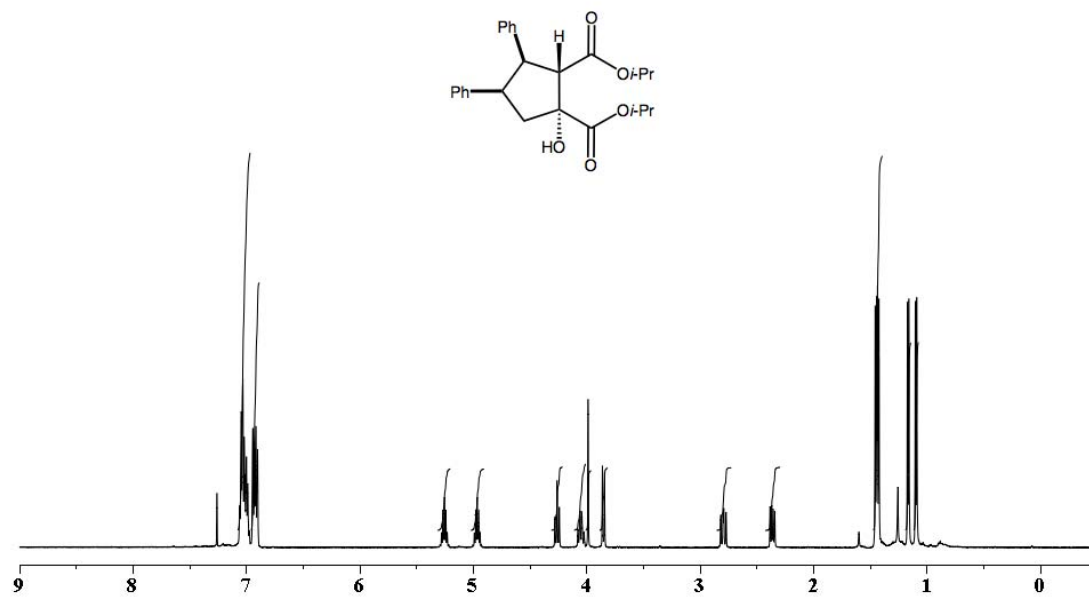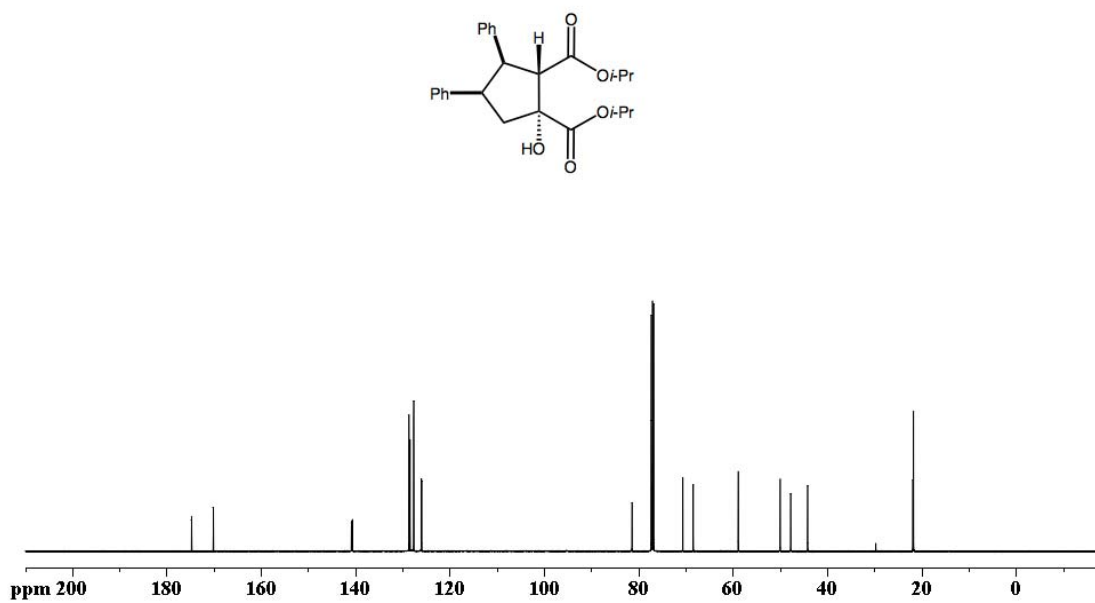

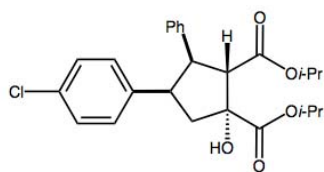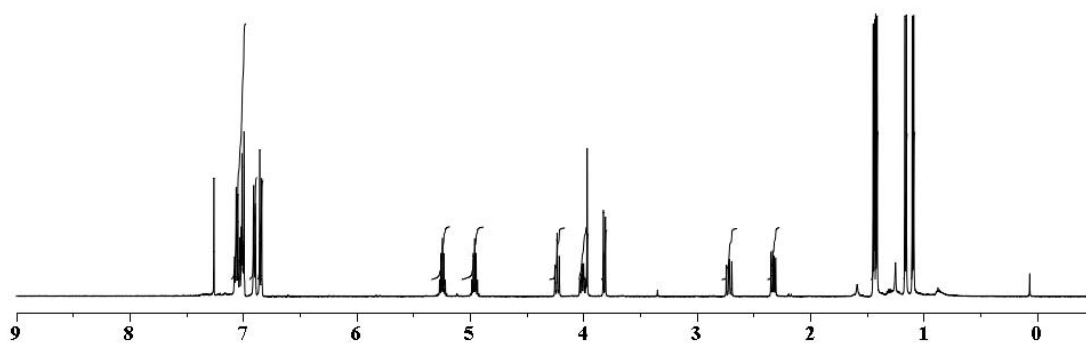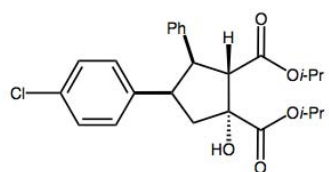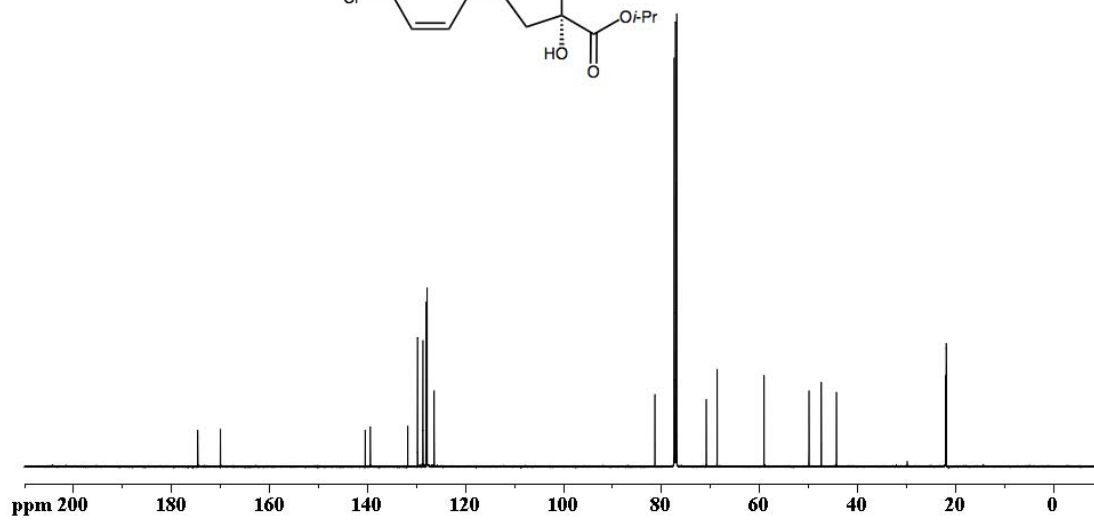

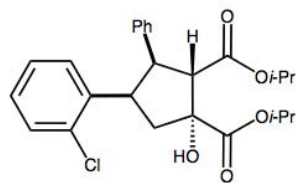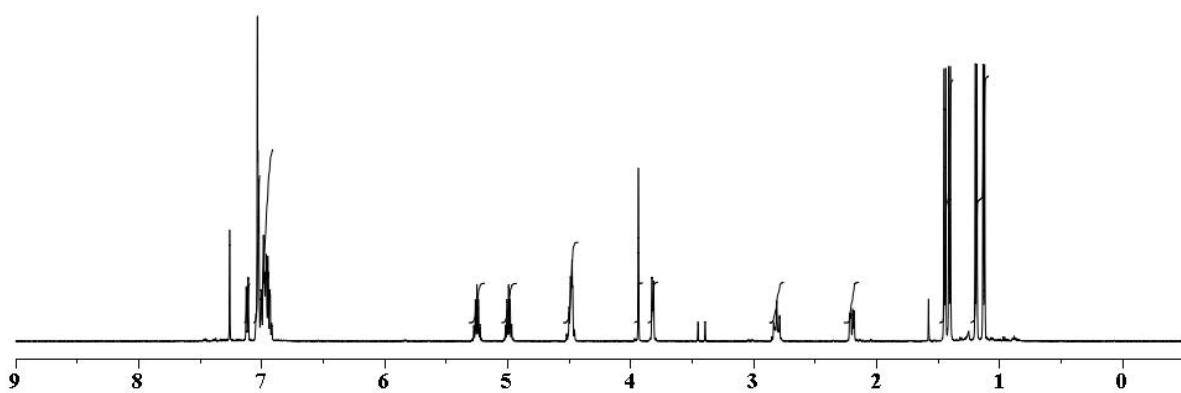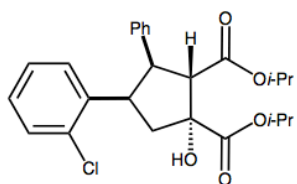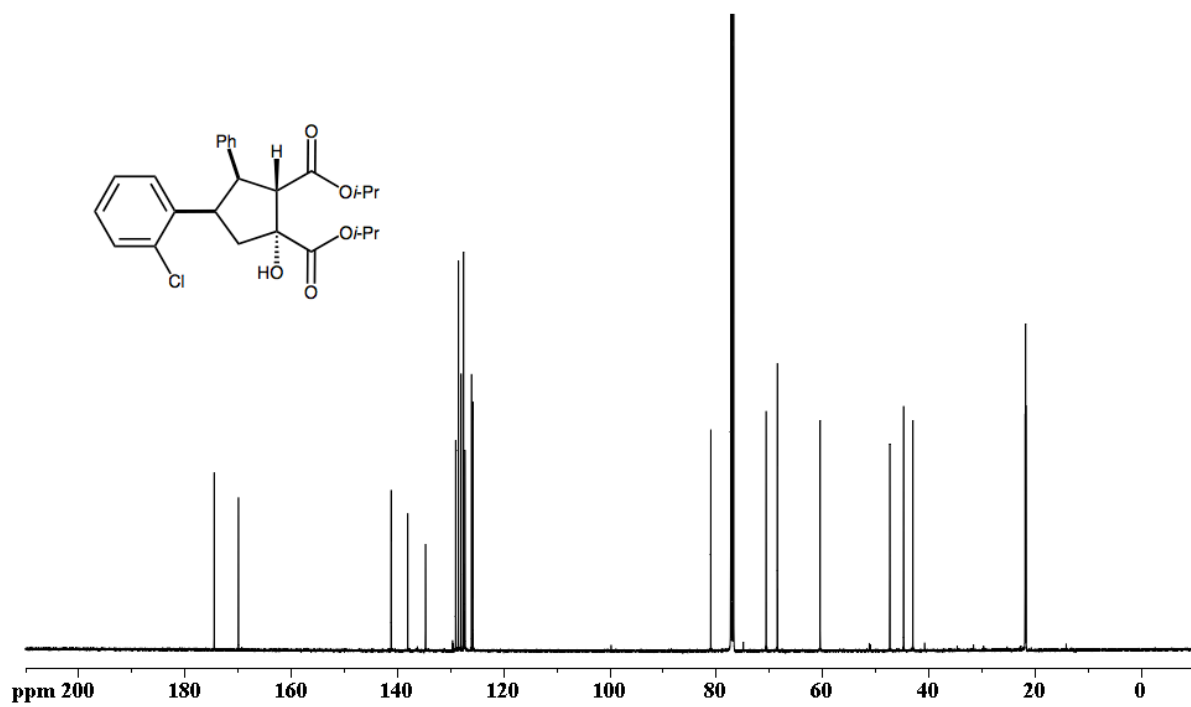

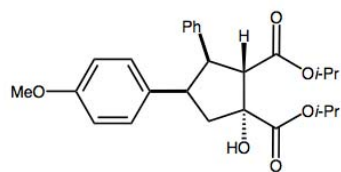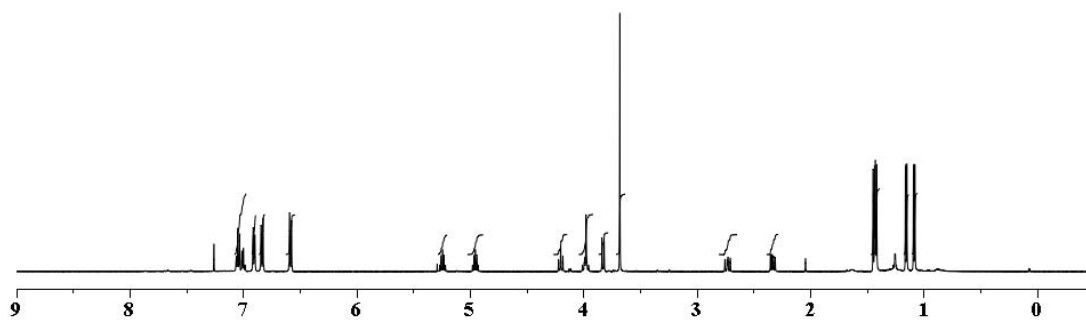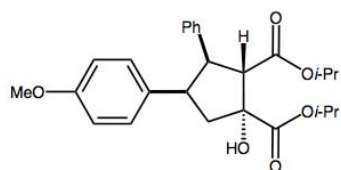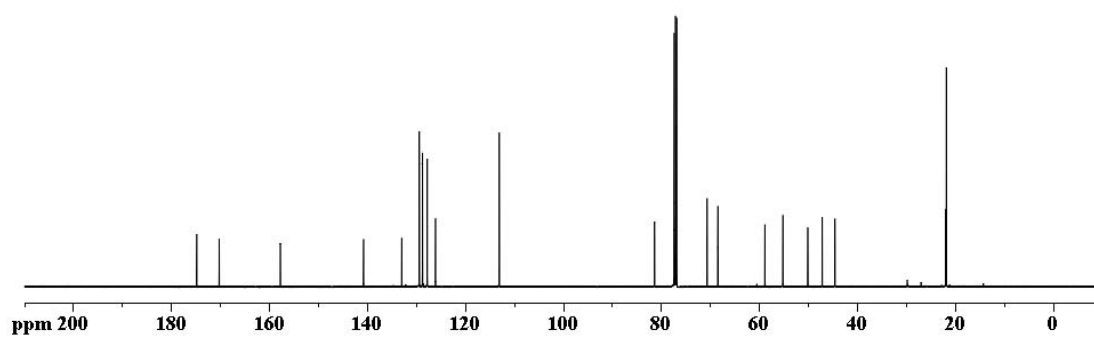

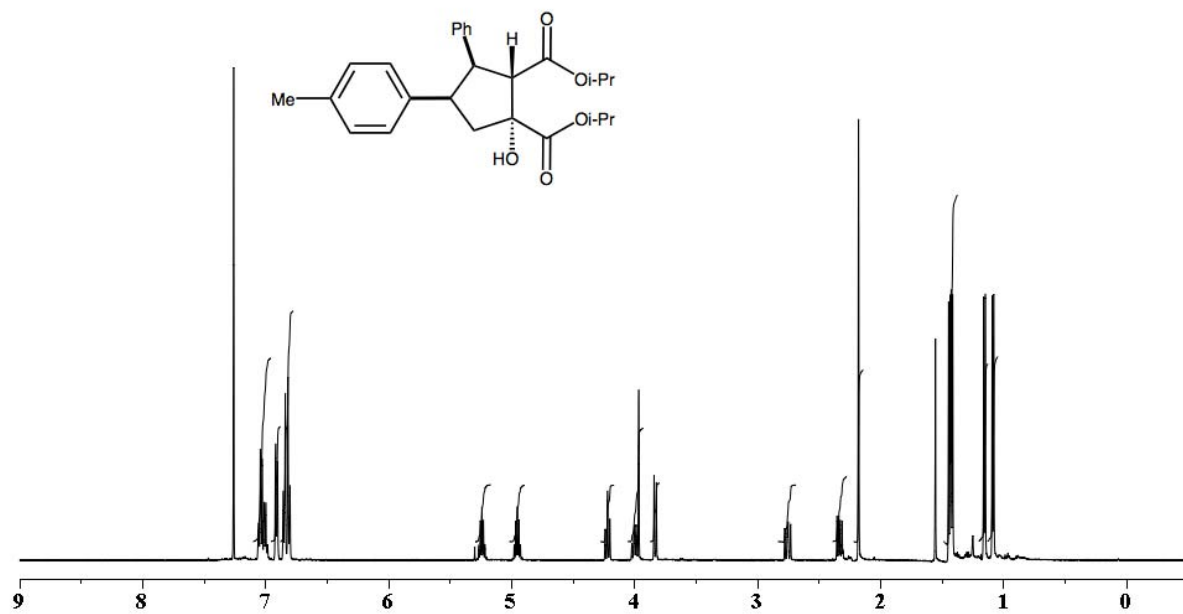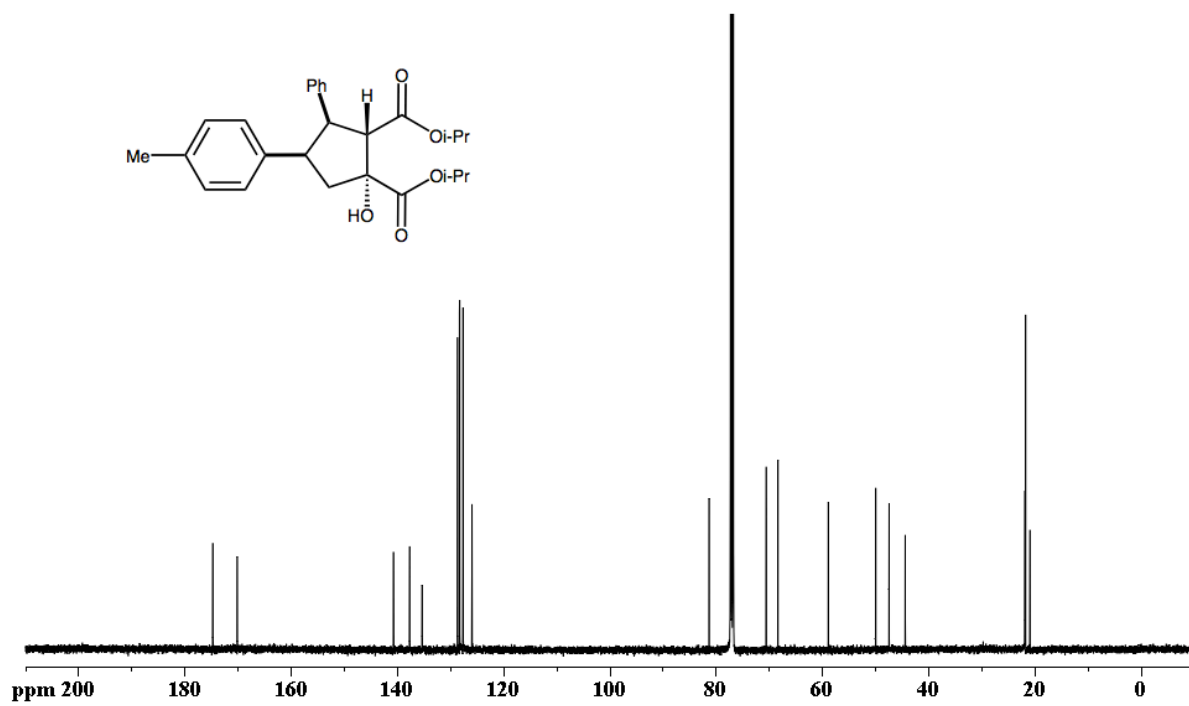



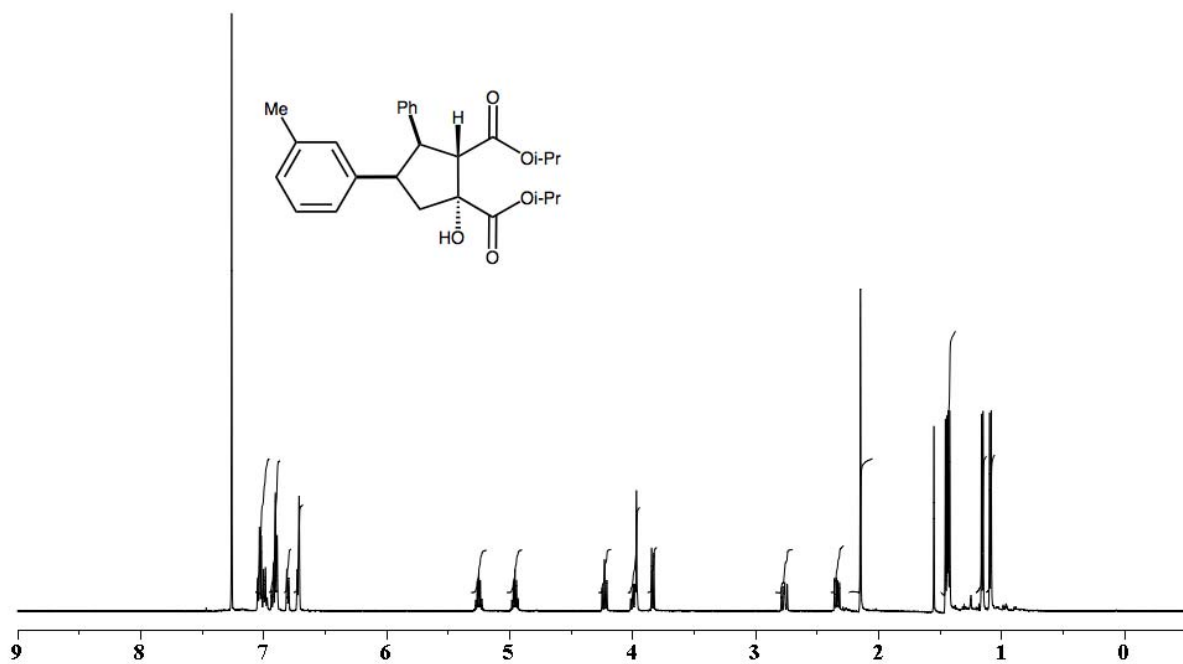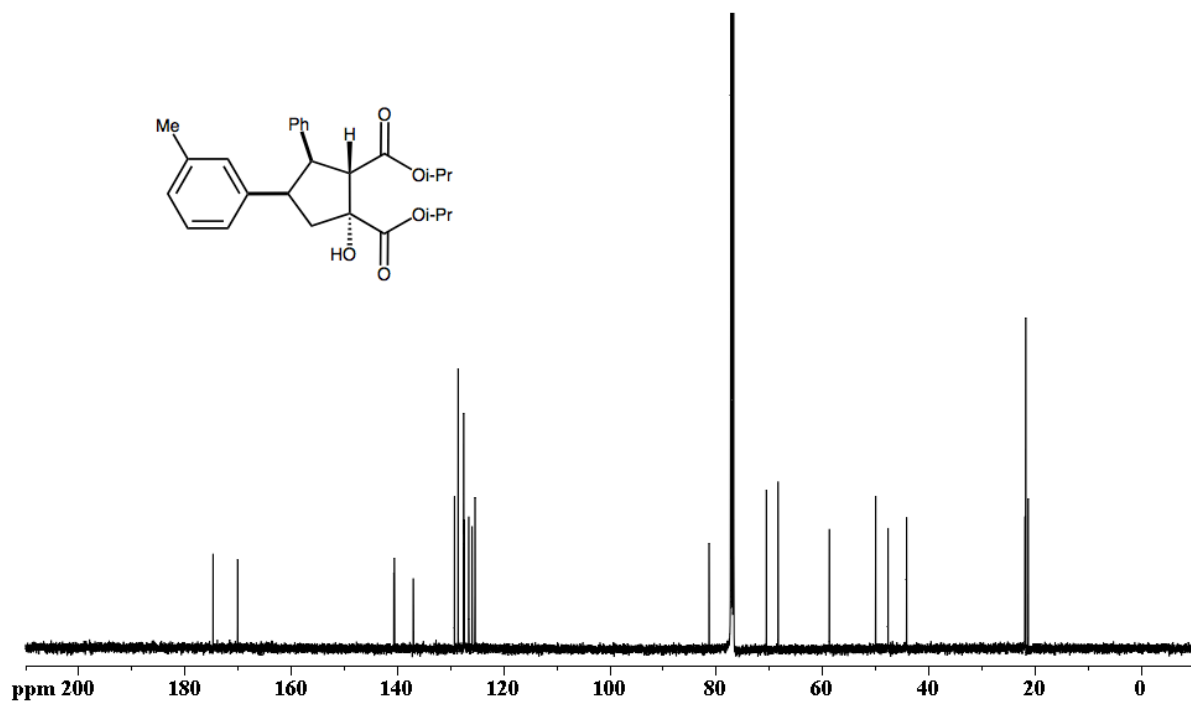

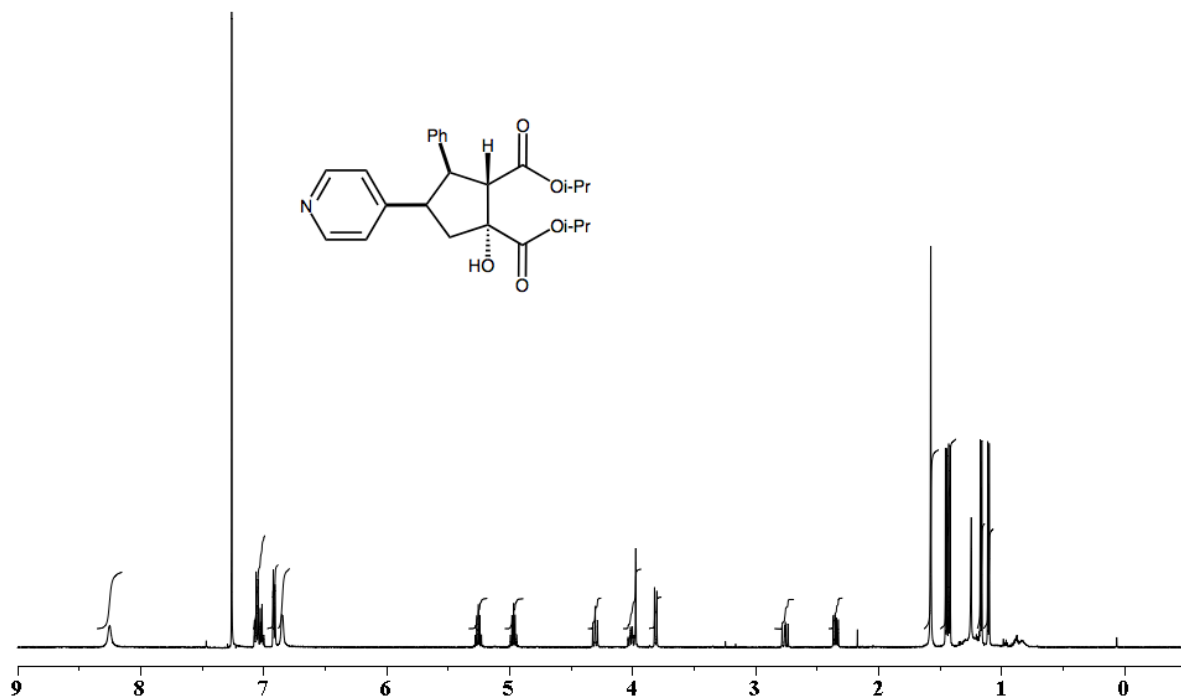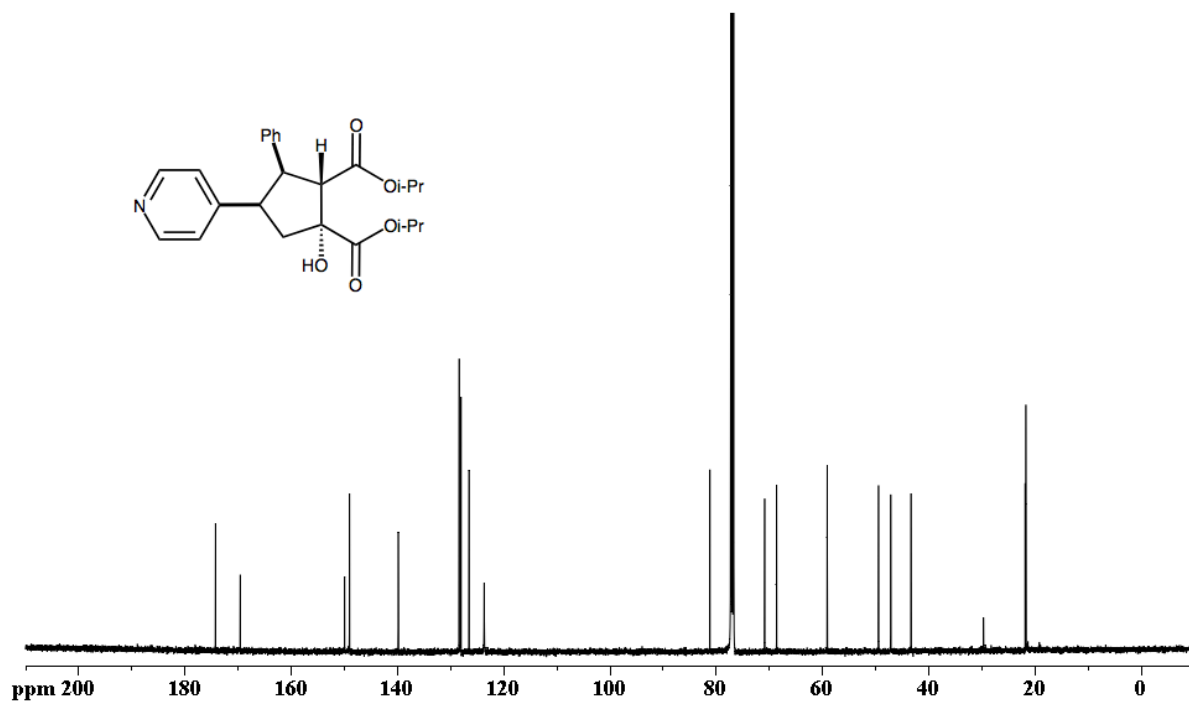

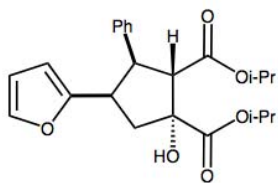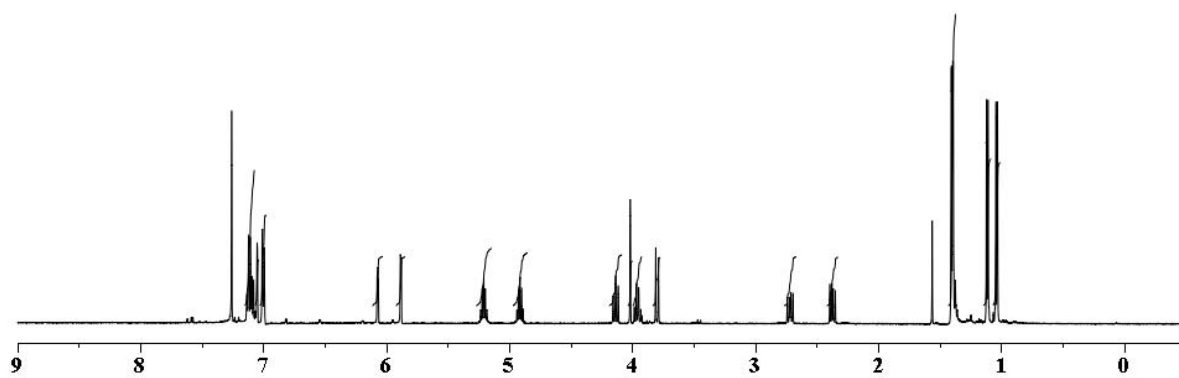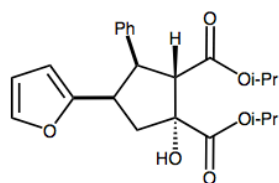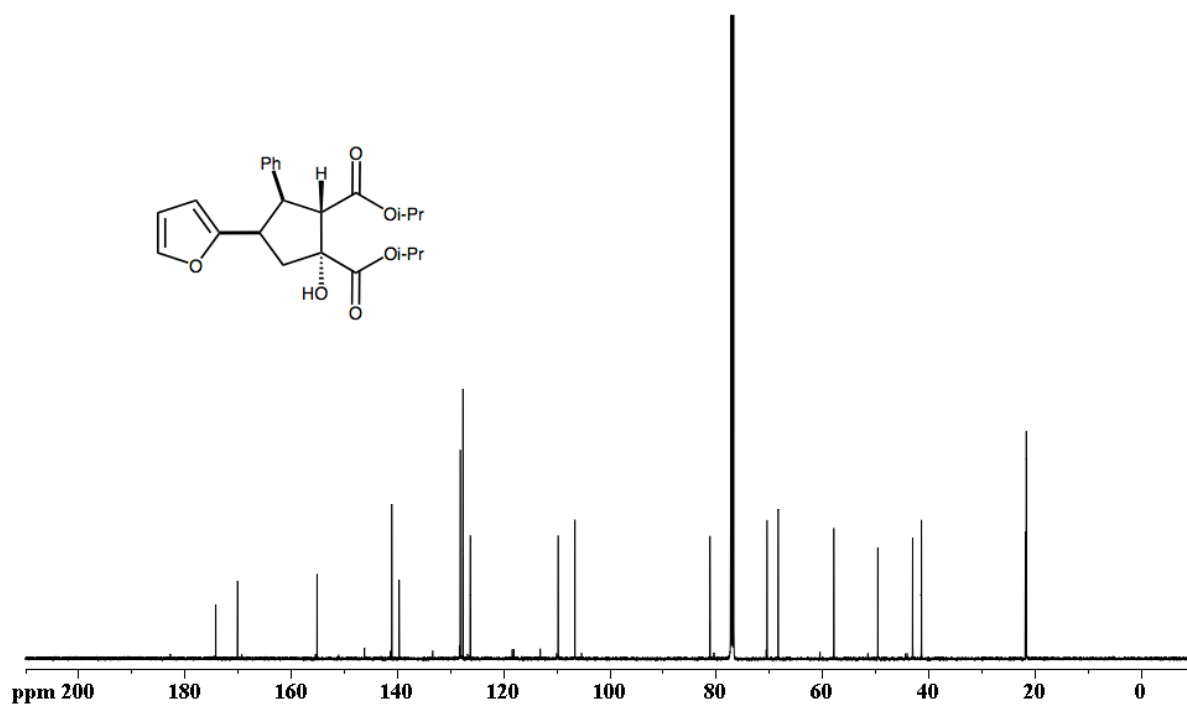

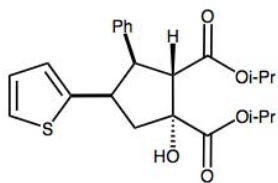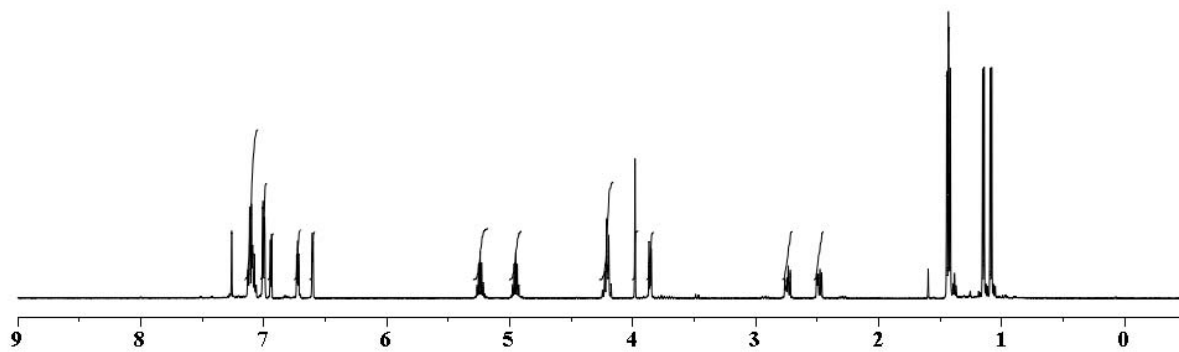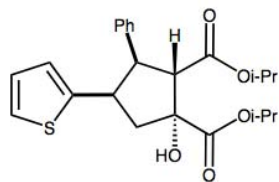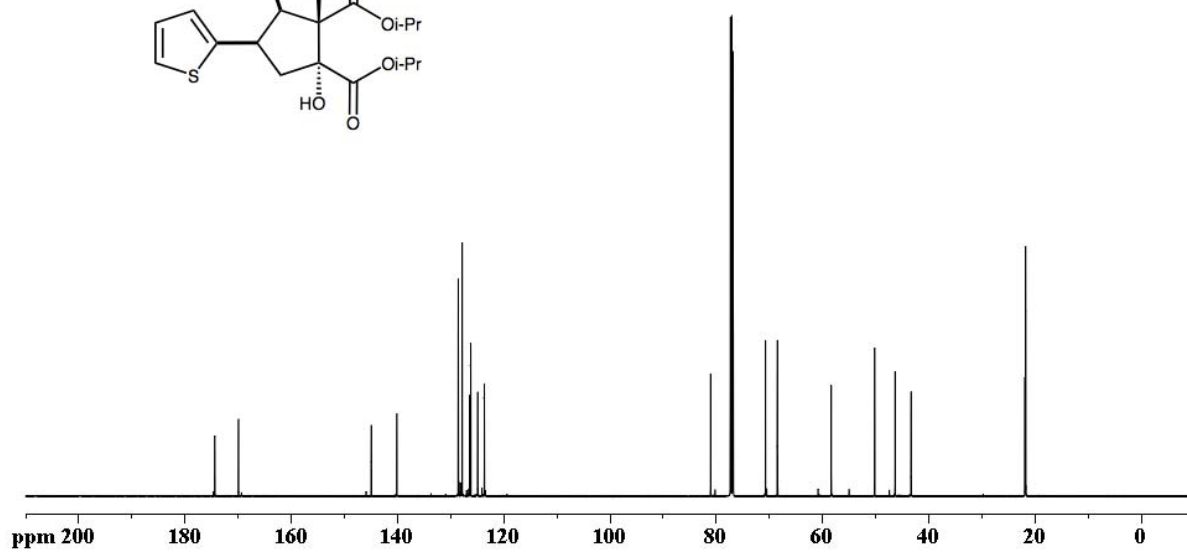

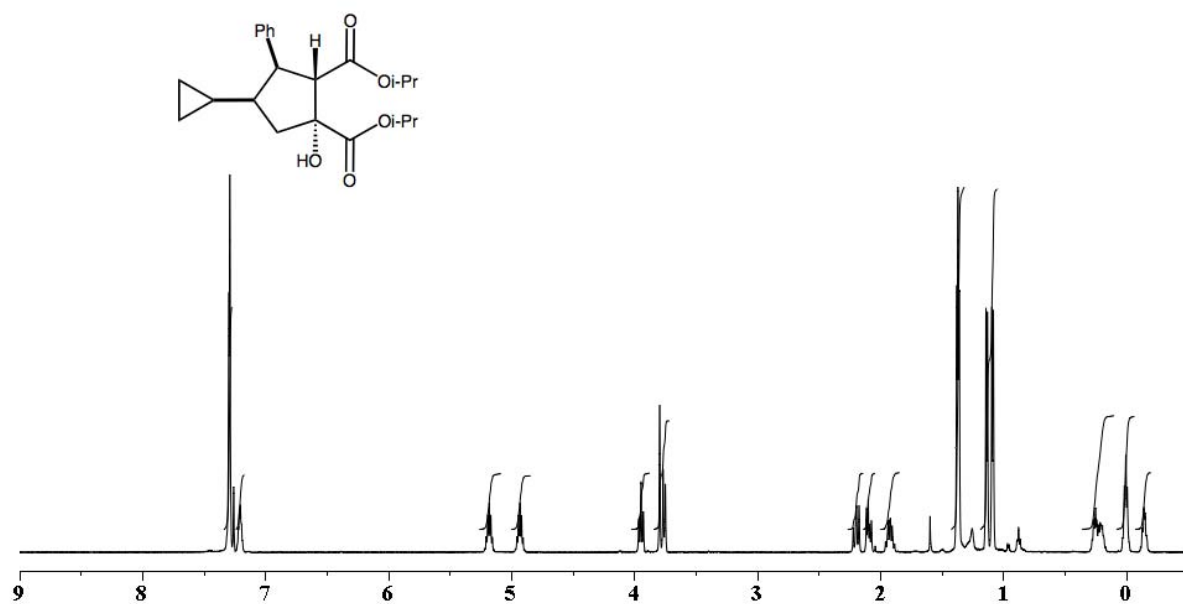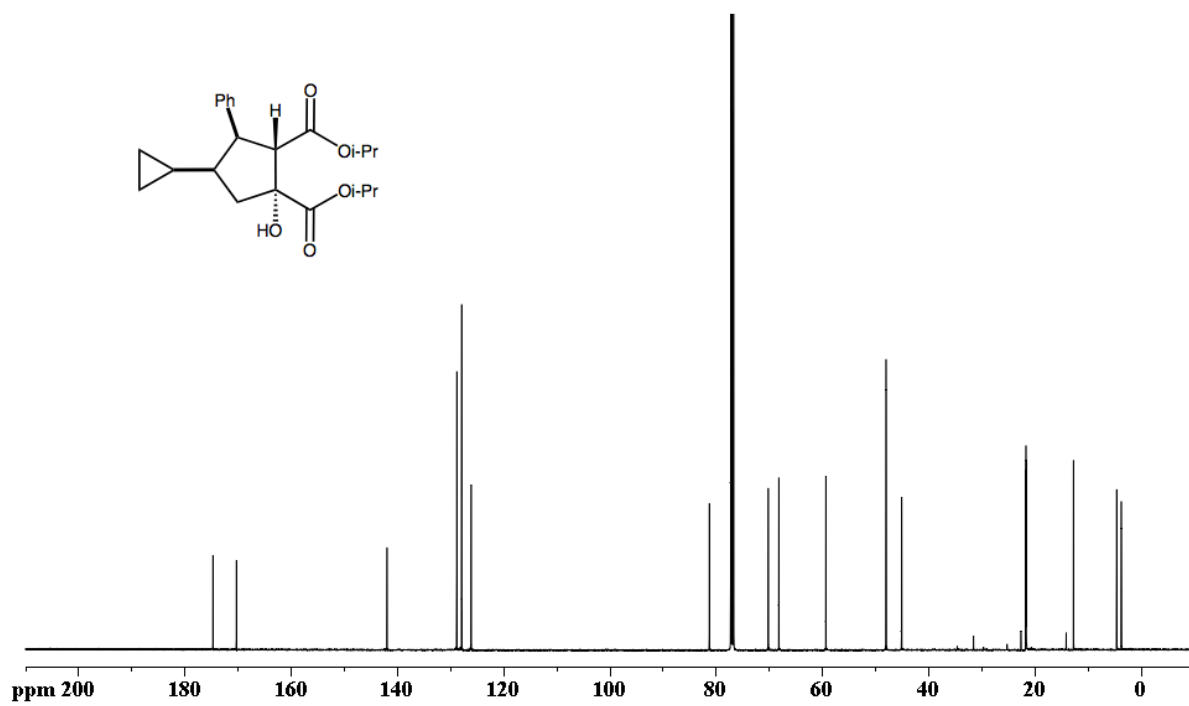

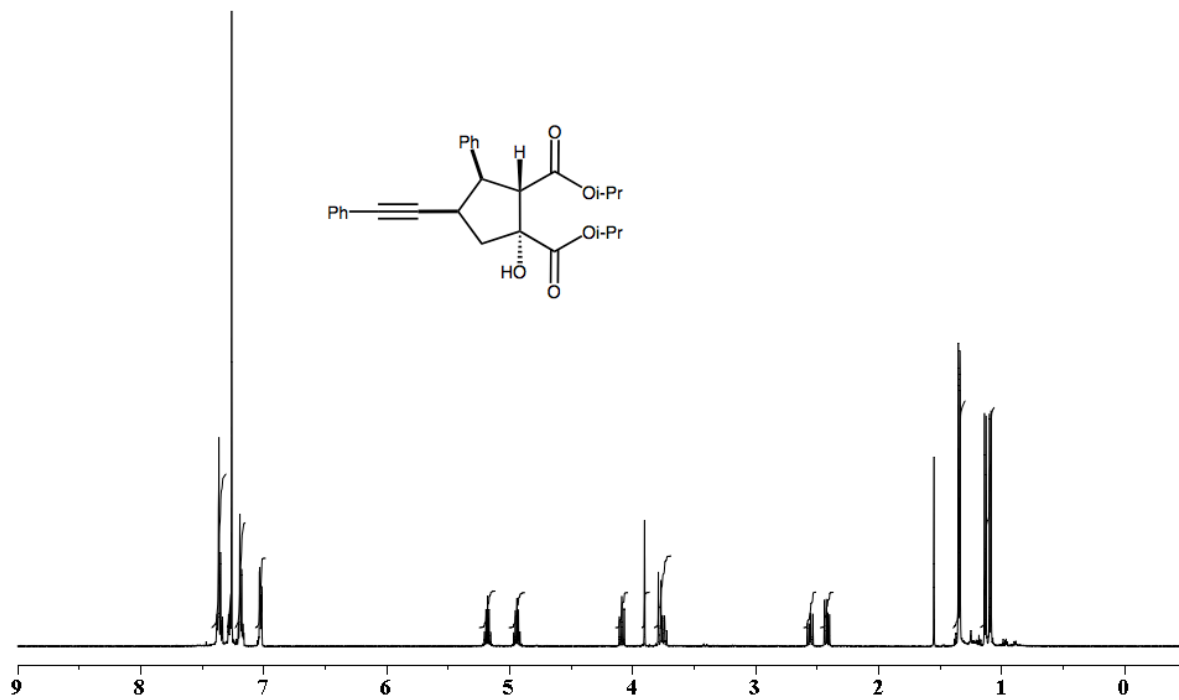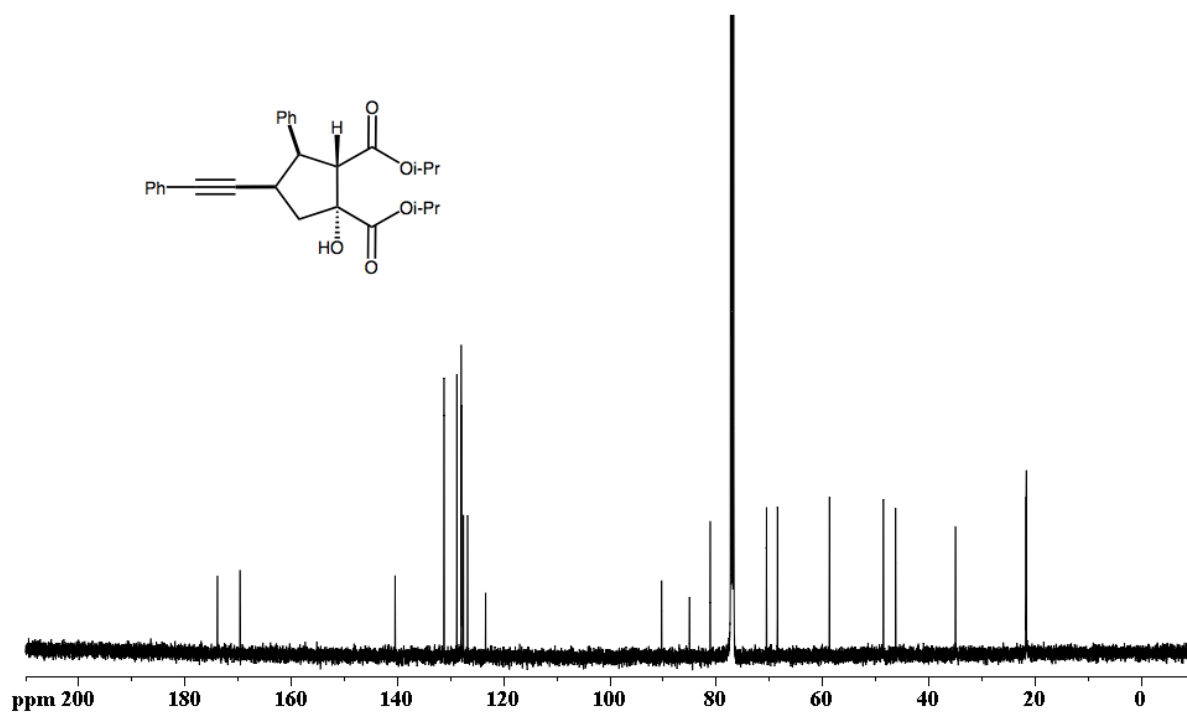

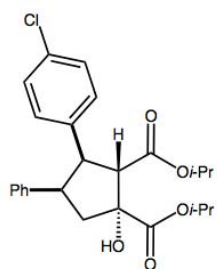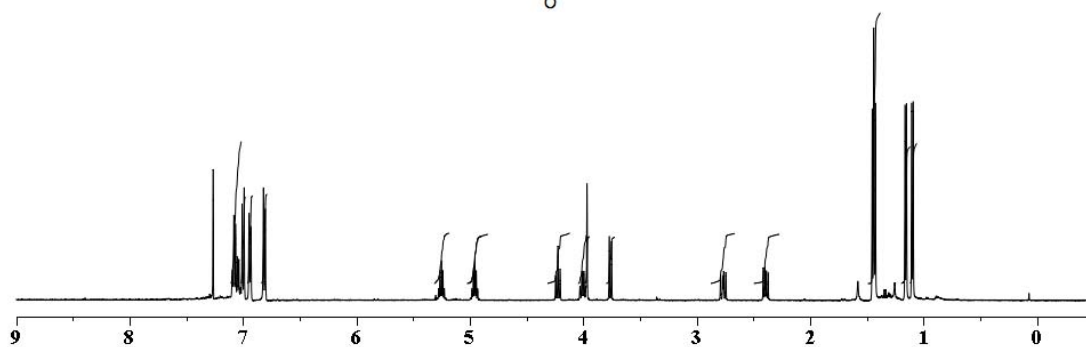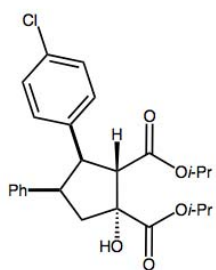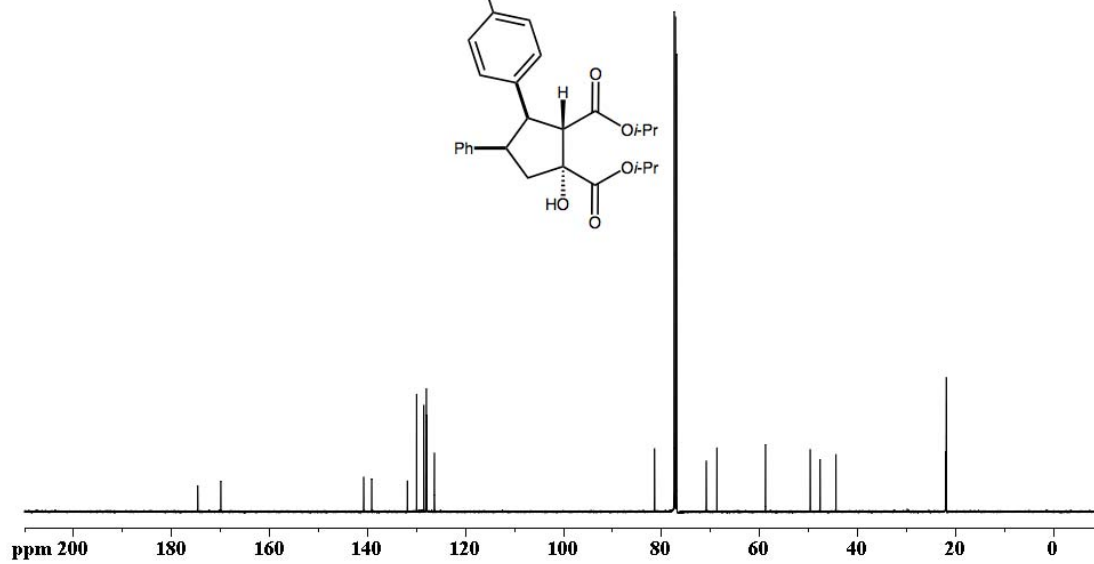

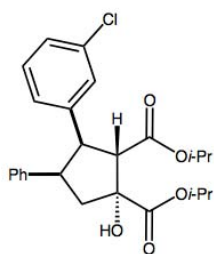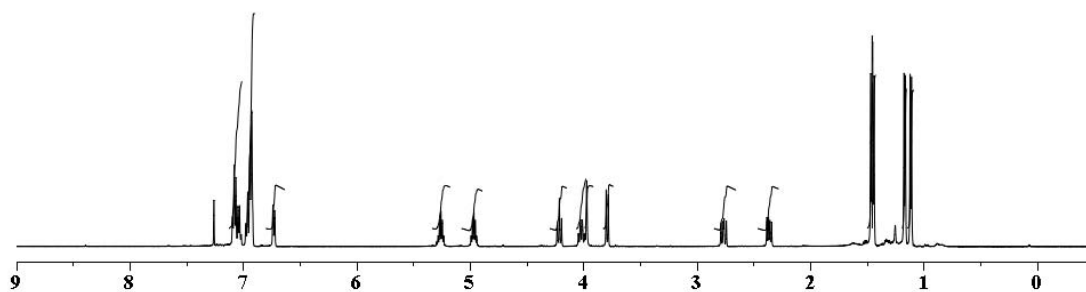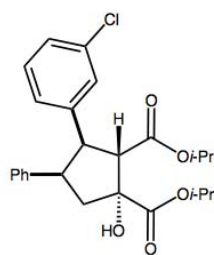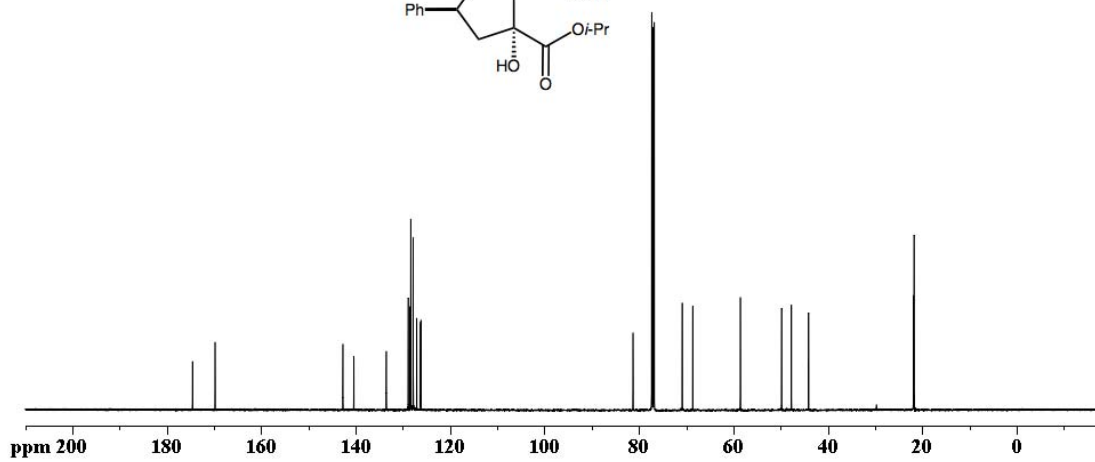



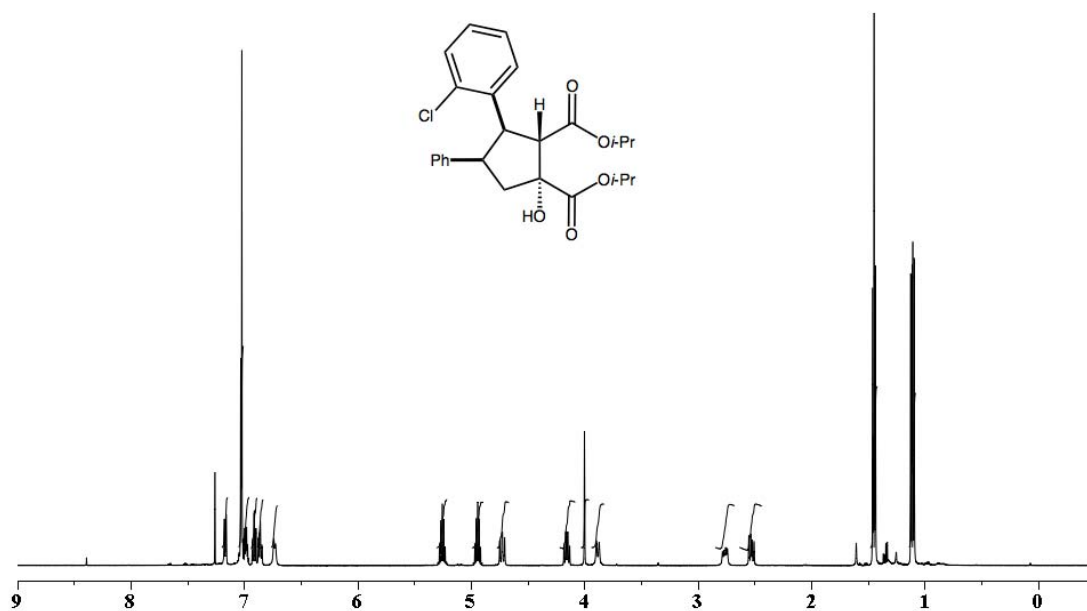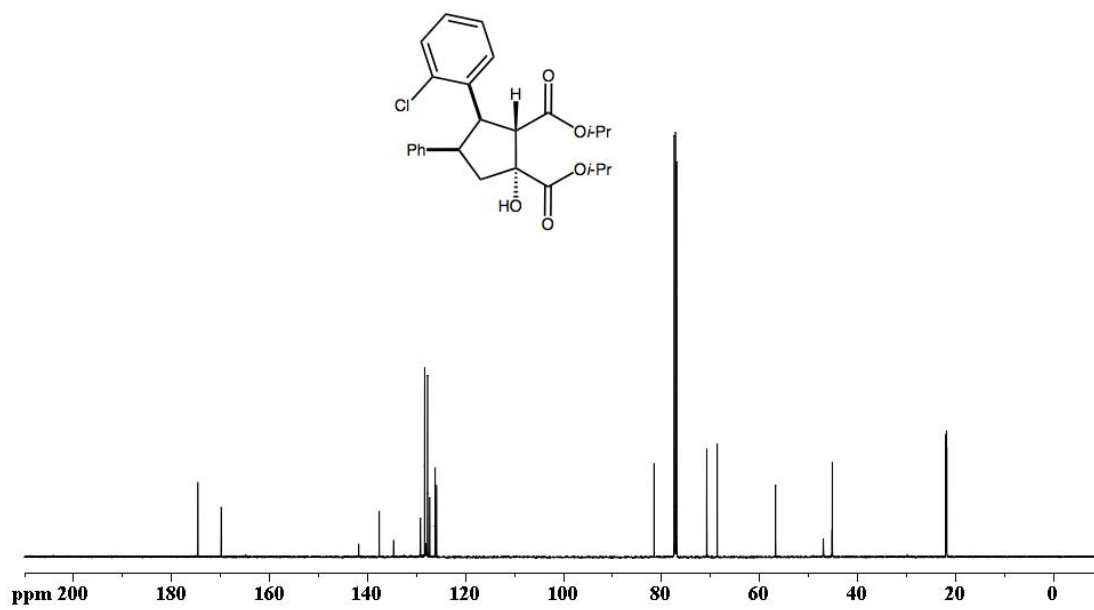

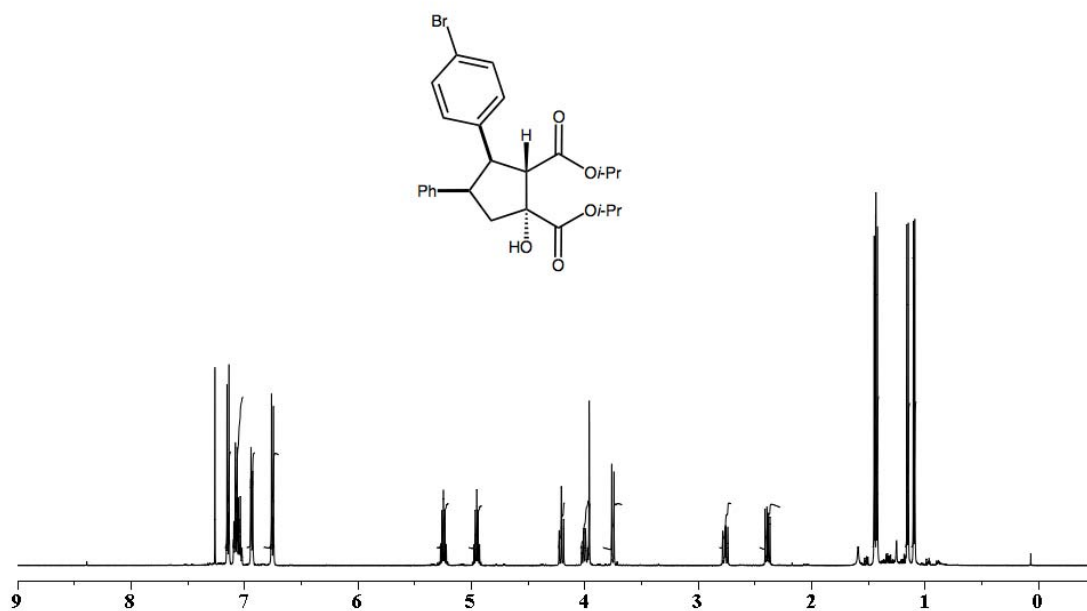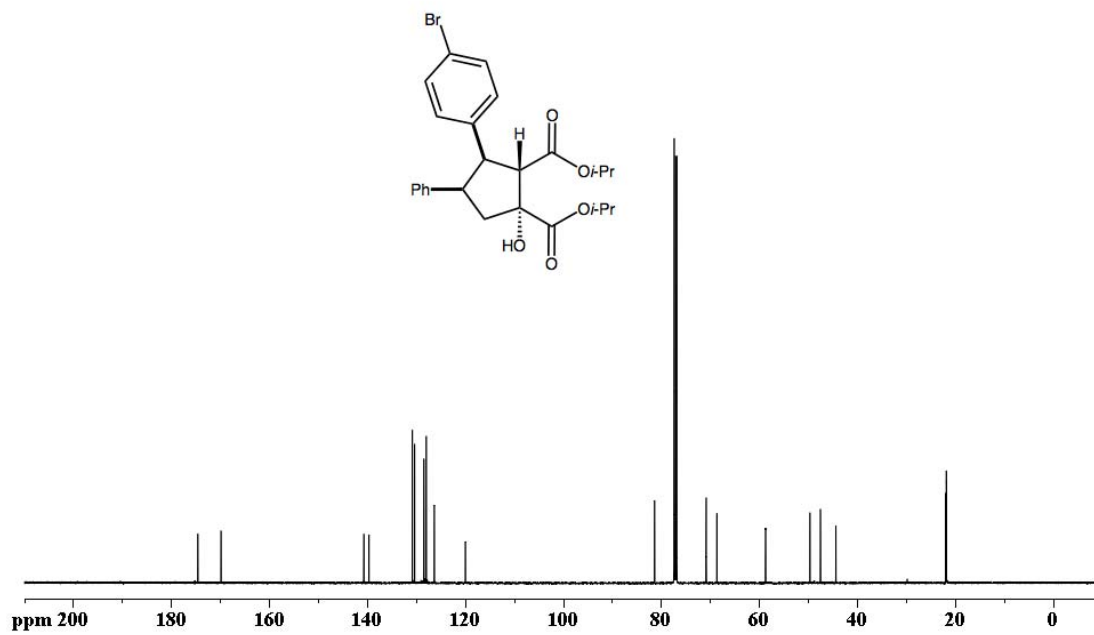

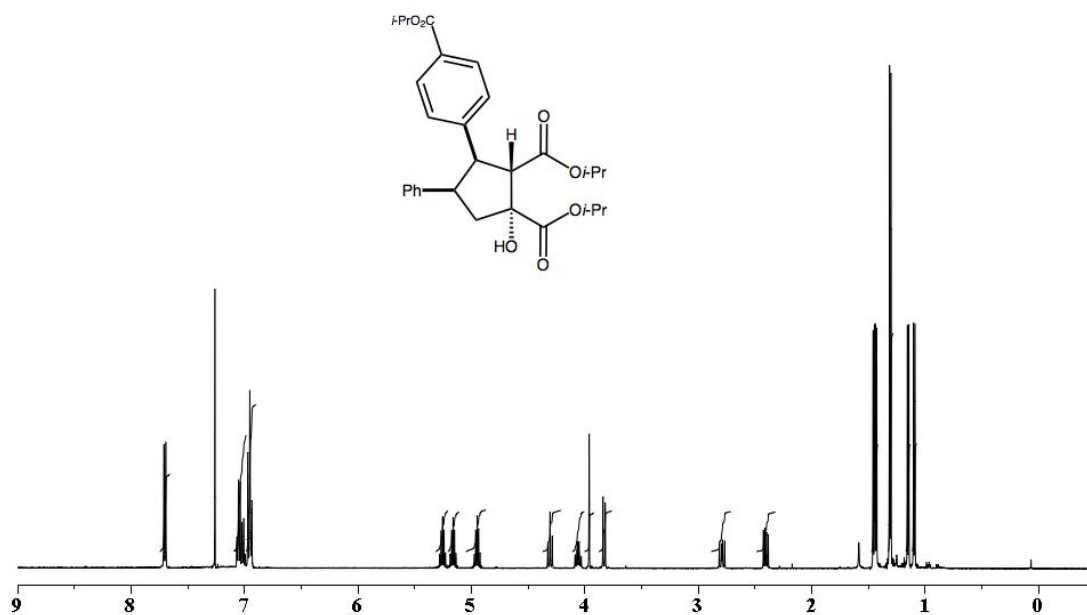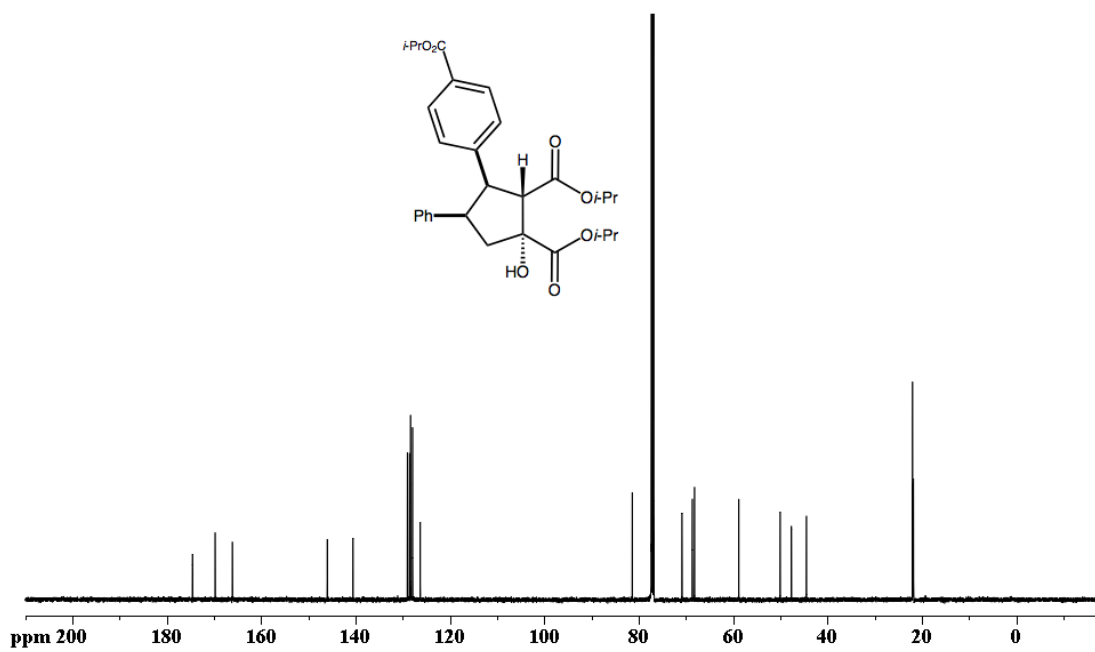

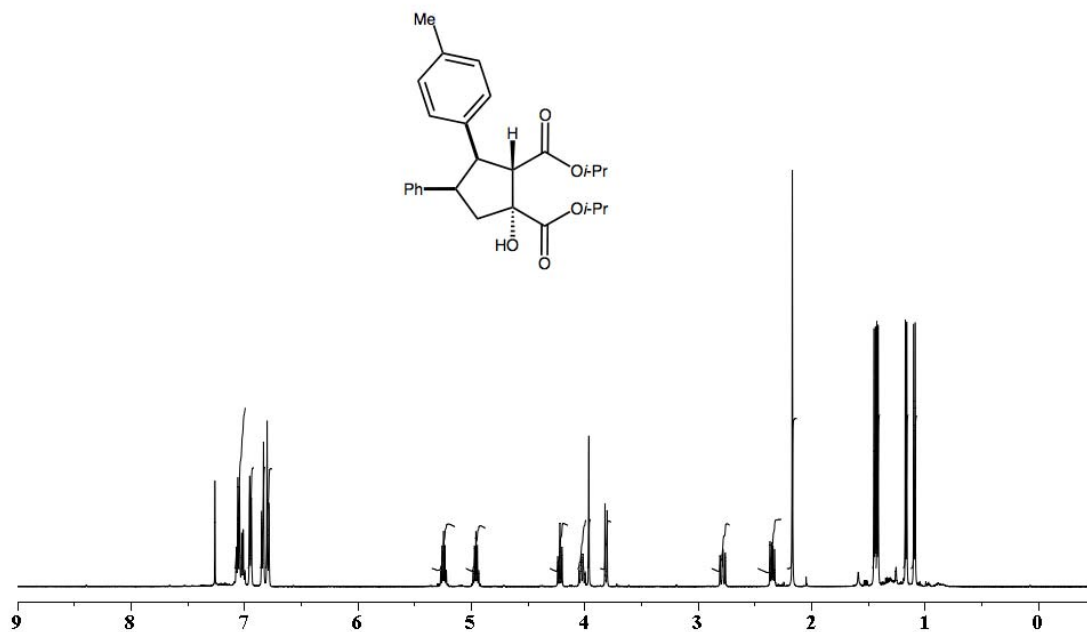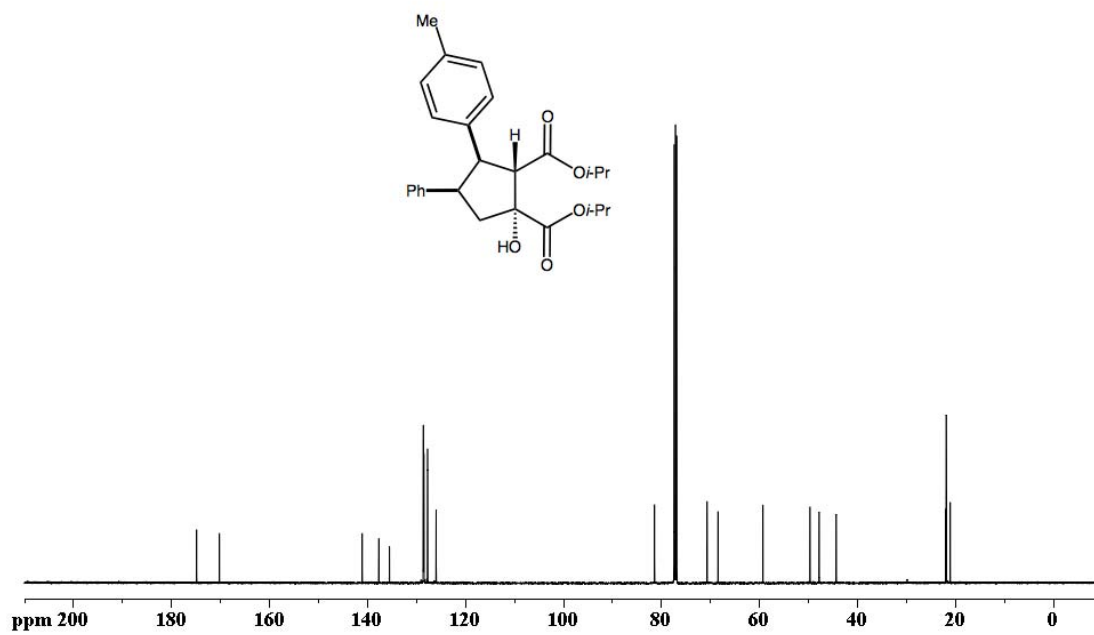

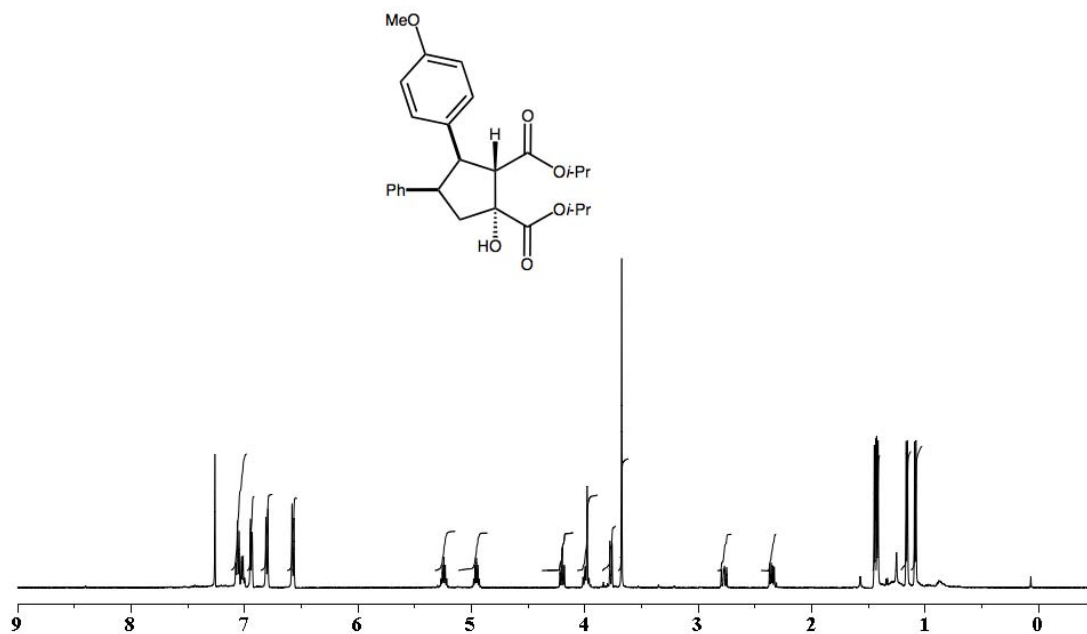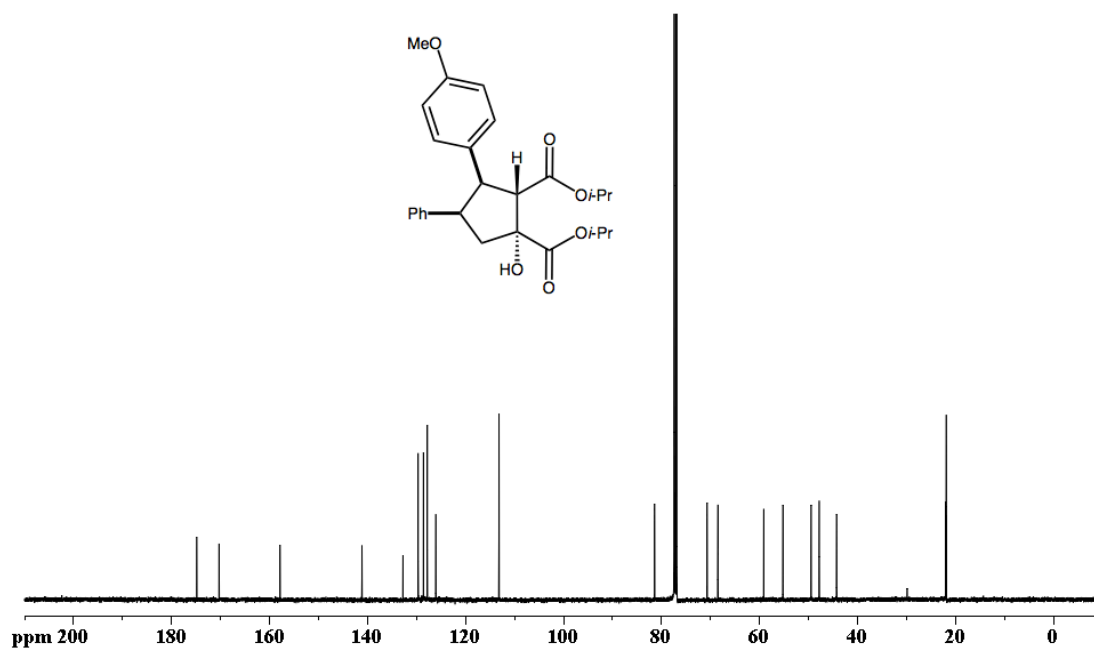

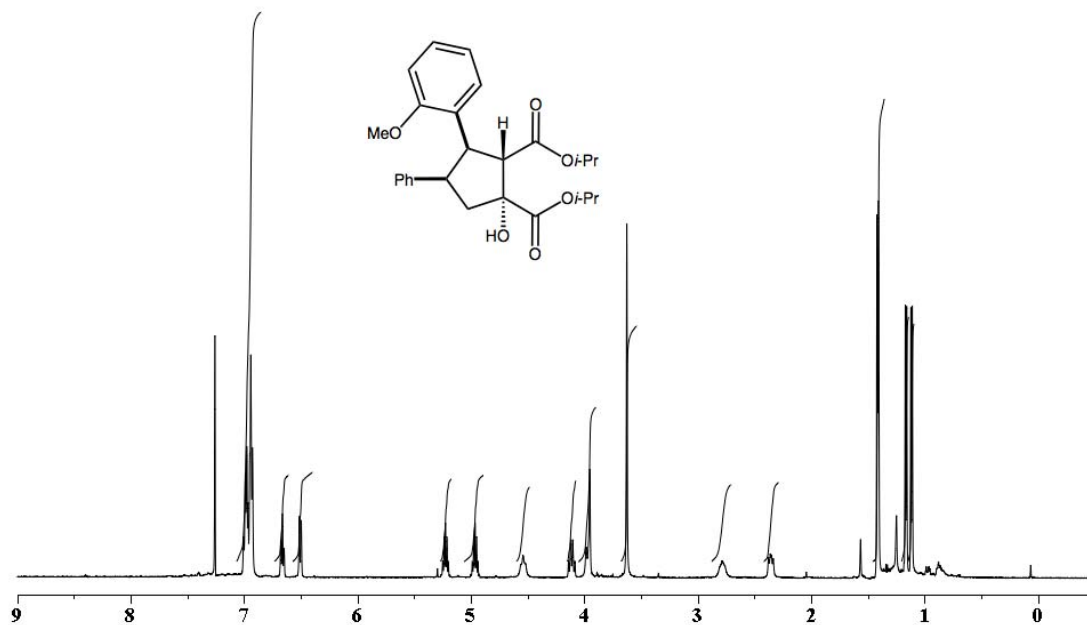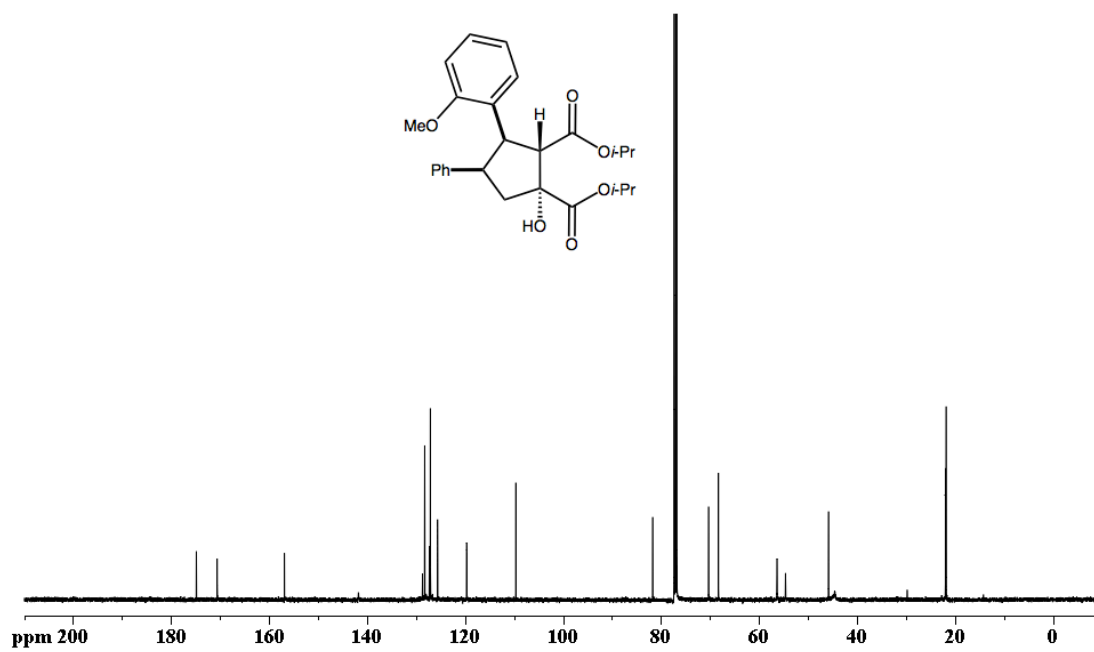

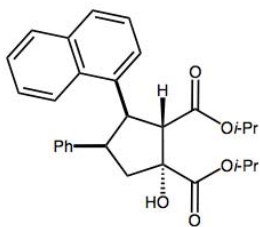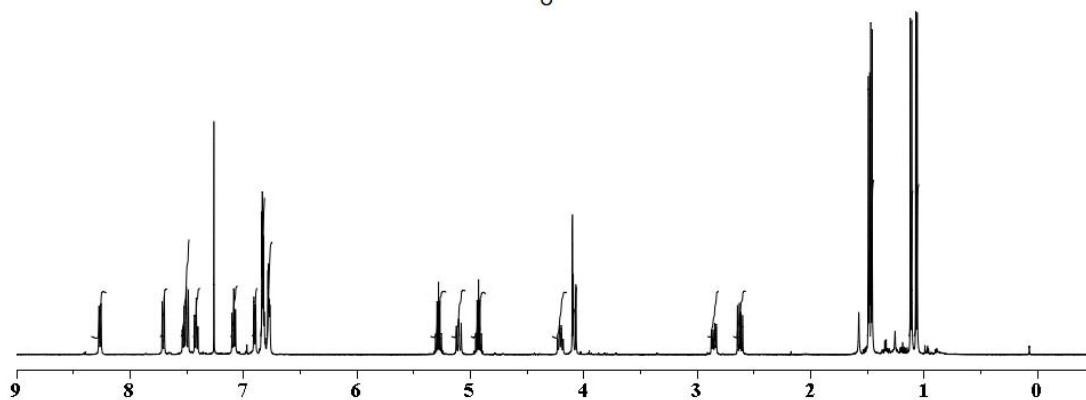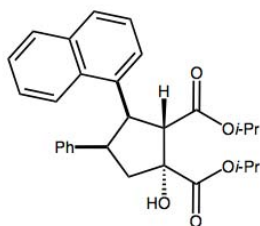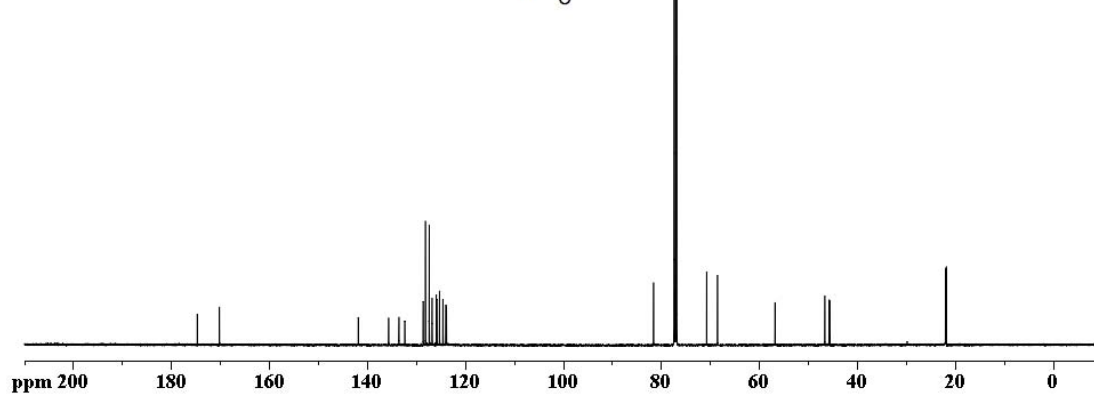

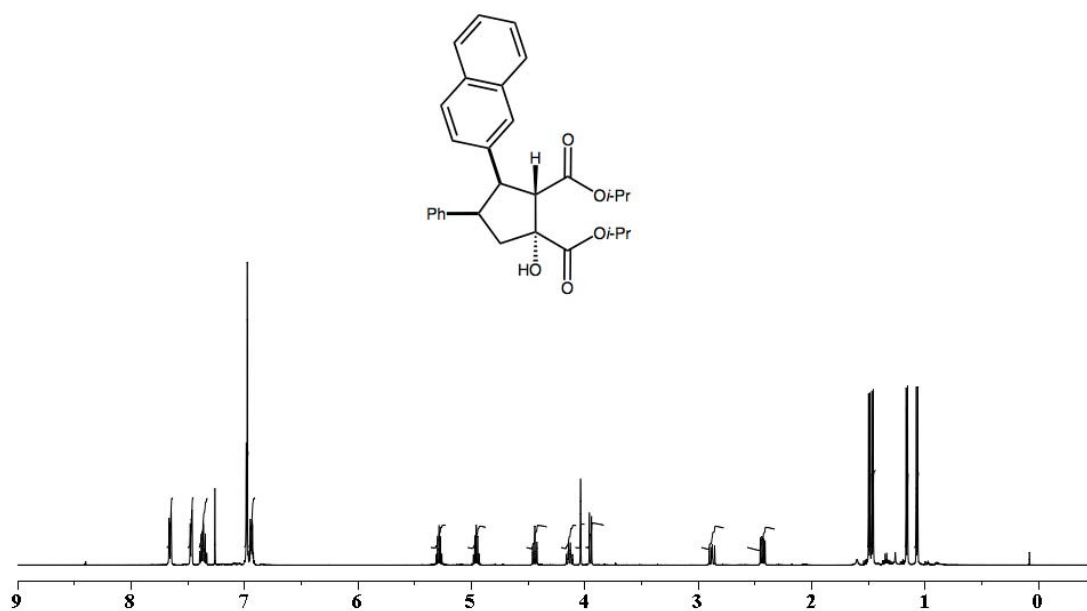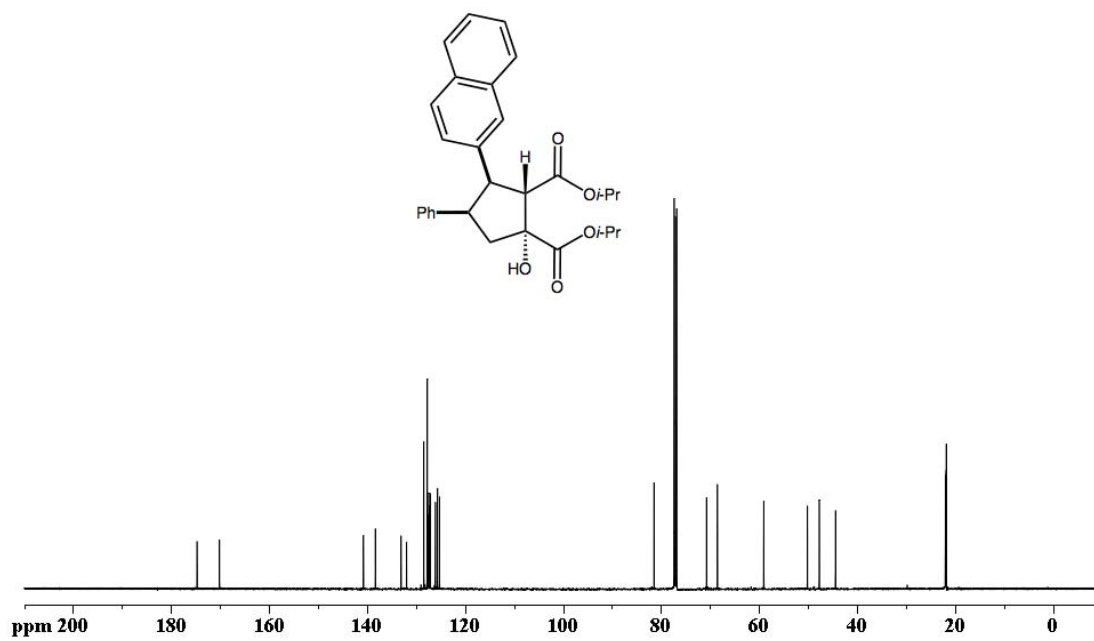



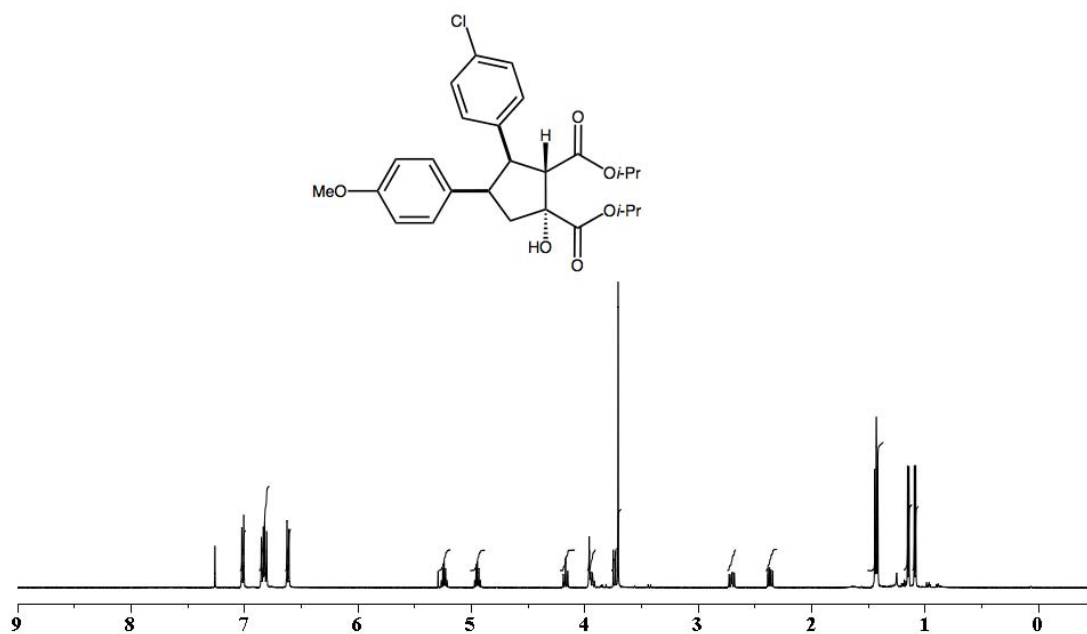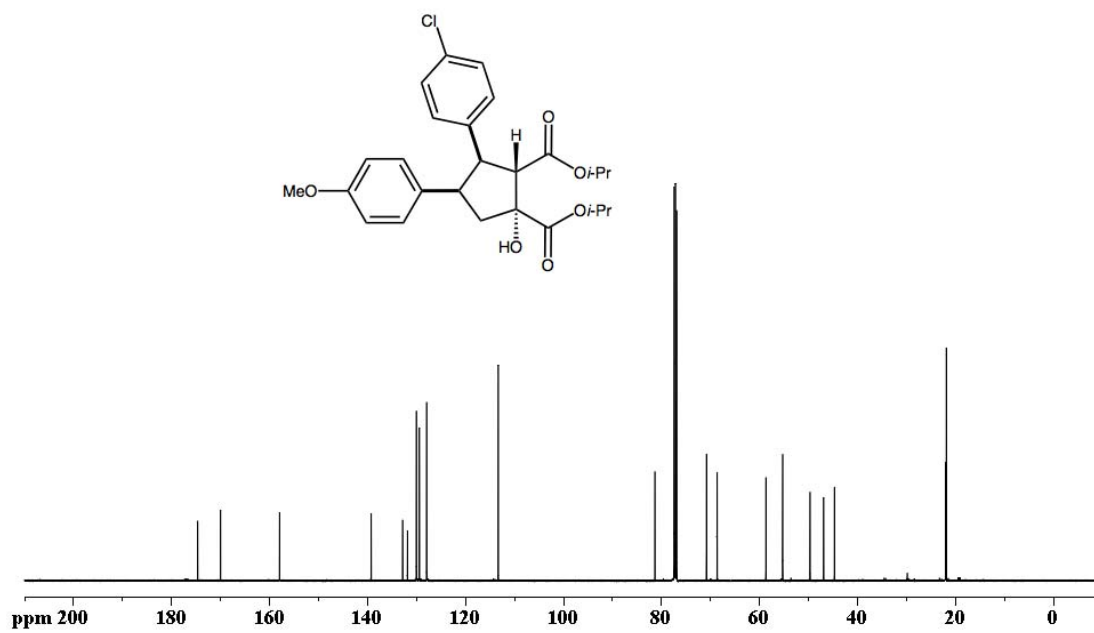

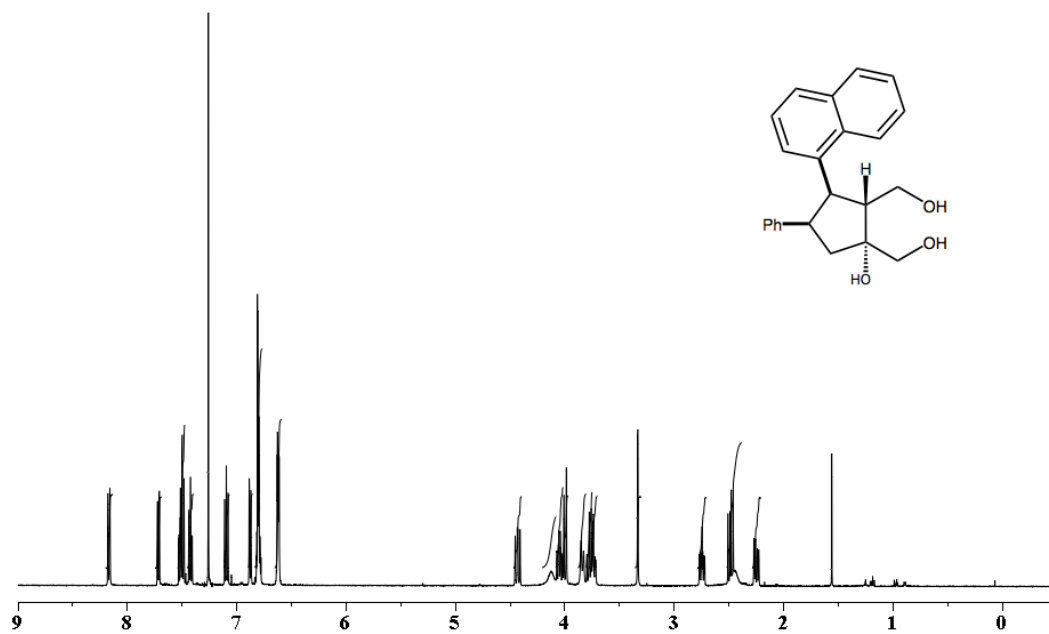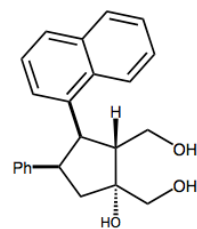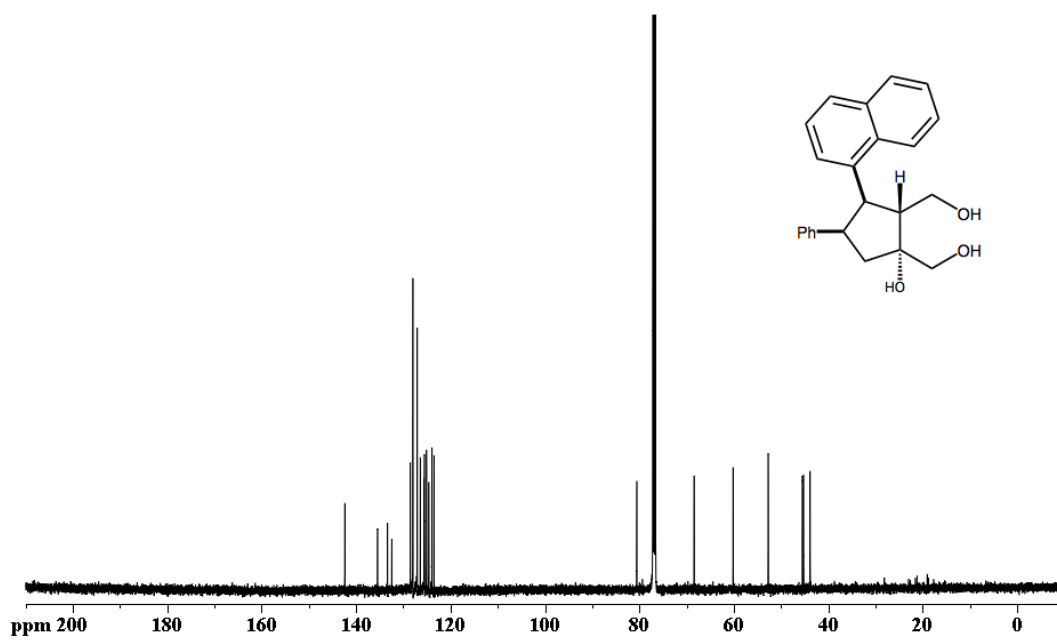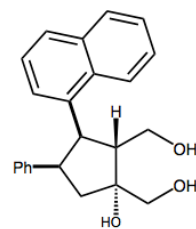

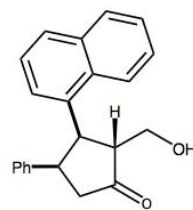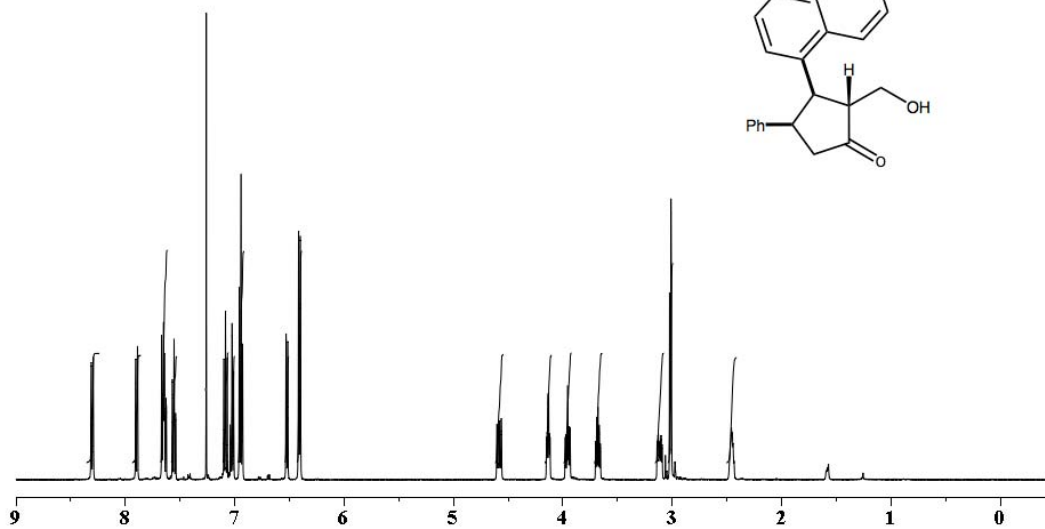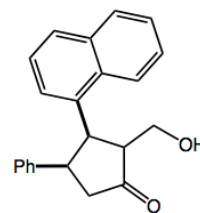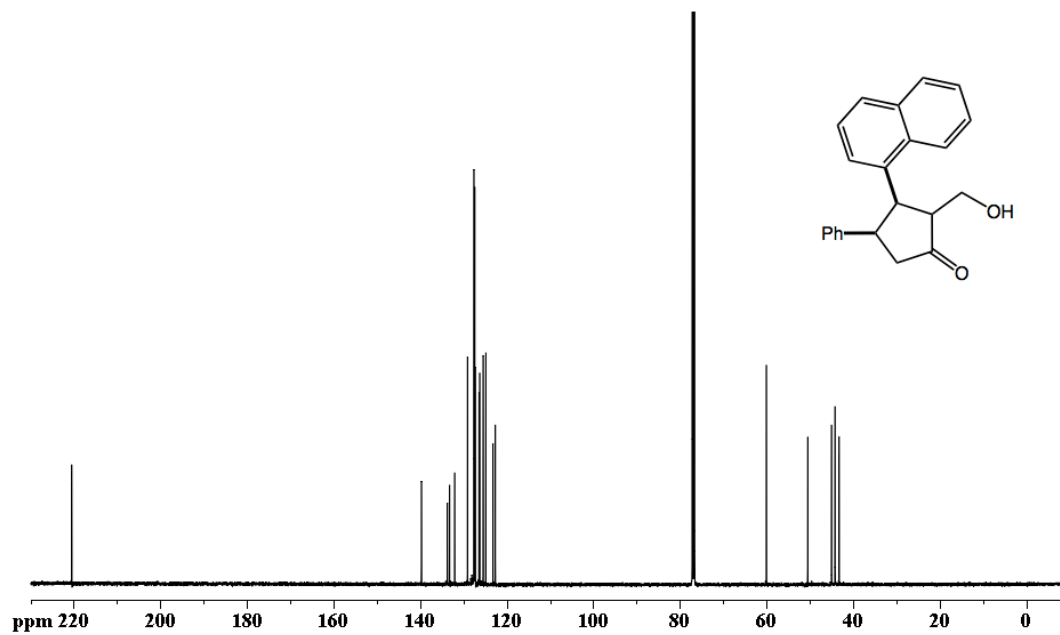

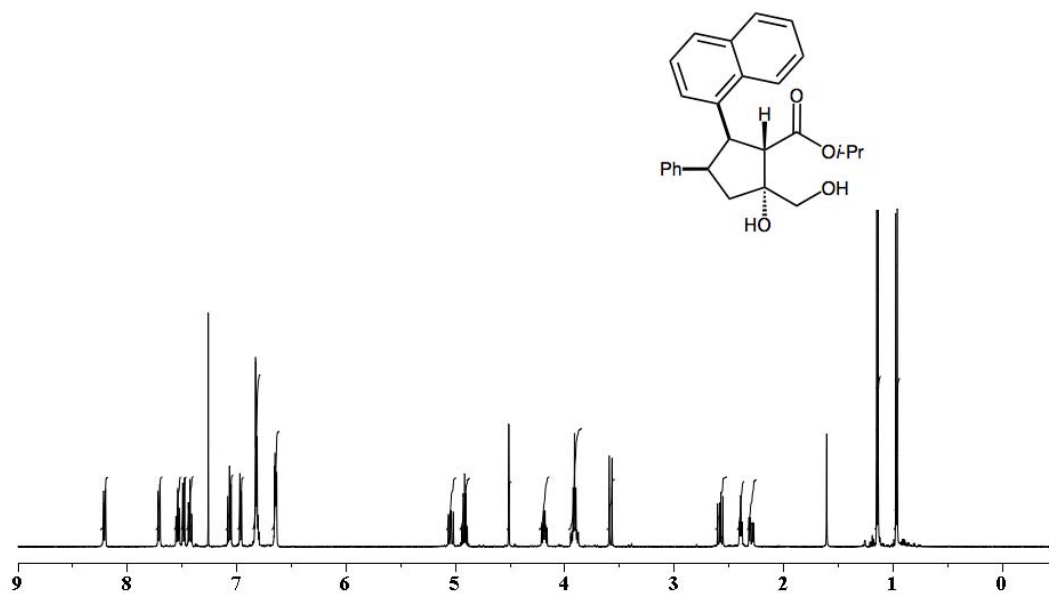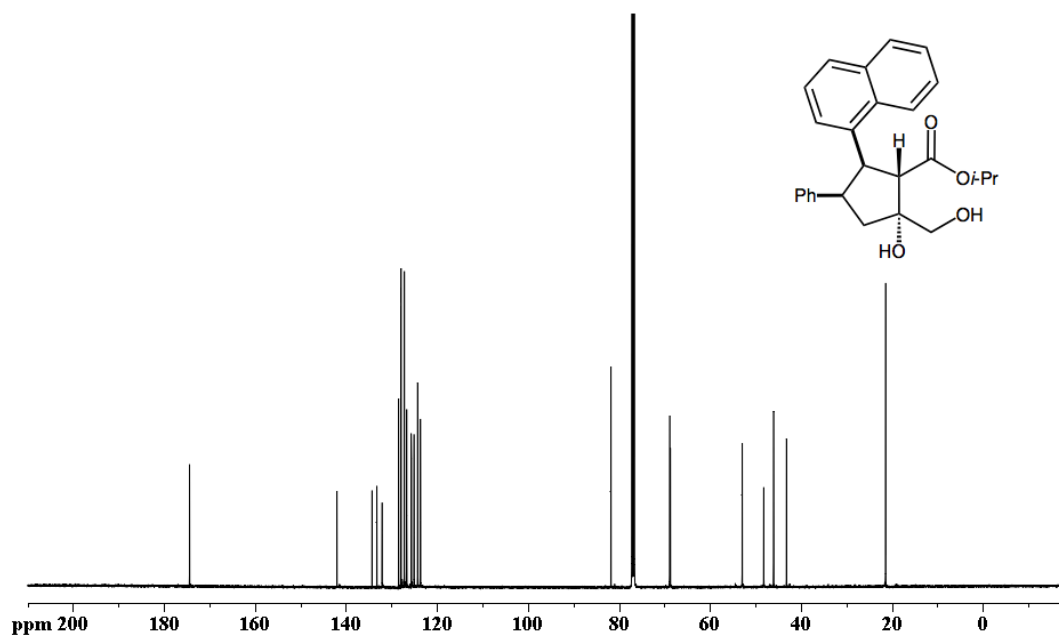

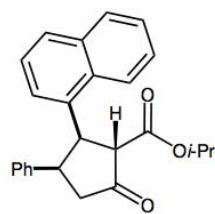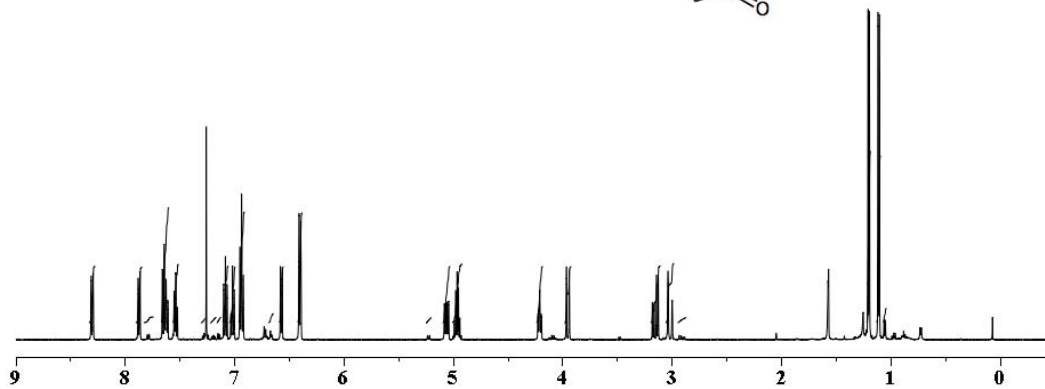

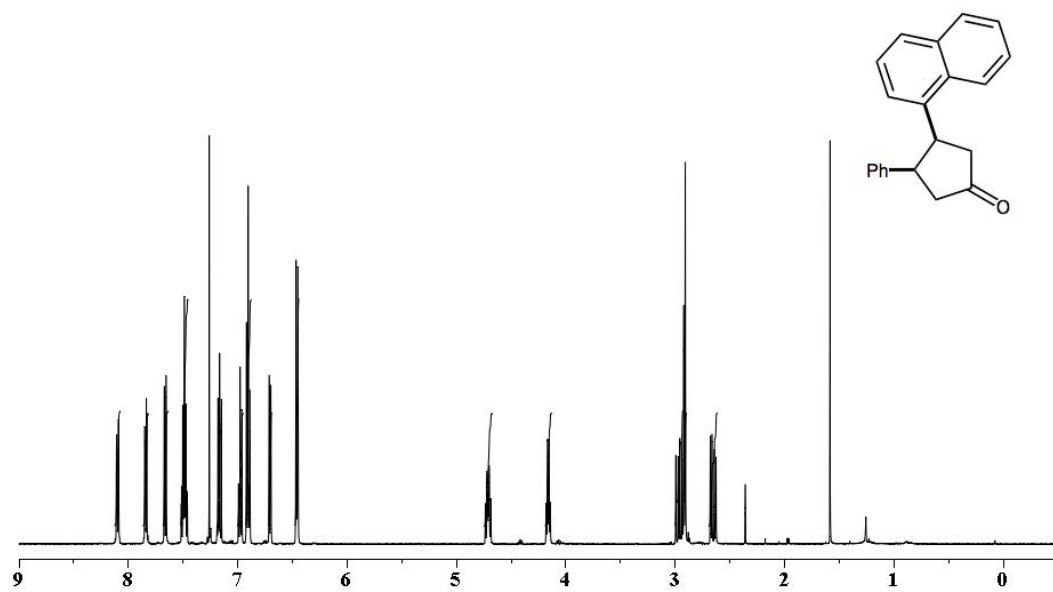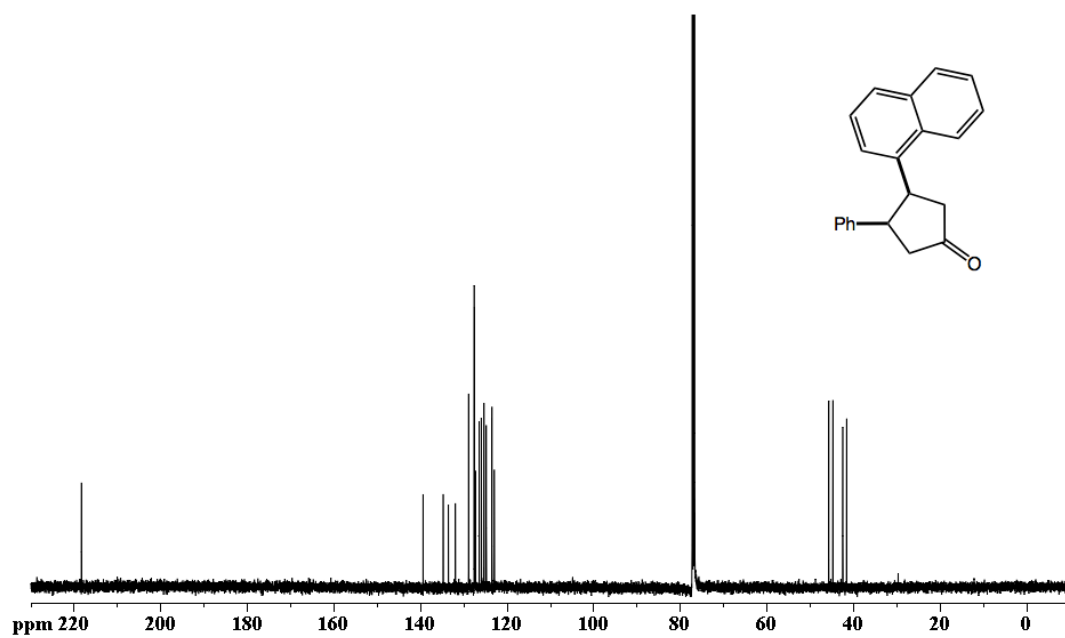

## HPLC Traces of Racemic and Enantioenriched Compounds

## Racemic 3

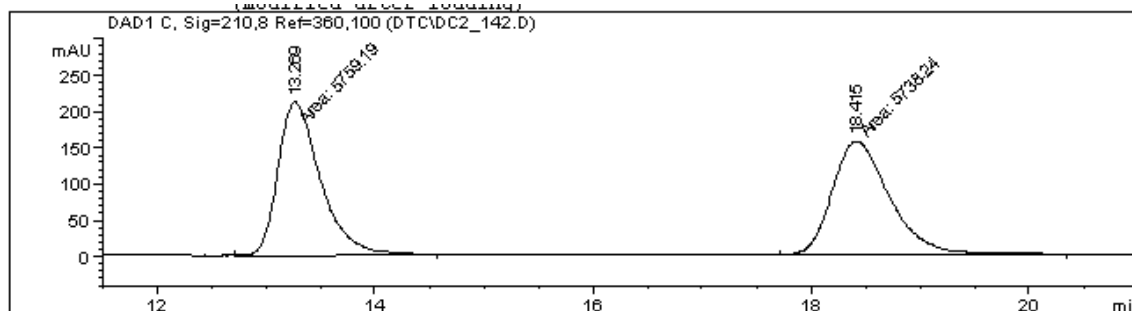

## Area Percent Report

Sorted By : Signal  
 Multiplier : 1.0000  
 Dilution : 1.0000  
 Use Multiplier & Dilution Factor with ISTDs

Signal 1: DAD1 C, Sig=210,8 Ref=360,100

| Peak # | RetTime [min] | Type | Width [min] | Area [mAU*s] | Height [mAU] | Area %  |
|--------|---------------|------|-------------|--------------|--------------|---------|
| 1      | 13.269        | MM   | 0.4531      | 5759.18896   | 211.84776    | 50.0911 |
| 2      | 18.415        | MM   | 0.6111      | 5738.24023   | 156.50308    | 49.9089 |

Totals : 1.14974e4 368.35085

## Enantioenriched 3

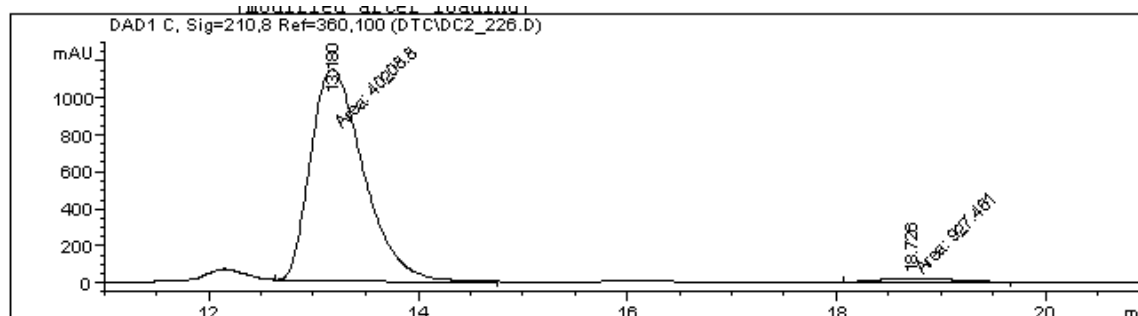

## Area Percent Report

Sorted By : Signal  
 Multiplier : 1.0000  
 Dilution : 1.0000  
 Use Multiplier & Dilution Factor with ISTDs

Signal 1: DAD1 C, Sig=210,8 Ref=360,100

| Peak # | RetTime [min] | Type | Width [min] | Area [mAU*s] | Height [mAU] | Area %  |
|--------|---------------|------|-------------|--------------|--------------|---------|
| 1      | 13.180        | MM   | 0.5858      | 4.02088e4    | 1143.91345   | 97.7454 |
| 2      | 18.726        | MM   | 0.7381      | 927.46082    | 20.94258     | 2.2546  |

Totals : 4.11362e4 1164.85604

**Racemic 4**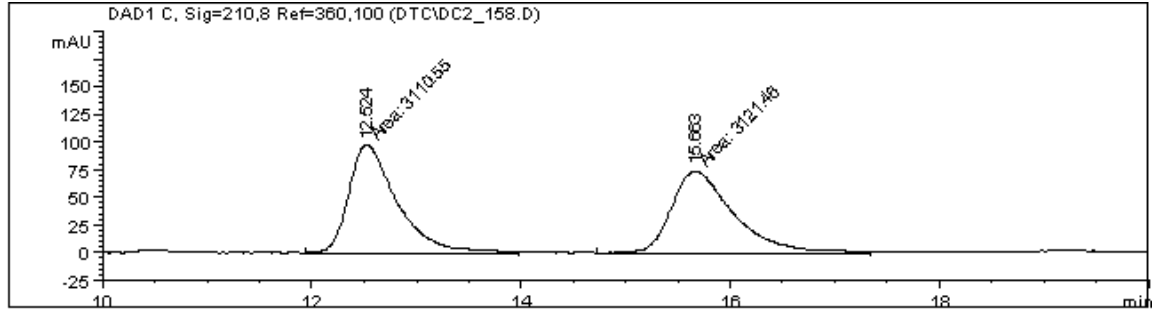

```

=====
                          Area Percent Report
=====
  
```

```

Sorted By      :      Signal
Multiplier     :      1.0000
Dilution      :      1.0000
Use Multiplier & Dilution Factor with ISTDs
  
```

Signal 1: DAD1 C, Sig=210,8 Ref=360,100

| Peak # | RetTime [min] | Type | Width [min] | Area [mAU*s] | Height [mAU] | Area %  |
|--------|---------------|------|-------------|--------------|--------------|---------|
| 1      | 12.524        | MM   | 0.5313      | 3110.54614   | 97.58183     | 49.9124 |
| 2      | 15.663        | MM   | 0.6944      | 3121.45898   | 74.92123     | 50.0876 |

Totals :                    6232.00513   172.50305

**Enantioenriched 4**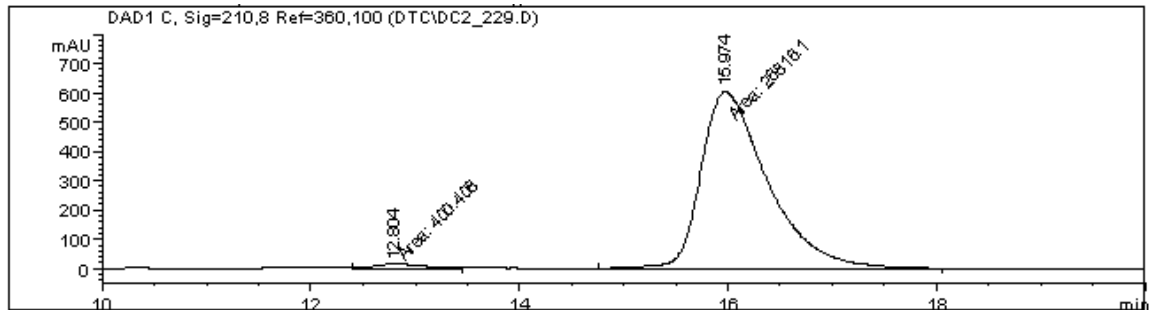

```

=====
                          Area Percent Report
=====
  
```

```

Sorted By      :      Signal
Multiplier     :      1.0000
Dilution      :      1.0000
Use Multiplier & Dilution Factor with ISTDs
  
```

Signal 1: DAD1 C, Sig=210,8 Ref=360,100

| Peak # | RetTime [min] | Type | Width [min] | Area [mAU*s] | Height [mAU] | Area %  |
|--------|---------------|------|-------------|--------------|--------------|---------|
| 1      | 12.804        | MM   | 0.5229      | 400.40820    | 12.76304     | 1.4712  |
| 2      | 15.974        | MM   | 0.7397      | 2.68161e4    | 604.21637    | 98.5288 |

Totals :                    2.72165e4   616.97941



**Racemic 5**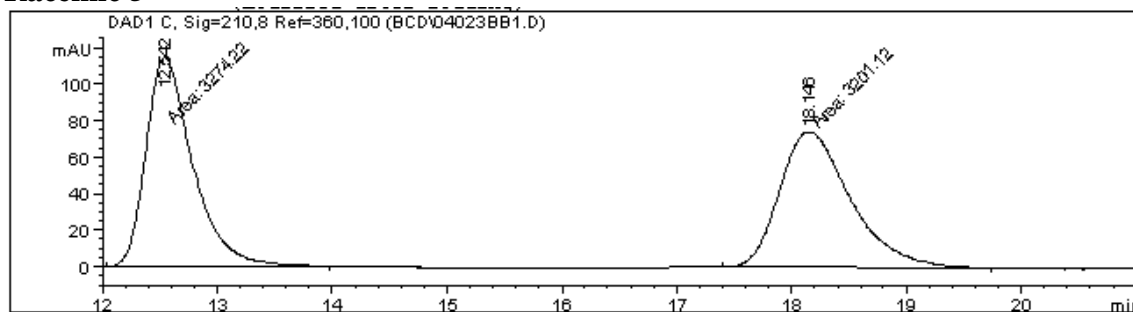

```

=====
                          Area Percent Report
=====
  
```

```

Sorted By      :      Signal
Multiplier     :      1.0000
Dilution      :      1.0000
Use Multiplier & Dilution Factor with ISTDs
  
```

Signal 1: DAD1 C, Sig=210,8 Ref=360,100

| Peak # | RetTime [min] | Type | Width [min] | Area [mAU*s] | Height [mAU] | Area %  |
|--------|---------------|------|-------------|--------------|--------------|---------|
| 1      | 12.542        | MM   | 0.4760      | 3274.21533   | 114.65311    | 50.5644 |
| 2      | 18.146        | MM   | 0.7178      | 3201.12476   | 74.32366     | 49.4356 |

Totals :                    6475.34009   188.97677

**Enantioenriched 5**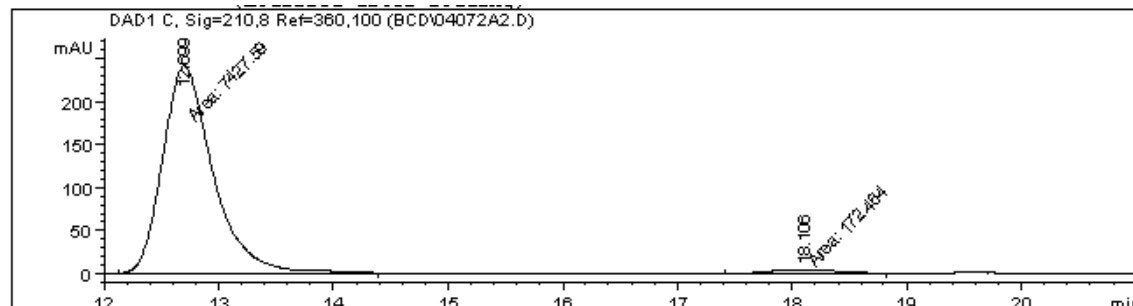

```

=====
                          Area Percent Report
=====
  
```

```

Sorted By      :      Signal
Multiplier     :      1.0000
Dilution      :      1.0000
Use Multiplier & Dilution Factor with ISTDs
  
```

Signal 1: DAD1 C, Sig=210,8 Ref=360,100

| Peak # | RetTime [min] | Type | Width [min] | Area [mAU*s] | Height [mAU] | Area %  |
|--------|---------------|------|-------------|--------------|--------------|---------|
| 1      | 12.699        | MM   | 0.5127      | 7427.59375   | 241.47023    | 97.7308 |
| 2      | 18.106        | MM   | 0.6762      | 172.46419    | 4.25109      | 2.2692  |

Totals :                    7600.05794   245.72132

**Racemic 6**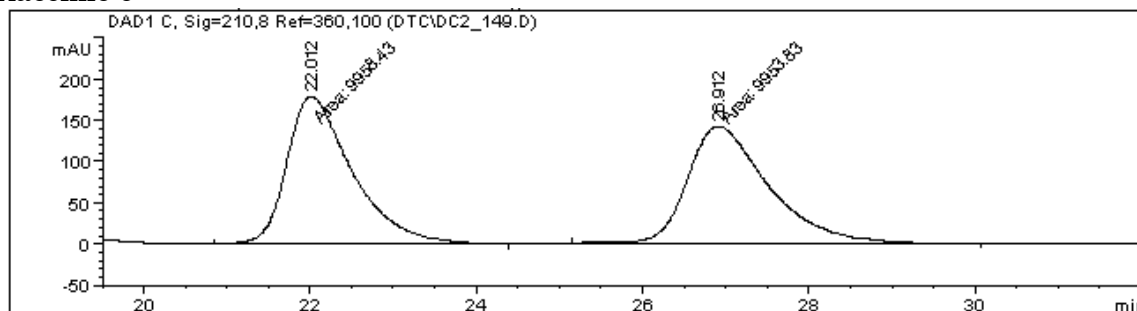

```

=====
                          Area Percent Report
=====
  
```

```

Sorted By      :      Signal
Multiplier     :      1.0000
Dilution      :      1.0000
Use Multiplier & Dilution Factor with ISTDs
  
```

Signal 1: DAD1 C, Sig=210,8 Ref=360,100

| Peak # | RetTime [min] | Type | Width [min] | Area [mAU*s] | Height [mAU] | Area %  |
|--------|---------------|------|-------------|--------------|--------------|---------|
| 1      | 22.012        | MM   | 0.9231      | 9958.43164   | 179.80490    | 50.0116 |
| 2      | 26.912        | MM   | 1.1619      | 9953.83008   | 142.78087    | 49.9884 |

Totals :                    1.99123e4    322.58577

**Enatioenriched 6**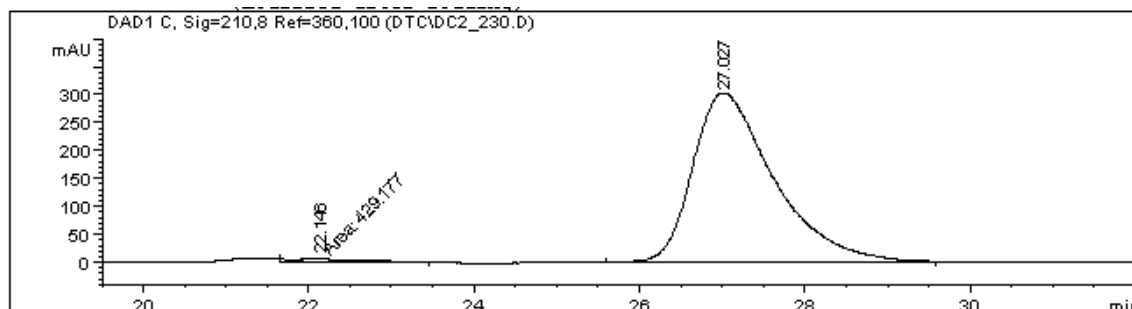

```

=====
                          Area Percent Report
=====
  
```

```

Sorted By      :      Signal
Multiplier     :      1.0000
Dilution      :      1.0000
Use Multiplier & Dilution Factor with ISTDs
  
```

Signal 1: DAD1 C, Sig=210,8 Ref=360,100

| Peak # | RetTime [min] | Type | Width [min] | Area [mAU*s] | Height [mAU] | Area %  |
|--------|---------------|------|-------------|--------------|--------------|---------|
| 1      | 22.146        | MM   | 1.0649      | 429.17670    | 6.71727      | 2.0309  |
| 2      | 27.027        | VB   | 0.8261      | 2.07031e4    | 302.64142    | 97.9691 |

Totals :                    2.11322e4    309.35869

**Racemic 7**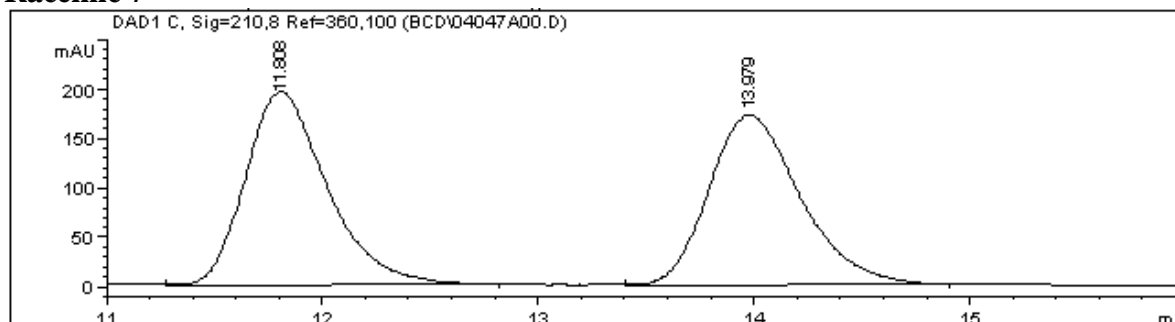

```

=====
                          Area Percent Report
=====
  
```

```

Sorted By      :      Signal
Multiplier     :      1.0000
Dilution      :      1.0000
Use Multiplier & Dilution Factor with ISTDs
  
```

Signal 1: DAD1 C, Sig=210,8 Ref=360,100

| Peak # | RetTime [min] | Type | Width [min] | Area [mAU*s] | Height [mAU] | Area %  |
|--------|---------------|------|-------------|--------------|--------------|---------|
| 1      | 11.808        | VB   | 0.3993      | 5186.56104   | 195.62614    | 50.4879 |
| 2      | 13.979        | BB   | 0.4529      | 5086.31543   | 172.05933    | 49.5121 |

Totals : 1.02729e4 367.68547

**Enantioenriched 7**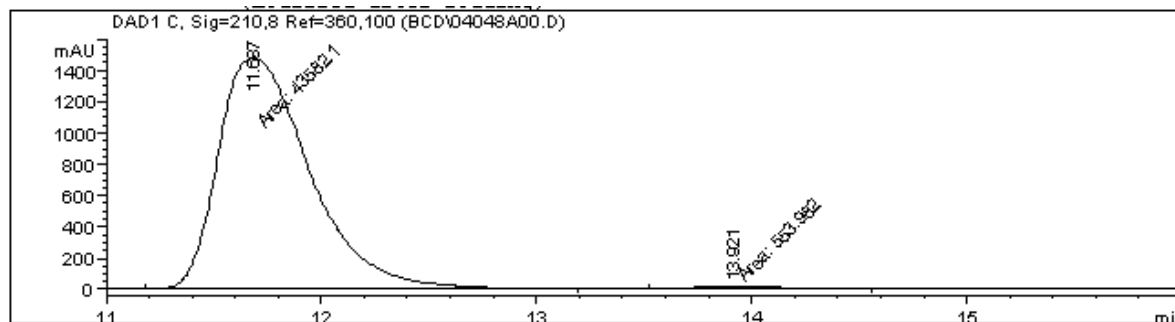

```

=====
                          Area Percent Report
=====
  
```

```

Sorted By      :      Signal
Multiplier     :      1.0000
Dilution      :      1.0000
Use Multiplier & Dilution Factor with ISTDs
  
```

Signal 1: DAD1 C, Sig=210,8 Ref=360,100

| Peak # | RetTime [min] | Type | Width [min] | Area [mAU*s] | Height [mAU] | Area %  |
|--------|---------------|------|-------------|--------------|--------------|---------|
| 1      | 11.687        | MM   | 0.4910      | 4.35821e4    | 1479.45947   | 98.7448 |
| 2      | 13.921        | MM   | 0.4726      | 553.98181    | 19.53677     | 1.2552  |

Totals : 4.41360e4 1498.99624

**Racemic 8**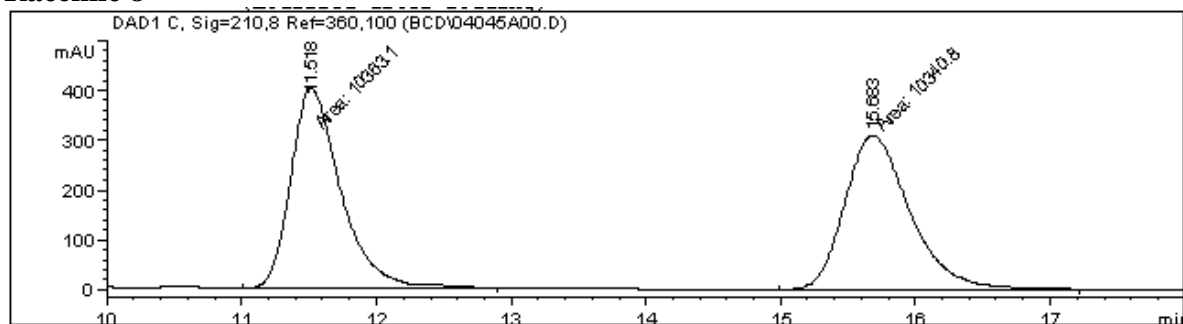=====  
Area Percent Report  
=====

Sorted By : Signal  
Multiplier : 1.0000  
Dilution : 1.0000  
Use Multiplier & Dilution Factor with ISTDs

Signal 1: DAD1 C, Sig=210,8 Ref=360,100

| Peak # | RetTime [min] | Type | Width [min] | Area [mAU*s] | Height [mAU] | Area %  |
|--------|---------------|------|-------------|--------------|--------------|---------|
| 1      | 11.518        | MM   | 0.4312      | 1.03631e4    | 400.52957    | 50.0538 |
| 2      | 15.683        | MM   | 0.5581      | 1.03408e4    | 308.79007    | 49.9462 |

Totals : 2.07039e4 709.31964

**Enantioenriched 8**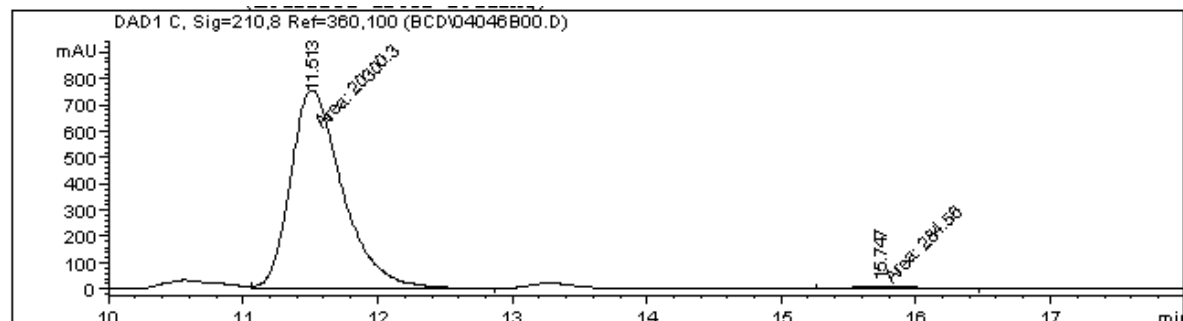=====  
Area Percent Report  
=====

Sorted By : Signal  
Multiplier : 1.0000  
Dilution : 1.0000  
Use Multiplier & Dilution Factor with ISTDs

Signal 1: DAD1 C, Sig=210,8 Ref=360,100

| Peak # | RetTime [min] | Type | Width [min] | Area [mAU*s] | Height [mAU] | Area %  |
|--------|---------------|------|-------------|--------------|--------------|---------|
| 1      | 11.513        | MM   | 0.4481      | 2.03003e4    | 755.02045    | 98.6176 |
| 2      | 15.747        | MM   | 0.5348      | 284.56036    | 8.86790      | 1.3824  |

Totals : 2.05849e4 763.88835

**Racemic 9**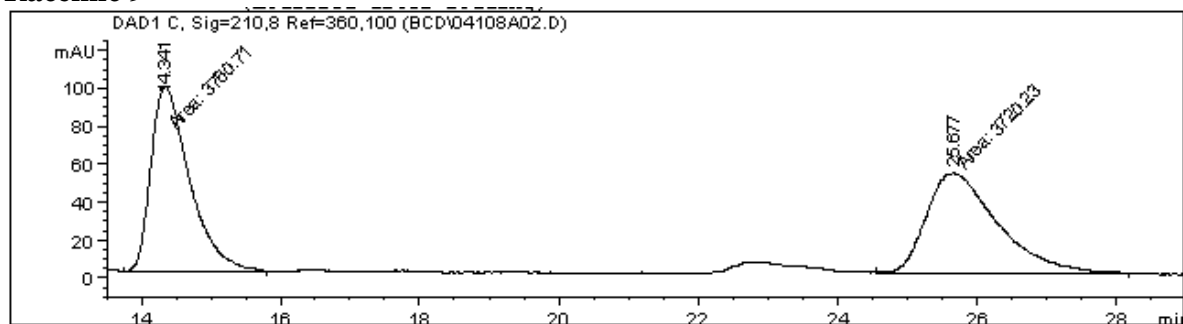

```

=====
                          Area Percent Report
=====
  
```

```

Sorted By      :      Signal
Multiplier     :      1.0000
Dilution      :      1.0000
Use Multiplier & Dilution Factor with ISTDs
  
```

Signal 1: DAD1 C, Sig=210,8 Ref=360,100

| Peak # | RetTime [min] | Type | Width [min] | Area [mAU*s] | Height [mAU] | Area %  |
|--------|---------------|------|-------------|--------------|--------------|---------|
| 1      | 14.341        | MM   | 0.6440      | 3760.70752   | 97.33033     | 50.2705 |
| 2      | 25.677        | MM   | 1.1746      | 3720.23462   | 52.78723     | 49.7295 |

```
Totals :                7480.94214  150.11756
```

**Enantioenriched 9**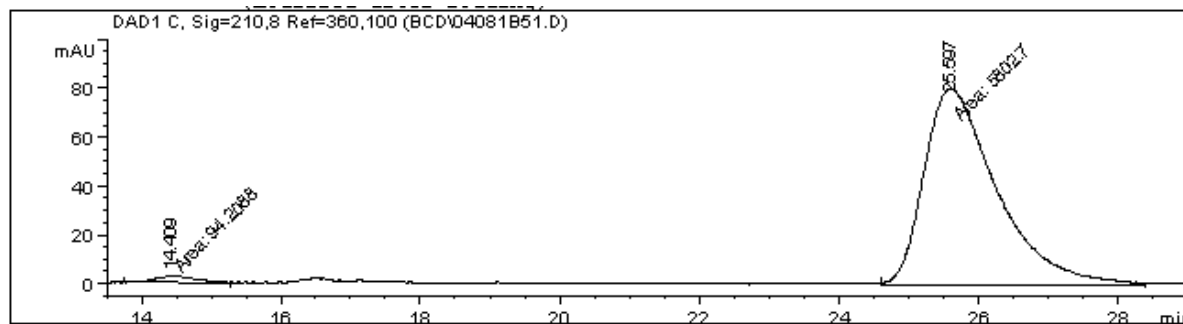

```

=====
                          Area Percent Report
=====
  
```

```

Sorted By      :      Signal
Multiplier     :      1.0000
Dilution      :      1.0000
Use Multiplier & Dilution Factor with ISTDs
  
```

Signal 1: DAD1 C, Sig=210,8 Ref=360,100

| Peak # | RetTime [min] | Type | Width [min] | Area [mAU*s] | Height [mAU] | Area %  |
|--------|---------------|------|-------------|--------------|--------------|---------|
| 1      | 14.409        | MM   | 0.6392      | 94.20879     | 2.45639      | 1.5976  |
| 2      | 25.597        | MM   | 1.2072      | 5802.69629   | 80.11526     | 98.4024 |

```
Totals :                5896.90508  82.57165
```

**Racemic 10**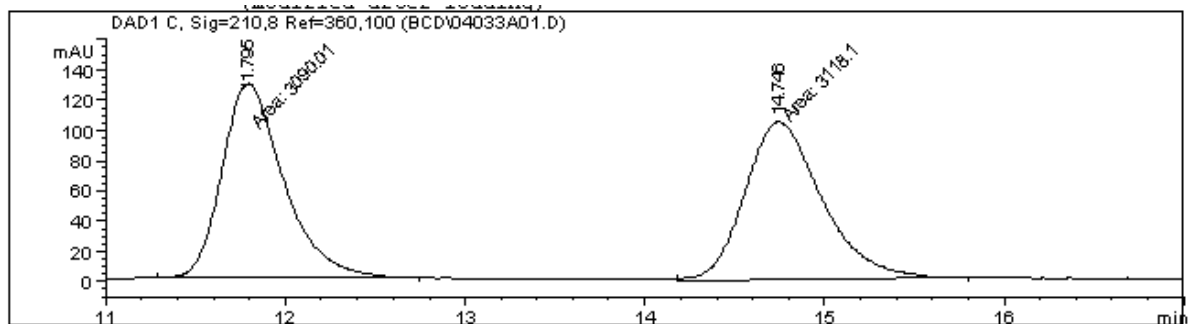

```

=====
                          Area Percent Report
=====
  
```

```

Sorted By      :      Signal
Multiplier     :      1.0000
Dilution      :      1.0000
Use Multiplier & Dilution Factor with ISTDs
  
```

Signal 1: DAD1 C, Sig=210,8 Ref=360,100

| Peak # | RetTime [min] | Tvov | Width [min] | Area [mAU*s] | Height [mAU] | Area %  |
|--------|---------------|------|-------------|--------------|--------------|---------|
| 1      | 11.795        | MM   | 0.4001      | 3090.01025   | 128.71451    | 49.7737 |
| 2      | 14.746        | MM   | 0.4982      | 3118.10400   | 104.30837    | 50.2263 |

```
Totals :                      6208.11426  233.02288
```

**Enantioenriched 10**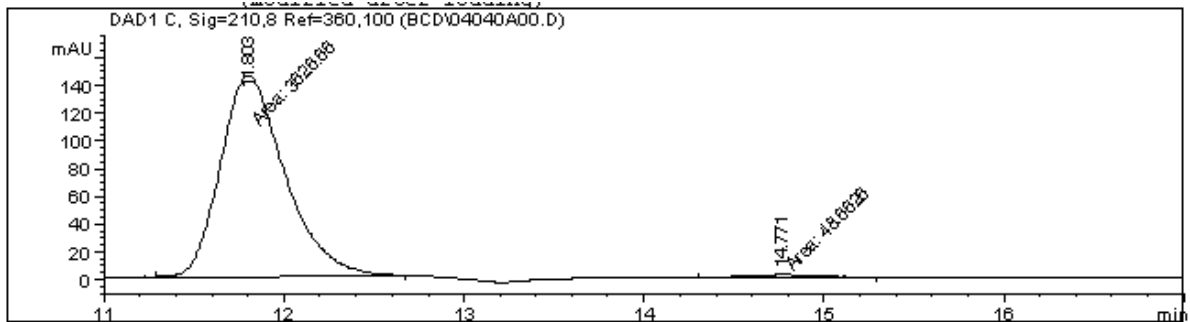

```

=====
                          Area Percent Report
=====
  
```

```

Sorted By      :      Signal
Multiplier     :      1.0000
Dilution      :      1.0000
Use Multiplier & Dilution Factor with ISTDs
  
```

Signal 1: DAD1 C, Sig=210,8 Ref=360,100

| Peak # | RetTime [min] | Tvov | Width [min] | Area [mAU*s] | Height [mAU] | Area %  |
|--------|---------------|------|-------------|--------------|--------------|---------|
| 1      | 11.803        | MM   | 0.4166      | 3626.66235   | 145.08121    | 98.6760 |
| 2      | 14.771        | MM   | 0.4320      | 48.66262     | 1.87721      | 1.3240  |

```
Totals :                      3675.32497  146.95842
```

**Racemic 11**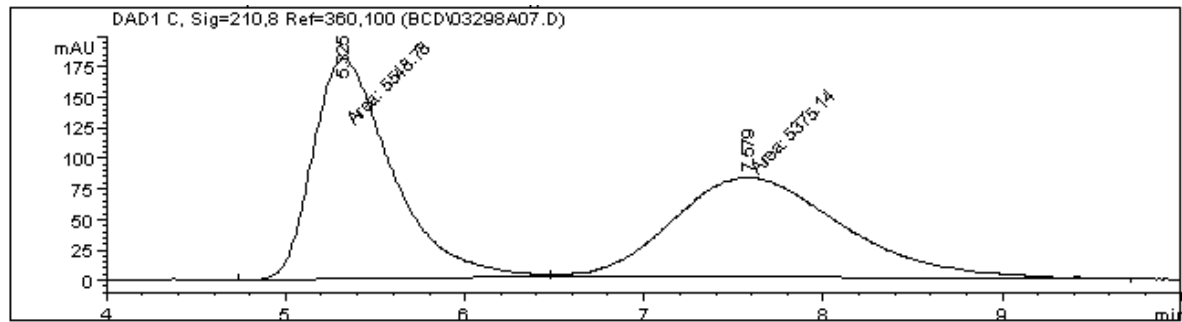

```

=====
                          Area Percent Report
=====
  
```

```

Sorted By      :      Signal
Multiplier     :      1.0000
Dilution      :      1.0000
Use Multiplier & Dilution Factor with ISTDs
  
```

Signal 1: DAD1 C, Sig=210,8 Ref=360,100

| Peak # | RetTime [min] | Type | Width [min] | Area [mAU*s] | Height [mAU] | Area %  |
|--------|---------------|------|-------------|--------------|--------------|---------|
| 1      | 5.325         | MM   | 0.5141      | 5548.77686   | 179.90102    | 50.7947 |
| 2      | 7.579         | MM   | 1.0957      | 5375.14258   | 81.76292     | 49.2053 |

```
Totals :                1.09239e4  261.66394
```

**Enantioenriched 11**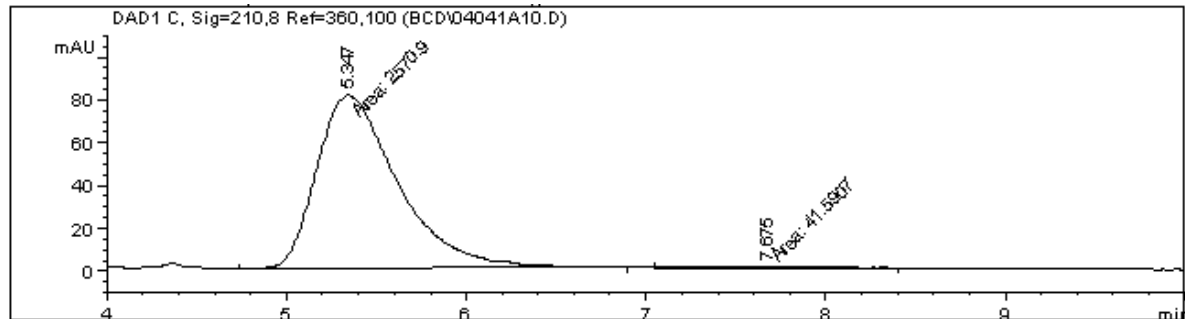

```

=====
                          Area Percent Report
=====
  
```

```

Sorted By      :      Signal
Multiplier     :      1.0000
Dilution      :      1.0000
Use Multiplier & Dilution Factor with ISTDs
  
```

Signal 1: DAD1 C, Sig=210,8 Ref=360,100

| Peak # | RetTime [min] | Type | Width [min] | Area [mAU*s] | Height [mAU] | Area %  |
|--------|---------------|------|-------------|--------------|--------------|---------|
| 1      | 5.347         | MM   | 0.5287      | 2570.90283   | 81.04272     | 98.4080 |
| 2      | 7.675         | MM   | 0.5765      | 41.59067     | 1.20242      | 1.5920  |

```
Totals :                2612.49350  82.24513
```

**Racemic 12**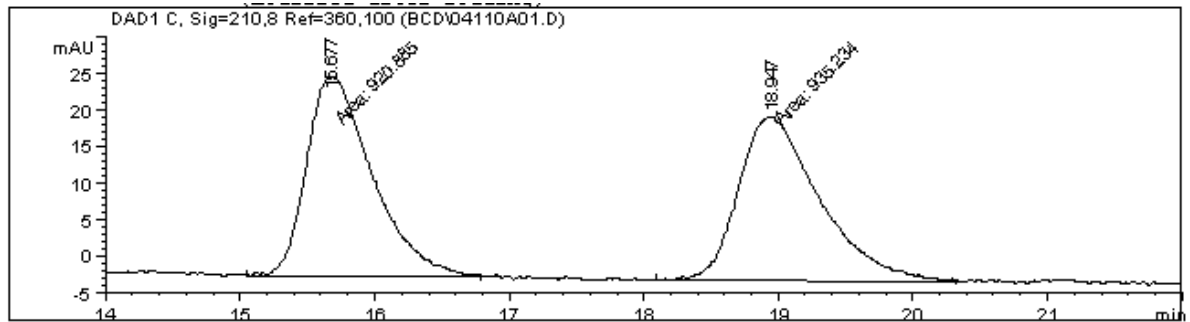

```

=====
                          Area Percent Report
=====
  
```

```

Sorted By      :      Signal
Multiplier     :      1.0000
Dilution      :      1.0000
Use Multiplier & Dilution Factor with ISTDs
  
```

Signal 1: DAD1 C, Sig=210,8 Ref=360,100

| Peak # | RetTime [min] | Type | Width [min] | Area [mAU*s] | Height [mAU] | Area %  |
|--------|---------------|------|-------------|--------------|--------------|---------|
| 1      | 15.677        | MM   | 0.5643      | 920.88477    | 27.20081     | 49.6135 |
| 2      | 18.947        | MM   | 0.6941      | 935.23383    | 22.45778     | 50.3865 |

```
Totals :                1856.11859  49.65860
```

**Enantioenriched 12**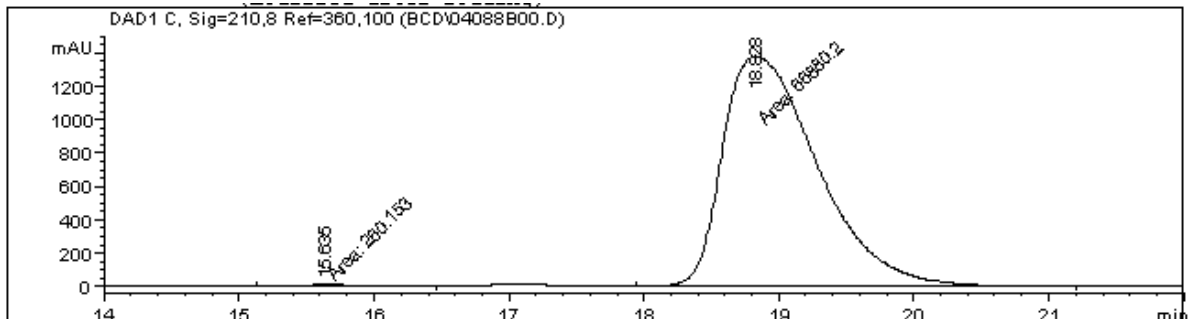

```

=====
                          Area Percent Report
=====
  
```

```

Sorted By      :      Signal
Multiplier     :      1.0000
Dilution      :      1.0000
Use Multiplier & Dilution Factor with ISTDs
  
```

Signal 1: DAD1 C, Sig=210,8 Ref=360,100

| Peak # | RetTime [min] | Type | Width [min] | Area [mAU*s] | Height [mAU] | Area %  |
|--------|---------------|------|-------------|--------------|--------------|---------|
| 1      | 15.635        | MM   | 0.5241      | 260.15283    | 8.27343      | 0.3875  |
| 2      | 18.828        | MM   | 0.8088      | 6.68802e4    | 1378.17578   | 99.6125 |

```
Totals :                6.71404e4  1386.44921
```



**Racemic 13**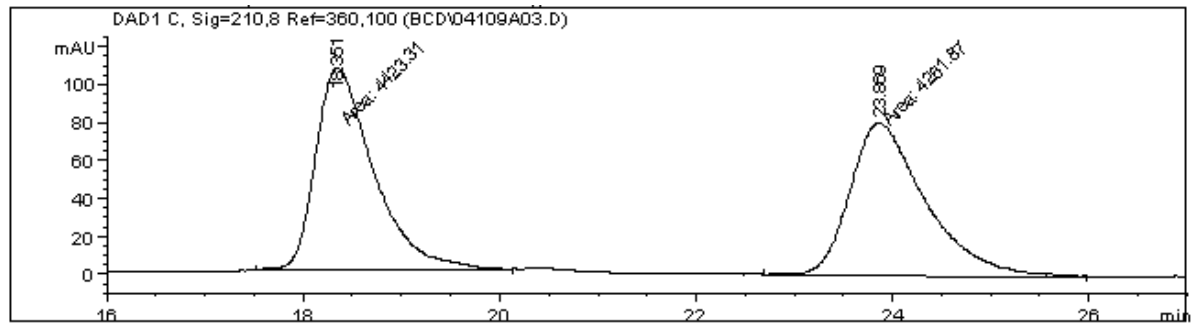

```

=====
                          Area Percent Report
=====
  
```

```

Sorted By      :      Signal
Multiplier     :      1.0000
Dilution      :      1.0000
Use Multiplier & Dilution Factor with ISTDs
  
```

Signal 1: DAD1 C, Sig=210,8 Ref=360,100

| Peak # | RetTime [min] | Type | Width [min] | Area [mAU*s] | Height [mAU] | Area %  |
|--------|---------------|------|-------------|--------------|--------------|---------|
| 1      | 18.351        | MM   | 0.6920      | 4423.31494   | 106.52859    | 50.9294 |
| 2      | 23.869        | MM   | 0.8878      | 4261.86865   | 80.00665     | 49.0706 |

```
Totals :                8685.18359  186.53524
```

**Enantioenriched 13**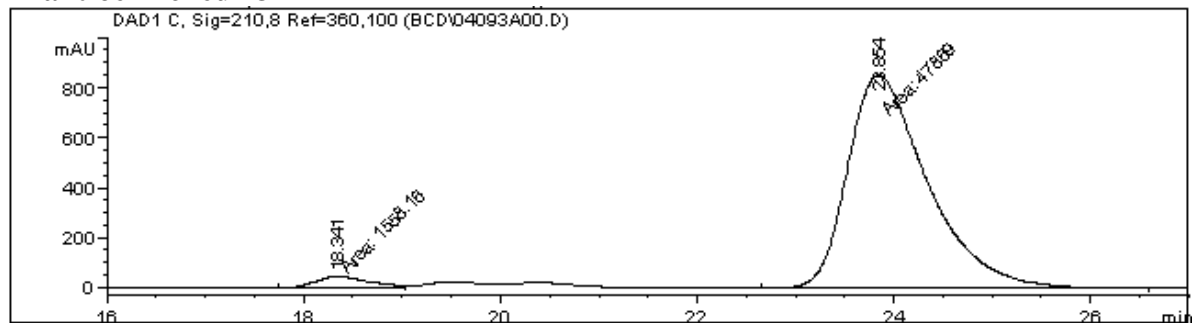

```

=====
                          Area Percent Report
=====
  
```

```

Sorted By      :      Signal
Multiplier     :      1.0000
Dilution      :      1.0000
Use Multiplier & Dilution Factor with ISTDs
  
```

Signal 1: DAD1 C, Sig=210,8 Ref=360,100

| Peak # | RetTime [min] | Type | Width [min] | Area [mAU*s] | Height [mAU] | Area %  |
|--------|---------------|------|-------------|--------------|--------------|---------|
| 1      | 18.341        | MM   | 0.6215      | 1558.15771   | 41.78444     | 3.1524  |
| 2      | 23.854        | MM   | 0.9369      | 4.78690e4    | 851.51935    | 96.8476 |

```
Totals :                4.94272e4  893.30378
```

**Racemic 14**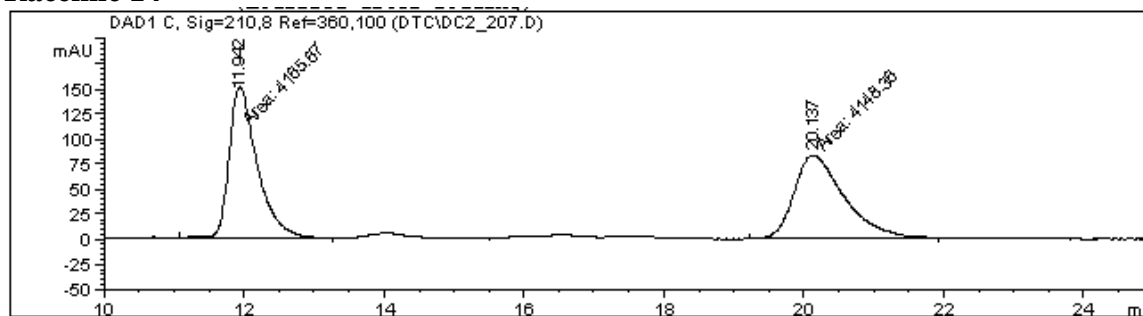

```

=====
                          Area Percent Report
=====
  
```

```

Sorted By      :      Signal
Multiplier     :      1.0000
Dilution      :      1.0000
Use Multiplier & Dilution Factor with ISTDs
  
```

Signal 1: DAD1 C, Sig=210,8 Ref=360,100

| Peak # | RetTime [min] | Type | Width [min] | Area [mAU*s] | Height [mAU] | Area %  |
|--------|---------------|------|-------------|--------------|--------------|---------|
| 1      | 11.942        | MM   | 0.4602      | 4165.66943   | 150.87856    | 50.1041 |
| 2      | 20.137        | MM   | 0.8329      | 4148.36035   | 83.00745     | 49.8959 |

```
Totals :                      8314.02979  233.88600
```

**Enantioenriched 14**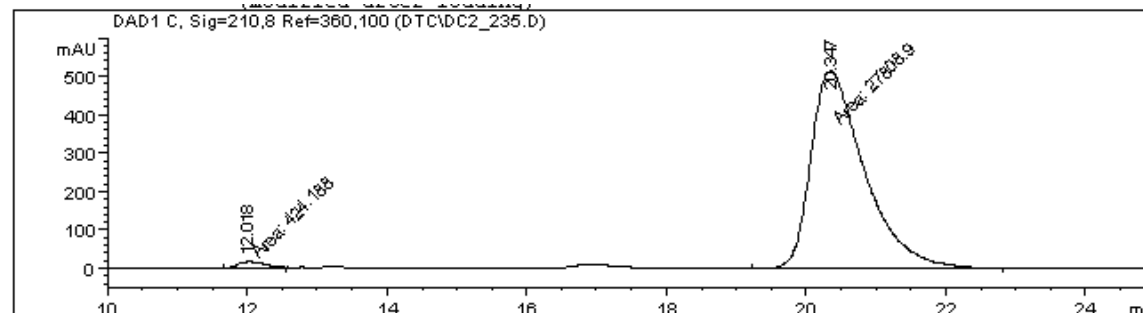

```

=====
                          Area Percent Report
=====
  
```

```

Sorted By      :      Signal
Multiplier     :      1.0000
Dilution      :      1.0000
Use Multiplier & Dilution Factor with ISTDs
  
```

Signal 1: DAD1 C, Sig=210,8 Ref=360,100

| Peak # | RetTime [min] | Type | Width [min] | Area [mAU*s] | Height [mAU] | Area %  |
|--------|---------------|------|-------------|--------------|--------------|---------|
| 1      | 12.018        | MM   | 0.4210      | 424.18753    | 16.79468     | 1.5024  |
| 2      | 20.347        | MM   | 0.8968      | 2.78089e4    | 516.81549    | 98.4976 |

```
Totals :                      2.82331e4  533.61017
```

**Racemic 15**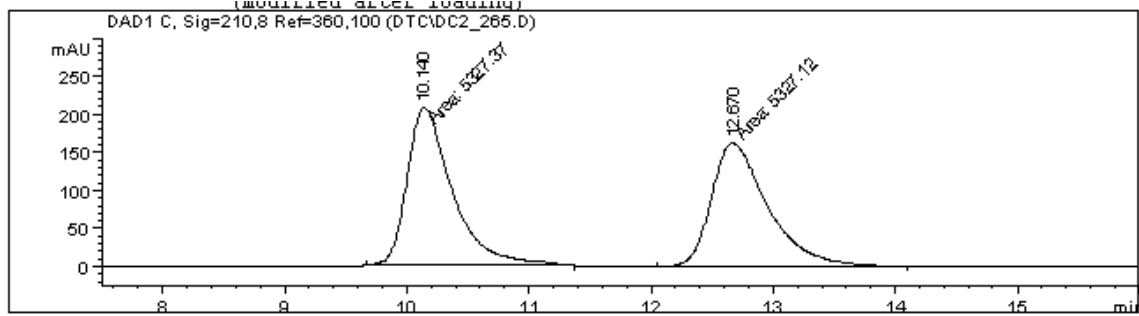

```

=====
                          Area Percent Report
=====
  
```

```

Sorted By      :      Signal
Multiplier     :      1.0000
Dilution       :      1.0000
Use Multiplier & Dilution Factor with ISTDs
  
```

Signal 1: DAD1 C, Sig=210,8 Ref=360,100

| Peak # | RetTime [min] | Type | Width [min] | Area [mAU*s] | Height [mAU] | Area %  |
|--------|---------------|------|-------------|--------------|--------------|---------|
| 1      | 10.140        | MM   | 0.4286      | 5327.37012   | 207.18054    | 50.0012 |
| 2      | 12.670        | MM   | 0.5420      | 5327.12061   | 163.80513    | 49.9988 |

```
Totals :                      1.06545e4  370.98567
```

**Enantioenriched 15**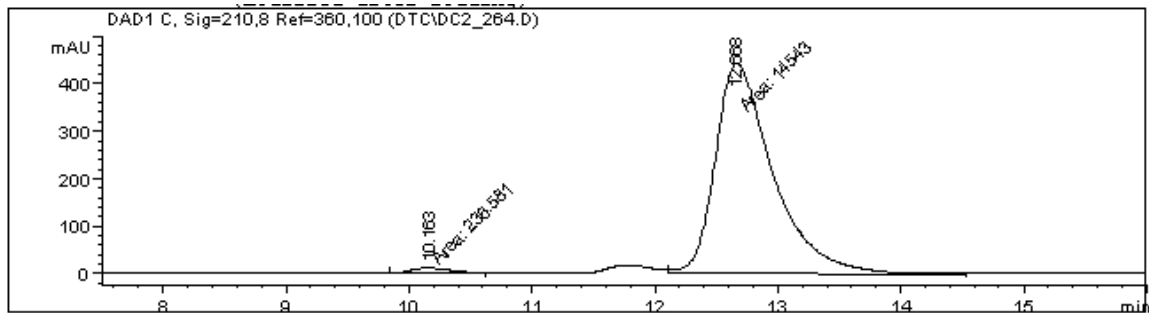

```

=====
                          Area Percent Report
=====
  
```

```

Sorted By      :      Signal
Multiplier     :      1.0000
Dilution       :      1.0000
Use Multiplier & Dilution Factor with ISTDs
  
```

Signal 1: DAD1 C, Sig=210,8 Ref=360,100

| Peak # | RetTime [min] | Type | Width [min] | Area [mAU*s] | Height [mAU] | Area %  |
|--------|---------------|------|-------------|--------------|--------------|---------|
| 1      | 10.163        | MM   | 0.4001      | 236.58078    | 9.85502      | 1.6007  |
| 2      | 12.668        | MM   | 0.5476      | 1.45430e4    | 442.65964    | 98.3993 |

```
Totals :                      1.47796e4  452.51466
```

**Racemic 16**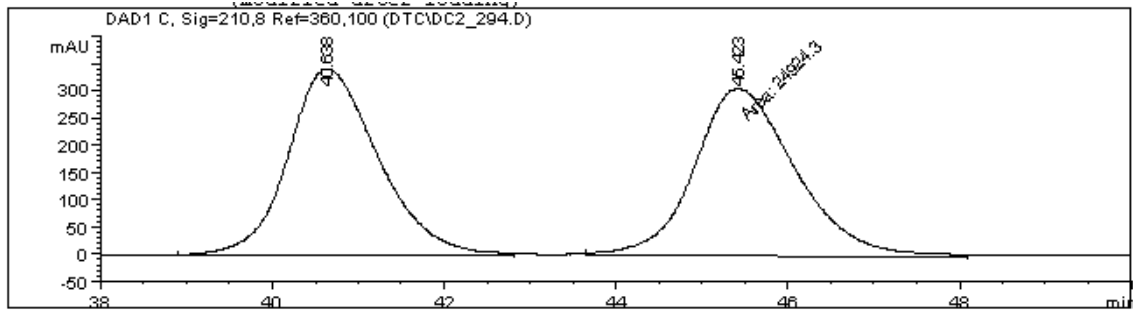

```

=====
                          Area Percent Report
=====
  
```

```

Sorted By      :      Signal
Multiplier    :      1.0000
Dilution      :      1.0000
Use Multiplier & Dilution Factor with ISTDs
  
```

Signal 1: DAD1 C, Sig=210,8 Ref=360,100

| Peak # | RetTime [min] | Type | Width [min] | Area [mAU*s] | Height [mAU] | Area %  |
|--------|---------------|------|-------------|--------------|--------------|---------|
| 1      | 40.638        | BB   | 0.8969      | 2.48786e4    | 341.12720    | 49.9541 |
| 2      | 45.423        | MM   | 1.3571      | 2.49243e4    | 306.09680    | 50.0459 |

```
Totals :                      4.98030e4  647.22400
```

**Enantioenriched 16**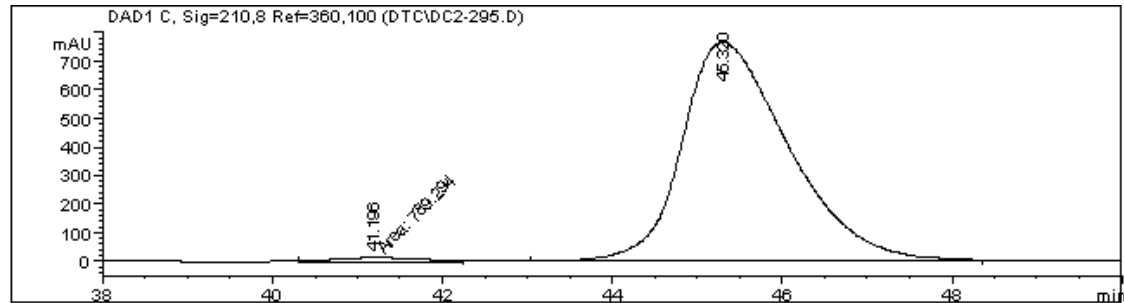

```

=====
                          Area Percent Report
=====
  
```

```

Sorted By      :      Signal
Multiplier    :      1.0000
Dilution      :      1.0000
Use Multiplier & Dilution Factor with ISTDs
  
```

Signal 1: DAD1 C, Sig=210,8 Ref=360,100

| Peak # | RetTime [min] | Type | Width [min] | Area [mAU*s] | Height [mAU] | Area %  |
|--------|---------------|------|-------------|--------------|--------------|---------|
| 1      | 41.196        | MM   | 1.1268      | 789.29370    | 11.67497     | 1.1737  |
| 2      | 45.320        | VB   | 1.0323      | 6.64607e4    | 764.43768    | 98.8263 |

```
Totals :                      6.72500e4  776.11266
```

**Racemic 17**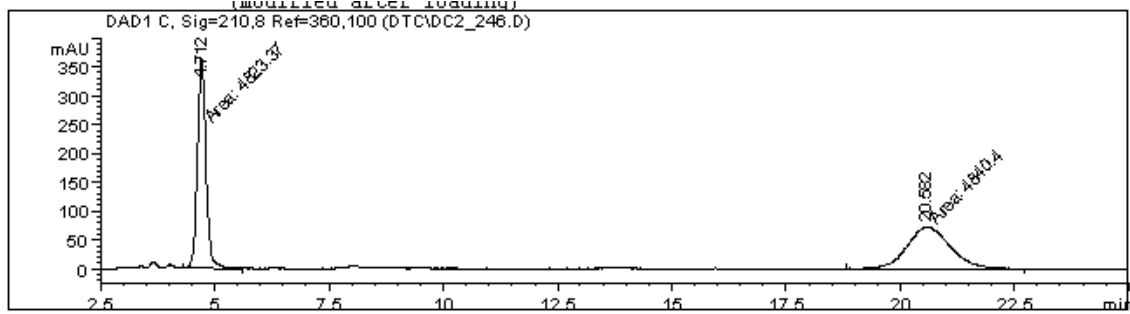

```

=====
                          Area Percent Report
=====
  
```

```

Sorted By      :      Signal
Multiplier     :      1.0000
Dilution       :      1.0000
Use Multiplier & Dilution Factor with ISTDs
  
```

Signal 1: DAD1 C, Sig=210,8 Ref=360,100

| Peak # | RetTime [min] | Type | Width [min] | Area [mAU*s] | Height [mAU] | Area %  |
|--------|---------------|------|-------------|--------------|--------------|---------|
| 1      | 4.712         | MM   | 0.2206      | 4823.36768   | 364.35986    | 49.9119 |
| 2      | 20.582        | MM   | 1.1157      | 4840.39795   | 72.30647     | 50.0881 |

```
Totals :                9663.76563  436.66634
```

**Enantioenriched 17**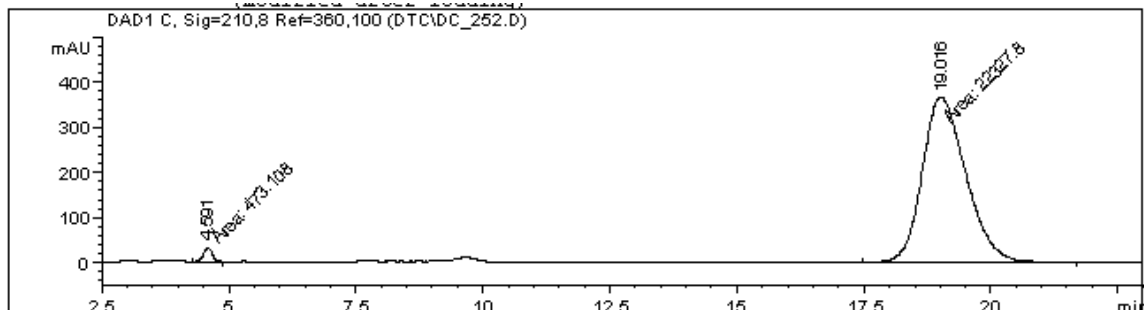

```

=====
                          Area Percent Report
=====
  
```

```

Sorted By      :      Signal
Multiplier     :      1.0000
Dilution       :      1.0000
Use Multiplier & Dilution Factor with ISTDs
  
```

Signal 1: DAD1 C, Sig=210,8 Ref=360,100

| Peak # | RetTime [min] | Type | Width [min] | Area [mAU*s] | Height [mAU] | Area %  |
|--------|---------------|------|-------------|--------------|--------------|---------|
| 1      | 4.591         | MM   | 0.2267      | 473.10818    | 34.77486     | 2.0750  |
| 2      | 19.016        | MM   | 1.0096      | 2.23278e4    | 368.59753    | 97.9250 |

```
Totals :                2.28009e4  403.37240
```

**Racemic 18**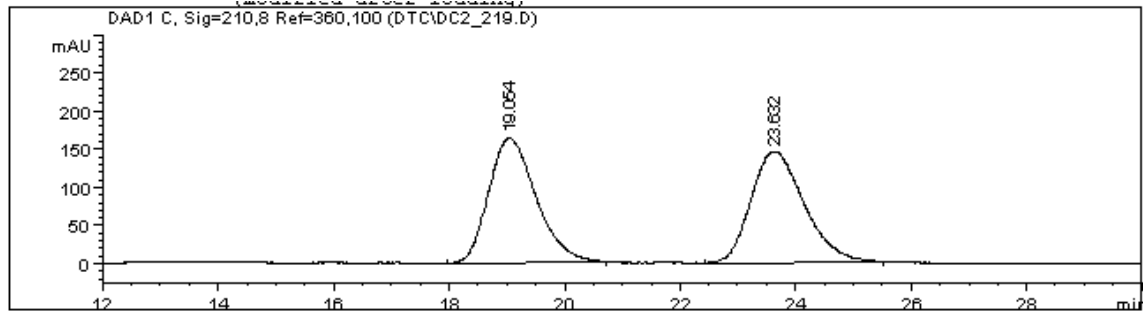

```

=====
                          Area Percent Report
=====
  
```

```

Sorted By      :      Signal
Multiplier     :      1.0000
Dilution      :      1.0000
Use Multiplier & Dilution Factor with ISTDs
  
```

Signal 1: DAD1 C, Sig=210,8 Ref=360,100

| Peak # | RetTime [min] | Type | Width [min] | Area [mAU*s] | Height [mAU] | Area %  |
|--------|---------------|------|-------------|--------------|--------------|---------|
| 1      | 19.054        | VB   | 0.7431      | 9324.69629   | 163.56812    | 50.0357 |
| 2      | 23.632        | VB   | 0.7600      | 9311.39551   | 145.61209    | 49.9643 |

```
Totals :                1.86361e4  309.18021
```

**Enantioenriched 18**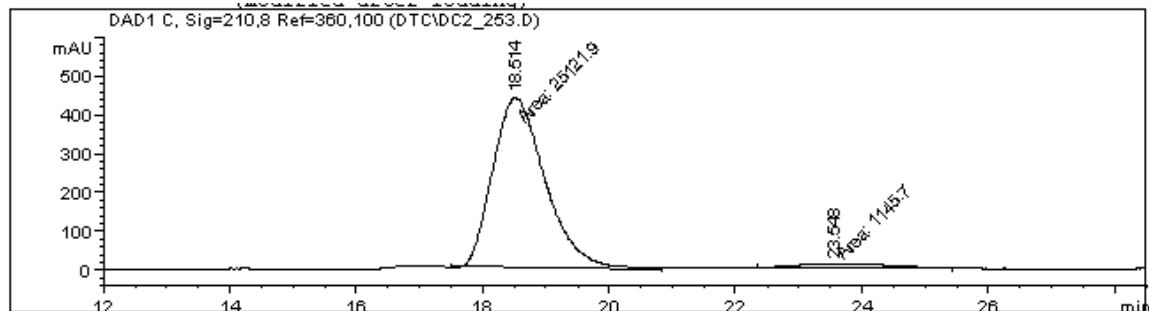

```

=====
                          Area Percent Report
=====
  
```

```

Sorted By      :      Signal
Multiplier     :      1.0000
Dilution      :      1.0000
Use Multiplier & Dilution Factor with ISTDs
  
```

Signal 1: DAD1 C, Sig=210,8 Ref=360,100

| Peak # | RetTime [min] | Type | Width [min] | Area [mAU*s] | Height [mAU] | Area %  |
|--------|---------------|------|-------------|--------------|--------------|---------|
| 1      | 18.514        | MM   | 0.9574      | 2.51219e4    | 437.34329    | 95.6384 |
| 2      | 23.548        | MM   | 1.6736      | 1145.69629   | 11.40958     | 4.3616  |

**Racemic 19**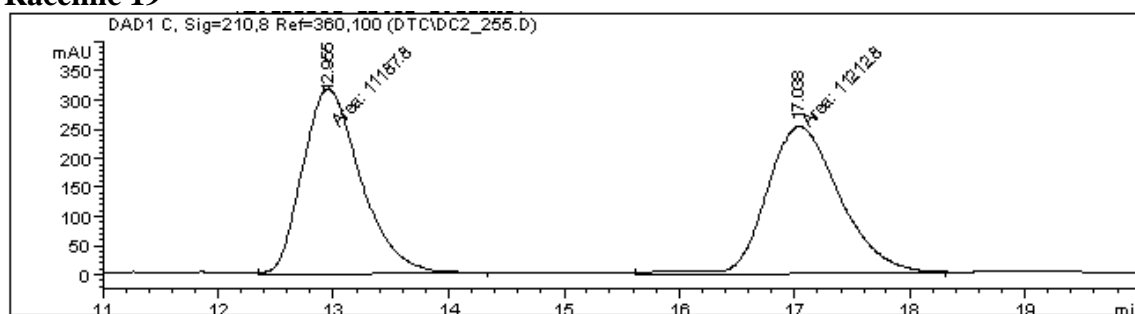

```

=====
                          Area Percent Report
=====
  
```

```

Sorted By      :      Signal
Multiplier     :      1.0000
Dilution      :      1.0000
Use Multiplier & Dilution Factor with ISTDs
  
```

Signal 1: DAD1 C, Sig=210,8 Ref=360,100

| Peak # | RetTime [min] | Type | Width [min] | Area [mAU*s] | Height [mAU] | Area %  |
|--------|---------------|------|-------------|--------------|--------------|---------|
| 1      | 12.955        | MM   | 0.5848      | 1.11878e4    | 318.82336    | 49.9442 |
| 2      | 17.038        | MM   | 0.7372      | 1.12128e4    | 253.50572    | 50.0558 |

```
Totals :                2.24006e4  572.32909
```

**Enantioenriched 19**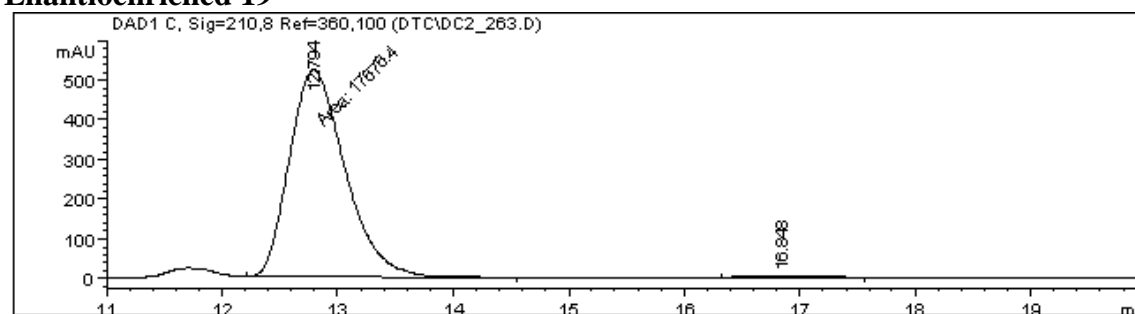

```

=====
                          Area Percent Report
=====
  
```

```

Sorted By      :      Signal
Multiplier     :      1.0000
Dilution      :      1.0000
Use Multiplier & Dilution Factor with ISTDs
  
```

Signal 1: DAD1 C, Sig=210,8 Ref=360,100

| Peak # | RetTime [min] | Type | Width [min] | Area [mAU*s] | Height [mAU] | Area %  |
|--------|---------------|------|-------------|--------------|--------------|---------|
| 1      | 12.794        | MM   | 0.5631      | 1.76764e4    | 523.14374    | 98.5410 |
| 2      | 16.848        | VV   | 0.4749      | 261.71262    | 6.53989      | 1.4590  |

```
Totals :                1.79382e4  529.68363
```

**Racemic 20**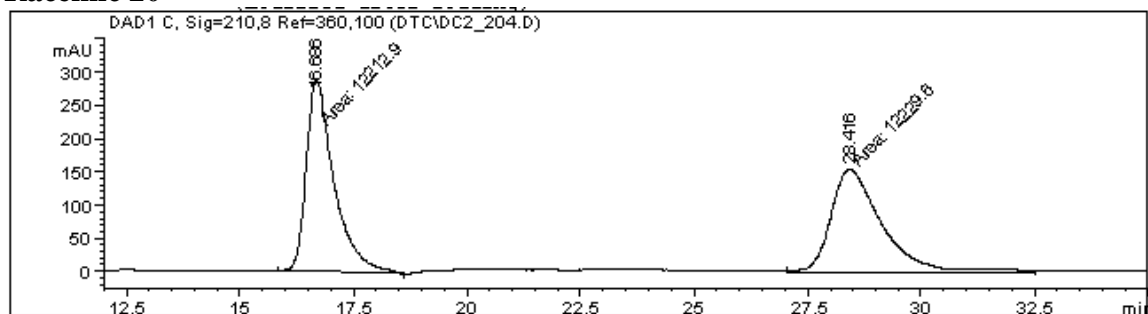

```

=====
                          Area Percent Report
=====
  
```

```

Sorted By      :      Signal
Multiplier     :      1.0000
Dilution      :      1.0000
Use Multiplier & Dilution Factor with ISTDs
  
```

Signal 1: DAD1 C, Sig=210,8 Ref=360,100

| Peak # | RetTime [min] | Type | Width [min] | Area [mAU*s] | Height [mAU] | Area %  |
|--------|---------------|------|-------------|--------------|--------------|---------|
| 1      | 16.686        | MM   | 0.7058      | 1.22129e4    | 288.40906    | 49.9659 |
| 2      | 28.416        | MM   | 1.3164      | 1.22296e4    | 154.84006    | 50.0341 |

```
Totals :                2.44424e4  443.24911
```

**Enantioenriched 20**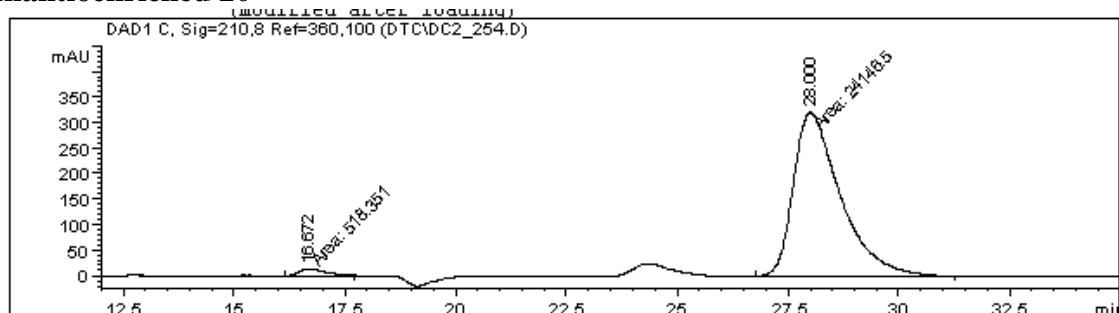

```

=====
                          Area Percent Report
=====
  
```

```

Sorted By      :      Signal
Multiplier     :      1.0000
Dilution      :      1.0000
Use Multiplier & Dilution Factor with ISTDs
  
```

Signal 1: DAD1 C, Sig=210,8 Ref=360,100

| Peak # | RetTime [min] | Type | Width [min] | Area [mAU*s] | Height [mAU] | Area %  |
|--------|---------------|------|-------------|--------------|--------------|---------|
| 1      | 16.672        | MM   | 0.6819      | 518.35059    | 12.66867     | 2.1016  |
| 2      | 28.000        | MM   | 1.2475      | 2.41465e4    | 322.60889    | 97.8984 |

```
Totals :                2.46649e4  335.27755
```



**Racemic 21**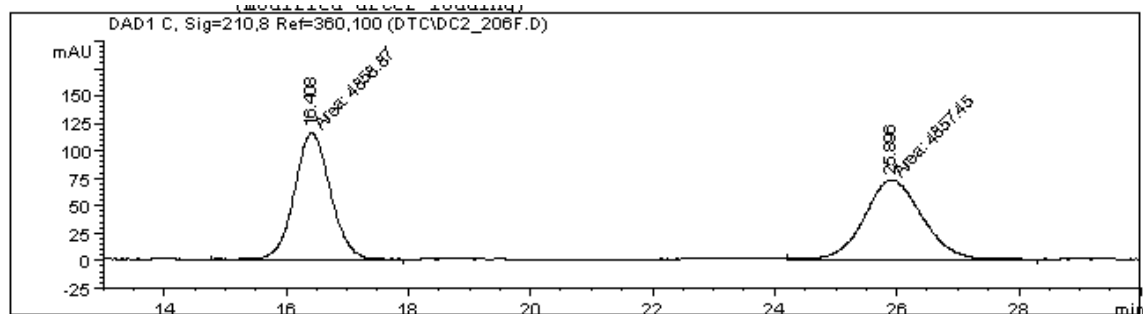

```

=====
                          Area Percent Report
=====
  
```

```

Sorted By      :      Signal
Multiplier     :      1.0000
Dilution      :      1.0000
Use Multiplier & Dilution Factor with ISTDs
  
```

Signal 1: DAD1 C, Sig=210,8 Ref=360,100

| Peak # | RetTime [min] | Type | Width [min] | Area [mAU*s] | Height [mAU] | Area %  |
|--------|---------------|------|-------------|--------------|--------------|---------|
| 1      | 16.408        | MM   | 0.6987      | 4858.87061   | 115.90540    | 50.0073 |
| 2      | 25.896        | MM   | 1.1123      | 4857.45020   | 72.78550     | 49.9927 |

```
Totals :                9716.32080  188.69090
```

**Enantioenriched 21**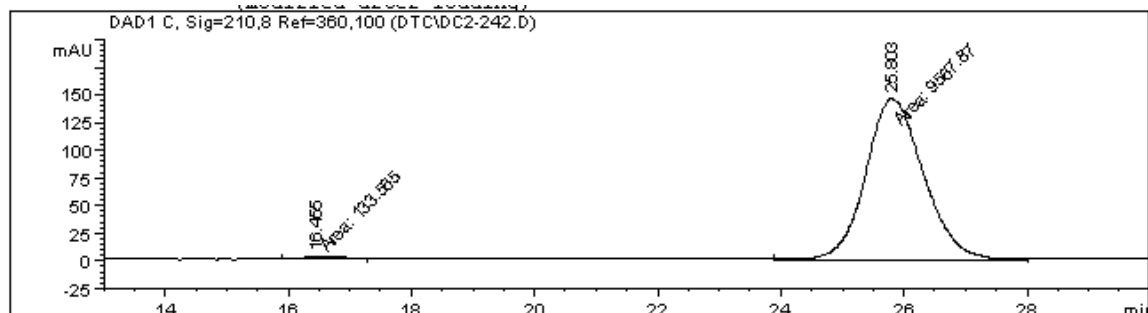

```

=====
                          Area Percent Report
=====
  
```

```

Sorted By      :      Signal
Multiplier     :      1.0000
Dilution      :      1.0000
Use Multiplier & Dilution Factor with ISTDs
  
```

Signal 1: DAD1 C, Sig=210,8 Ref=360,100

| Peak # | RetTime [min] | Type | Width [min] | Area [mAU*s] | Height [mAU] | Area %  |
|--------|---------------|------|-------------|--------------|--------------|---------|
| 1      | 16.455        | MM   | 0.7143      | 133.56480    | 3.11629      | 1.3768  |
| 2      | 25.803        | MM   | 1.0957      | 9567.86523   | 145.54152    | 98.6232 |

```
Totals :                9701.43004  148.65781
```

**Racemic 22**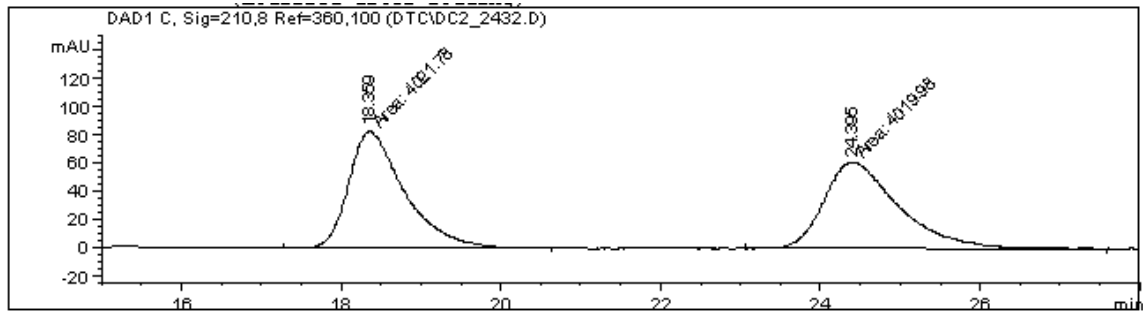

```

=====
                          Area Percent Report
=====
  
```

```

Sorted By      :      Signal
Multiplier     :      1.0000
Dilution      :      1.0000
Use Multiplier & Dilution Factor with ISTDs
  
```

Signal 1: DAD1 C, Sig=210,8 Ref=360,100

| Peak # | RetTime [min] | Type | Width [min] | Area [mAU*s] | Height [mAU] | Area %  |
|--------|---------------|------|-------------|--------------|--------------|---------|
| 1      | 18.359        | MM   | 0.8126      | 4021.78052   | 82.48543     | 50.0112 |
| 2      | 24.395        | MM   | 1.0936      | 4019.97705   | 61.26331     | 49.9888 |

Totals :                    8041.75757   143.74874

**Enantioenriched 22**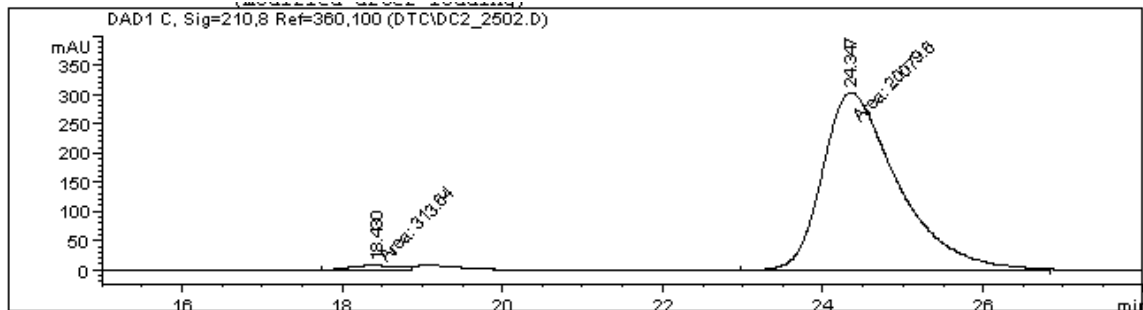

```

=====
                          Area Percent Report
=====
  
```

```

Sorted By      :      Signal
Multiplier     :      1.0000
Dilution      :      1.0000
Use Multiplier & Dilution Factor with ISTDs
  
```

Signal 1: DAD1 C, Sig=210,8 Ref=360,100

| Peak # | RetTime [min] | Type | Width [min] | Area [mAU*s] | Height [mAU] | Area %  |
|--------|---------------|------|-------------|--------------|--------------|---------|
| 1      | 18.430        | MM   | 0.7665      | 313.64005    | 6.81946      | 1.5380  |
| 2      | 24.347        | MM   | 1.0983      | 2.00796e4    | 304.70801    | 98.4620 |

Totals :                    2.03932e4   311.52747

**Racemic 23**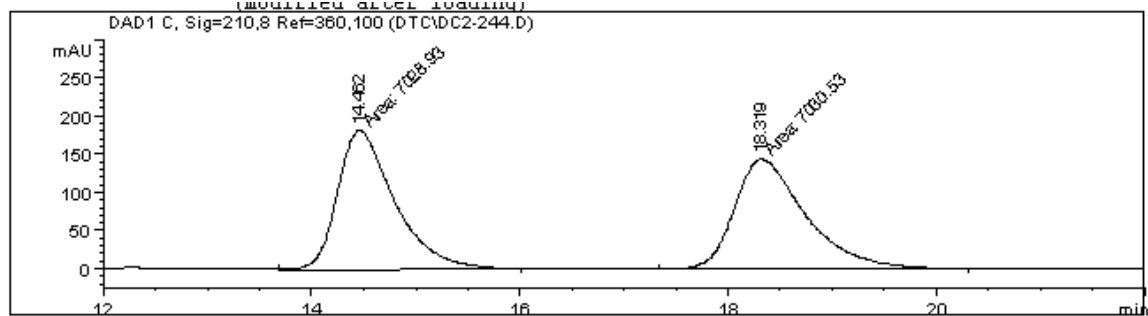

```

=====
                          Area Percent Report
=====
  
```

```

Sorted By      :      Signal
Multiplier     :      1.0000
Dilution      :      1.0000
Use Multiplier & Dilution Factor with ISTDs
  
```

Signal 1: DAD1 C, Sig=210,8 Ref=360,100

| Peak # | RetTime [min] | Type | Width [min] | Area [mAU*s] | Height [mAU] | Area %  |
|--------|---------------|------|-------------|--------------|--------------|---------|
| 1      | 14.462        | MM   | 0.6419      | 7028.93018   | 182.49583    | 49.9943 |
| 2      | 18.319        | MM   | 0.8103      | 7030.52881   | 144.60455    | 50.0057 |

Totals :                            1.40595e4    327.10039

**Enantioenriched 23**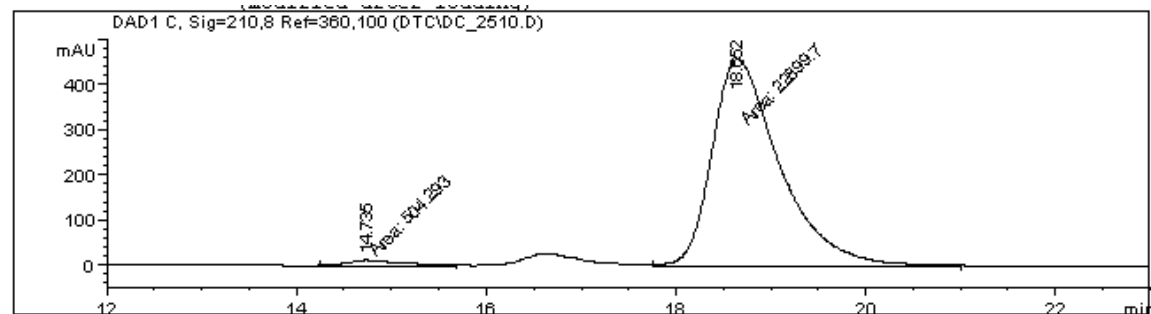

```

=====
                          Area Percent Report
=====
  
```

```

Sorted By      :      Signal
Multiplier     :      1.0000
Dilution      :      1.0000
Use Multiplier & Dilution Factor with ISTDs
  
```

Signal 1: DAD1 C, Sig=210,8 Ref=360,100

| Peak # | RetTime [min] | Type | Width [min] | Area [mAU*s] | Height [mAU] | Area %  |
|--------|---------------|------|-------------|--------------|--------------|---------|
| 1      | 14.735        | MM   | 0.6665      | 504.29297    | 12.60953     | 2.1547  |
| 2      | 18.652        | MM   | 0.8314      | 2.28997e4    | 459.04889    | 97.8453 |

Totals :                            2.34040e4    471.65842

**Racemic 24**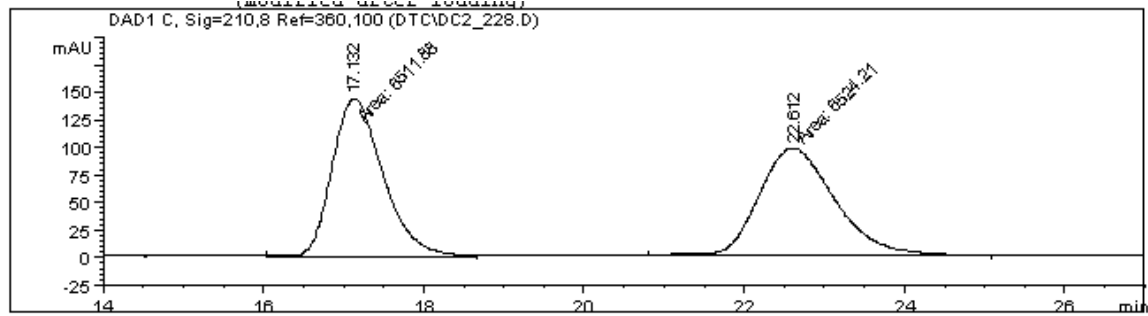

```

=====
                          Area Percent Report
=====
  
```

```

Sorted By      :      Simal
Multiplier     :      1.0000
Dilution      :      1.0000
Use Multiplier & Dilution Factor with ISTDs
  
```

Signal 1: DAD1 C, Sig=210,8 Ref=360,100

| Peak # | RetTime [min] | Type | Width [min] | Area [mAU*s] | Height [mAU] | Area %  |
|--------|---------------|------|-------------|--------------|--------------|---------|
| 1      | 17.132        | MM   | 0.7522      | 6511.87793   | 144.28413    | 49.9527 |
| 2      | 22.612        | MM   | 1.1124      | 6524.20947   | 97.74577     | 50.0473 |

```
Totals :                1.30361e4  242.02991
```

**Enantioenriched 24**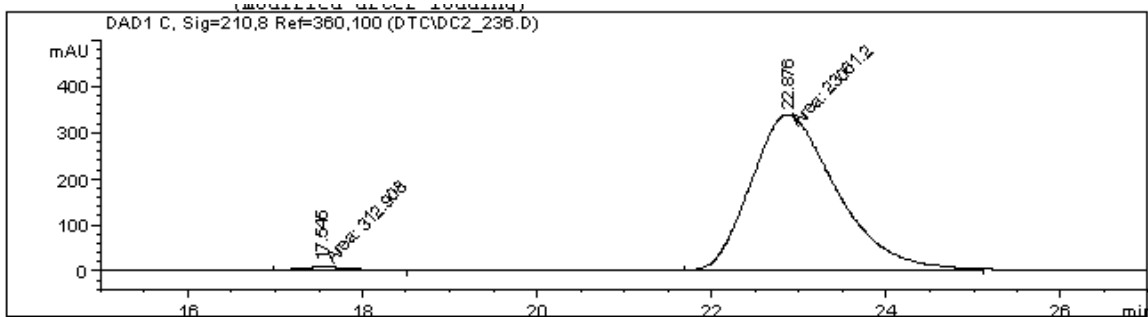

```

=====
                          Area Percent Report
=====
  
```

```

Sorted By      :      Simal
Multiplier     :      1.0000
Dilution      :      1.0000
Use Multiplier & Dilution Factor with ISTDs
  
```

Signal 1: DAD1 C, Sig=210,8 Ref=360,100

| Peak # | RetTime [min] | Type | Width [min] | Area [mAU*s] | Height [mAU] | Area %  |
|--------|---------------|------|-------------|--------------|--------------|---------|
| 1      | 17.545        | MM   | 0.7349      | 312.90839    | 7.09670      | 1.3387  |
| 2      | 22.876        | MM   | 1.1402      | 2.30612e4    | 337.08762    | 98.6613 |

```
Totals :                2.33741e4  344.18432
```

### Determination of Absolute Stereochemistry of **4**

The absolute stereochemistry of **4** was determined by the X-ray diffraction. Pure material was obtained by recrystallization from hexanes.

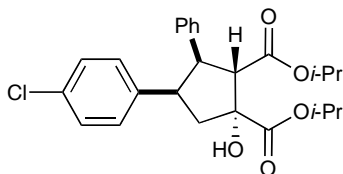

X-ray crystal structure of (1*R*,2*S*,3*R*,4*R*)-diisopropyl 4-(4-chlorophenyl)-1-hydroxy-3-phenylcyclopentane-1,2-dicarboxylate:

X-ray diffraction was performed at  $-120\text{ }^{\circ}\text{C}$  and raw frame data were processed using SAINT. Molecular structure was solved using direct methods and refined by F2 by full-matrix least-squares techniques. The GOF = 0.80 for 285 variables refined to  $R1 = 0.04$  for 3272 reflections with  $I > 2\sigma(I)$ . There was no absorption correction. The flack parameter was  $-0.11$ . Further information is contained in the CCDC file 793381.

### Determination of Relative Stereochemistry of the Minor Diastereomer (**29**)

The relative stereochemistry of **29** (the minor diastereomer from the reaction) was determined by the X-ray diffraction. Pure material was obtained by recrystallization from hexanes.

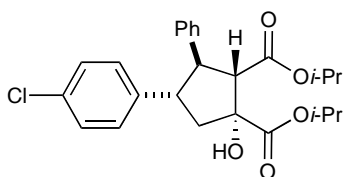

X-ray crystal structure of Diisopropyl 4-(4-chlorophenyl)-1-hydroxy-3-phenylcyclopentane-1,2-dicarboxylate:

X-ray diffraction was performed at  $-120\text{ }^{\circ}\text{C}$  and raw frame data were processed using SAINT. Molecular structure was solved using direct methods and refined by F2 by full-matrix least-squares techniques. The GOF = 1.03 for 285 variables refined to  $R1 = 0.04$  for 2679 reflections with  $I > 2\sigma(I)$ . There was no absorption correction. The flack parameter was 0.0. Further information is contained in the CCDC file 793382.
